# Supplementary material for: Body mass index, proteinuria and total lymphocyte counts in predicting treatment responses among ART naïve individuals with HIV initiated on antiretroviral treatment in Dar es Salaam, Tanzania, 2019: a cohort study
Source: PubMed Central journal article supplement — BMJ Open. 2022 Jun 8;12(6):e059193. doi: 10.1136/bmjopen-2021-059193 (PMC9185589; doi:10.1136/bmjopen-2021-059193), 2022-06-08
Supplement: bmjopen-2021-059193.draft_revisions.pdf [file bmjopen-2021-059193.draft_revisions.pdf]

# BMJ Open

BMJ Open is committed to open peer review. As part of this commitment we make the peer review history of every article we publish publicly available.

When an article is published we post the peer reviewers' comments and the authors' responses online. We also post the versions of the paper that were used during peer review. These are the versions that the peer review comments apply to.

The versions of the paper that follow are the versions that were submitted during the peer review process. They are not the versions of record or the final published versions. They should not be cited or distributed as the published version of this manuscript.

BMJ Open is an open access journal and the full, final, typeset and author-corrected version of record of the manuscript is available on our site with no access controls, subscription charges or pay-per-view fees (<http://bmjopen.bmj.com>).

If you have any questions on BMJ Open's open peer review process please email [info.bmjopen@bmj.com](mailto:info.bmjopen@bmj.com)

# BMJ Open

**Body mass index, proteinuria and total lymphocyte counts  
in predicting treatment responses among HIV-infected  
individuals initiated on antiretroviral treatment in Dar es  
Salaam, Tanzania, 2019: a cohort study**

|                               |                                                                                                                                                                                                                                                                                                                                                                                         |
|-------------------------------|-----------------------------------------------------------------------------------------------------------------------------------------------------------------------------------------------------------------------------------------------------------------------------------------------------------------------------------------------------------------------------------------|
| Journal:                      | <i>BMJ Open</i>                                                                                                                                                                                                                                                                                                                                                                         |
| Manuscript ID                 | bmjopen-2021-059193                                                                                                                                                                                                                                                                                                                                                                     |
| Article Type:                 | Original research                                                                                                                                                                                                                                                                                                                                                                       |
| Date Submitted by the Author: | 11-Nov-2021                                                                                                                                                                                                                                                                                                                                                                             |
| Complete List of Authors:     | Munseri, Patricia; Muhimbili University of Health and Allied Sciences School of Medicine,<br>Jassely, Lazaro; Muhimbili University of Health and Allied Sciences School of Medicine, Internal Medicine<br>Tumaini, Basil; Muhimbili University of Health and Allied Sciences, Internal Medicine<br>Hertzmark, Ellen; Harvard University T H Chan School of Public Health, Global Health |
| Keywords:                     | INTERNAL MEDICINE, INFECTIOUS DISEASES, HIV & AIDS < INFECTIOUS DISEASES                                                                                                                                                                                                                                                                                                                |
|                               |                                                                                                                                                                                                                                                                                                                                                                                         |

SCHOLARONE™  
Manuscripts

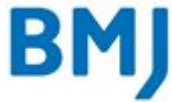

I, the Submitting Author has the right to grant and does grant on behalf of all authors of the Work (as defined in the below author licence), an exclusive licence and/or a non-exclusive licence for contributions from authors who are: i) UK Crown employees; ii) where BMJ has agreed a CC-BY licence shall apply, and/or iii) in accordance with the terms applicable for US Federal Government officers or employees acting as part of their official duties; on a worldwide, perpetual, irrevocable, royalty-free basis to BMJ Publishing Group Ltd ("BMJ") its licensees and where the relevant Journal is co-owned by BMJ to the co-owners of the Journal, to publish the Work in this journal and any other BMJ products and to exploit all rights, as set out in our [licence](#).

The Submitting Author accepts and understands that any supply made under these terms is made by BMJ to the Submitting Author unless you are acting as an employee on behalf of your employer or a postgraduate student of an affiliated institution which is paying any applicable article publishing charge ("APC") for Open Access articles. Where the Submitting Author wishes to make the Work available on an Open Access basis (and intends to pay the relevant APC), the terms of reuse of such Open Access shall be governed by a Creative Commons licence – details of these licences and which [Creative Commons](#) licence will apply to this Work are set out in our licence referred to above.

Other than as permitted in any relevant BMJ Author's Self Archiving Policies, I confirm this Work has not been accepted for publication elsewhere, is not being considered for publication elsewhere and does not duplicate material already published. I confirm all authors consent to publication of this Work and authorise the granting of this licence.

1  
2  
3 **1 Body mass index, proteinuria and total lymphocyte counts in predicting treatment**  
4  
5 **2 responses among HIV-infected individuals initiated on antiretroviral treatment in Dar es**  
6  
7 **3 Salaam, Tanzania, 2019: a cohort study**  
8  
9  
10  
11  
12  
13

14 5 Patricia Munseri<sup>1\*</sup>§, Lazaro Jassely<sup>1\*</sup>, Basil Tumaini<sup>1</sup>, Ellen Hertzmark<sup>2</sup>  
15  
16  
17 6

18  
19  
20 7 <sup>1</sup> Department of Internal Medicine, Muhimbili University of Health and Allied Sciences, Dar es  
21  
22 8 Salaam, Tanzania

23  
24  
25 9 <sup>2</sup> Department of Global Health and Population, Harvard University T H Chan School of Public  
26  
27 10 Health, Boston, MA  
28  
29

30  
31  
32  
33 12 § Corresponding author  
34  
35

36 13 Email: [patricia.munseri@gmail.com](mailto:patricia.munseri@gmail.com) (PM)  
37  
38  
39 14

40  
41  
42 15 \*Shared first Author  
43  
44  
45 16

46  
47  
48 17 Word count abstract: 291  
49  
50

51 18 Word count manuscript: 3204  
52  
53  
54  
55  
56  
57

1  
2  
3  
4  
5  
6  
7  
8  
9  
10  
11  
12  
13  
14  
15  
16  
17  
18  
19  
20  
21  
22  
23  
24  
25  
26  
27  
28  
29  
30  
31  
32  
33  
34  
35  
36  
37  
38  
39  
40  
41  
42  
43  
44  
45  
46  
47  
48  
49  
50  
51  
52  
53  
54  
55  
56  
57  
58  
59  
60

19 **Keywords:** monitoring ART treatment; HIV/AIDS; CD4 count; BMI in HIV; proteinuria in  
20 HIV; viral suppression

For peer review only

1  
2  
3 22 **Abstract**  
4  
5

6 23 **Objectives:** To explore the potential use of body mass index, proteinuria, and total lymphocyte  
7  
8 24 count changes in predicting immunological and virological response in HIV-infected individuals  
9  
10 25 initiated on antiretroviral therapy (ART).  
11  
12

13  
14 26 **Design:** Prospective cohort study.  
15

16  
17 27 **Setting:** Three urban HIV care and treatment centres (CTC) in Dar es Salaam.  
18

19  
20 28 **Participants:** HIV-infected individuals initiating ART.  
21

22  
23 29 **Outcome measures:** HIV viral load <1000 copies/ml (virally suppressed) at six months after  
24  
25 30 ART initiation.  
26

27  
28 31 **Results:** Of 215 (out of 220 enrolled) participants who returned for evaluation at six months, 147  
29  
30 32 (66.8%) were female. At six months of follow-up, 89.4% (76/85) of participants with sustained  
31  
32 33 weight gain were virally suppressed compared to 31.8% (7/22) with sustained loss,  $p < 0.001$ . In  
33  
34 34 participants who were lymphopaenic at baseline, an increase to normal total lymphocyte counts at  
35  
36 35 six months was associated with an increase in CD4 count compared to participants who remained  
37  
38 36 lymphopaenic, 96.2% (50/52) vs. 54.8% (17/31),  $p < 0.001$ . At baseline, 50.0% (110/220) had  
39  
40 37 proteinuria. In participants without proteinuria from baseline to six months, 89.8% (79/88) were  
41  
42 38 virally suppressed compared to participants with proteinuria at baseline and/or three months,  
43  
44 39 85.6% (77/90), those with persistent proteinuria, 30.8% (8/26), and proteinuria at six months only,  
45  
46 40 45.5% (5/11),  $p < 0.001$ . In modified Poisson regression, the independent predictors other than CD4  
47  
48 41 cell counts for viral non-suppression at six months among HIV-infected individuals initiating on  
49  
50 42 ART were BMI loss >5% from baseline to six months, {adjusted RR 2.73, 95% CI (1.36-5.47)},  
51  
52  
53  
54  
55  
56  
57

1  
2  
3 43 lymphopaenia at six months, {adjusted RR = 4.54, 95% CI (2.19-9.39)}, and proteinuria at six  
4  
5 44 months {adjusted RR = 2.63, 95% CI (1.25-5.54)}.

6  
7  
8 45 **Conclusions:** Changes in body mass index, total lymphocyte count, and presence of proteinuria  
9  
10 46 can monitor and predict ART response and may be particularly helpful in settings when CD4  
11  
12  
13 47 counts and viral load monitoring are unavailable.

14  
15  
16 48

17  
18  
19  
20  
21  
22  
23  
24  
25  
26  
27  
28  
29  
30  
31  
32  
33  
34  
35  
36  
37  
38  
39  
40  
41  
42  
43  
44  
45  
46  
47  
48  
49  
50  
51  
52  
53  
54  
55  
56  
57  
58  
59  
60

For peer review only

1  
2  
3 **49 Article Summary**  
4  
5

6 **50 Strengths and limitations of this study**  
7

- 8  
9 **51** ➤ We had complete data on 98% of the originally enrolled participants.  
10  
11 **52** ➤ In resource-constrained situations, when viral load and CD4 testing are not easily available,  
12  
13 models such as ours with locally determined easily computable prediction cut-offs can be  
14 **53**  
15 utilized by clinicians to make clinical decisions.  
16 **54**  
17 **55** ➤ Our findings require validation in a study with larger sample size.  
18  
19 **56** ➤ Local (and time-varying) conditions and treatment standards may influence some of the  
20  
21 patterns we observed, both in prevalence and in effect.  
22  
23 **57**  
24  
25  
26 **58**  
27  
28  
29  
30  
31  
32  
33  
34  
35  
36  
37  
38  
39  
40  
41  
42  
43  
44  
45  
46  
47  
48  
49  
50  
51  
52  
53  
54  
55  
56  
57  
58



## 59 Introduction

60 In 2019 about 38 million people were living with HIV globally, with 1.7 million in Tanzania  
61 accounting for an estimated prevalence of 4.8% in the Tanzanian population aged 15-49 years (1).  
62 Viral load testing is the recommended method for monitoring HIV treatment response (2).  
63 However, viral load testing in resource-constrained settings is challenged by limited access, high  
64 costs, unavailability at district levels, and in areas where available, a shortage of reagents,  
65 compounded by challenges with equipment maintenance (3), as happened during the COVID-19  
66 pandemic.

67 There is no doubt that viral load testing is effective in monitoring patient treatment adherence and  
68 HIV resistance. However, in resource-constrained areas that may not always be able to perform  
69 viral load testing, there is a need for readily available and routinely assessed objective measures  
70 that may predict early viral non-suppression or measures that may help with interim evaluation of  
71 patients suspected to have treatment failure who will thereafter need additional follow up with  
72 viral load testing. HIV-infected patients are routinely assessed for weight, height, renal function,  
73 and complete blood counts before initiation of combined antiretroviral treatment (ART). These  
74 assessments are repeated at intervals of three months, six months and biannually after ART  
75 initiation. Adverse changes in such parameters from baseline or subsequently at follow-up visits  
76 provides useful information about treatment responses and may identify a targeted group of  
77 patients to be prioritized for viral load testing before a decision to switch the ART regimen.

78 Routine parameters such as body mass index, total lymphocyte counts, and protein in urine are  
79 easily available and can be evaluated in combination for HIV treatment monitoring. Weight loss  
80 is one of the major manifestations of advanced HIV infection. Factors hypothesized to contribute

1  
2  
3 81 to weight loss include; metabolic alterations, anorexia, malabsorptive disorders, hypogonadism,  
4  
5 82 and excessive cytokine production (4)  
6  
7

8 83 Weight gain following ART initiation may reflect slowed resting energy expenditure resulting  
9  
10 84 from viral suppression and a decrease in HIV enteropathy (5). Weight gain, especially among  
11  
12 85 individuals with low BMI, is associated with improved survival and decreased risk of clinical  
13  
14 86 failure (6). ART responses depend on adherence (7), nutritional status at baseline (8), HIV subtype  
15  
16 87 (9), and ART combination regimen (10). In Port Harcourt, Nigeria, among 318 participants with  
17  
18 88 HIV infection aged  $\geq 18$  years initiated on ART, almost 70% and 55% of participants gained at  
19  
20 89 least 1 kg weight in the first six months and one year of treatment, respectively (11). Previous  
21  
22 90 studies in Tanzania have shown that a decrease in nutrition status within the first three months of  
23  
24 91 ART initiation was associated with mortality (12).  
25  
26  
27  
28  
29

30 92 HIV-associated nephropathy (HIVAN) is the most common renal biopsy finding in HIV-infected  
31  
32 93 patients with a prevalence ranging from 4.7 to 38% (13). Proteinuria and elevated creatinine have  
33  
34 94 been associated with AIDS-defining illness and death (14). Urine assessment for protein by  
35  
36 95 dipstick can detect renal disease and progression, especially as renal biopsy, an invasive procedure,  
37  
38 96 is not readily available in most resource-constrained settings.  
39  
40  
41

42 97 HIV is associated with progressive destruction of CD4+ T-helper lymphocytes responsible for the  
43  
44 98 profound immunodeficiency that underlies AIDS (15). As CD4 cells are a subset of lymphocytes,  
45  
46 99 any significant change in CD4 cells will cause a parallel change in total lymphocyte counts (16).  
47  
48  
49 100 This study aimed at assessing the following routinely accessible parameters: body mass index,  
50  
51 101 proteinuria, and total lymphocyte counts (TLC), and their patterns of change in monitoring HIV  
52  
53 102 treatment responses at six months following ART initiation.  
54  
55  
56  
57

## 103 **Methods**

### 104 **Study design and population**

105 This cohort study was conducted in three urban care and treatment centres (CTC) in Temeke  
106 district, Dar es Salaam: Temeke regional referral hospital, Mbagala Rangi-tatu district hospital,  
107 and Mbagala Kizuiani dispensary between September 2018 to April 2019. The centres were chosen  
108 due to large numbers of ART naïve clients, amounting to 60 or more per clinic per month. The  
109 sites have an organized CTC and follow up plan for clients. Participants were initiated on ART  
110 based on the Tanzanian National guidelines (17) with a default regimen of tenofovir, lamivudine  
111 and efavirenz unless contraindicated.

### 112 **Sample size estimation**

113 To determine the minimum detectable relative risks with the power of 80% in univariate analysis  
114 for this observational study for which the sample size was determined by practical considerations,  
115 we used total number of cases between 40 and 50 and group numbers (rounded to 5) similar to the  
116 exposed groups: 115 for stable BMI, 20 for decreased BMI, 35 for lymphopaenia and proteinuria  
117 at 6 months, 80 for age over 40, 145 for female sex, 45 for secondary education or higher, 100 for  
118 employment, 115 for never married, 80 for stage greater than 1. In all cases but BMI, the size of  
119 the reference group was considered to be 215 - the number in the exposed group, except that 80  
120 (gain) was used for the pairwise comparisons of BMI change. The minimum detectable risk ratios  
121 were 3.77, 2.56, 2.94, 2.94, 2.74, 2.59 (or <0.12), 2.47, and 2.44, respectively.

### 122 **Data collection**

123 We used an interviewer-based structured tool to conduct face-to-face interviews to obtain socio-  
124 demographic and baseline characteristics such as age, sex, occupation, the highest level of

1  
2  
3 125 education attained, marital status, and clinically assessed the participant's WHO HIV clinical  
4  
5 126 stage. A participant's baseline weight was measured using a SECA weighing scale recording to  
6  
7 127 the nearest 0.5 kg and height using a wall stadiometer recording to the nearest 0.5 cm. Body mass  
8  
9 128 index was then computed by dividing the weight in kg by the height in meters squared, the  
10  
11 129 interpretation of which was adapted from WHO (18).

12  
13  
14  
15 130 About 10ml of venous blood was collected aseptically from each participant; 5ml for CD4 cell  
16  
17 131 counts, analysed using BD FACSCount™ (Becton Dickenson, USA) and 5ml for complete blood  
18  
19 132 count to obtain the total lymphocyte counts, analyzed by an auto-analyzer (Cell DNY1800 from  
20  
21 133 Abbott Diagnostics Division, USA). TLC was categorized as lymphopaenia ( $<1 \times 10^9/L$ ), normal  
22  
23 134 lymphocyte ( $1 \times 10^9/L$  to  $4 \times 10^9/L$ ), and lymphocytosis ( $>4.0 \times 10^9/L$ ). We assessed for proteinuria  
24  
25 135 by collecting about 15ml of a fresh urine sample from each participant into an empty, clean, dry  
26  
27 136 container and tested using CYBOW™ strips (DFI Co. Ltd, Korea). Proteinuria was categorized as  
28  
29 137 negative proteinuria (no proteinuria), trace or 1+ proteinuria (equivalent to 30 to 100 mg/dl), 2+  
30  
31 138 proteinuria (equivalent to 100 to 300 mg/dl), 3+ proteinuria (equivalent to 300 to 1000 mg/dl), and  
32  
33 139 4+ proteinuria (equivalent to greater than 1000 mg/dl).

34  
35  
36  
37  
38  
39 140 At three and six months after ART initiation, a repeat assessment of participants was done for CD4  
40  
41 141 cell counts, TLC, proteinuria, and weight. At six months, an additional 5ml of blood was collected  
42  
43 142 from each study participant for viral load measurement using the Abbott RealTime HIV-1 assay.  
44  
45 143 Participants were classified as virally suppressed at six months after ART initiation if their HIV  
46  
47 144 viral load was  $<1000$  copies/ml, according to Tanzania HIV treatment guidelines. Levels and  
48  
49 145 changes in BMI, lymphocytes, and proteinuria were compared between participants who were HIV  
50  
51 146 suppressed and that of HIV not suppressed.

1  
2  
3 147 BMI was considered to have changed between one time point and another if it increased or  
4  
5 148 decreased by over 5%. BMI changes from ART initiation to six months were categorized into three  
6  
7  
8 149 groups as (i) loss of more than 5%, (ii) stable (change between -5% and 5%, or (iii) gain of more  
9  
10 150 than 5%. The TLC were categorized as (i) lymphopaenia  $< 1 \times 10^9$  cells/L, (ii) normal lymphocyte  
11  
12 151 count  $1-4 \times 10^9$  cells/L (iii) Lymphocytosis  $> 4 \times 10^9$  cells/L. The TLC pattern change was  
13  
14  
15 152 categorized as (i) lymphopaenic at 6 months, regardless of the status at baseline or three months;  
16  
17 153 (ii) increased from lymphopaenic to normal or higher; (iii) stayed normal or higher (no  
18  
19 154 lymphopaenia seen). Urinary protein patterns were categorized as (i) proteinuria at six months  
20  
21  
22 155 regardless of baseline proteinuria status; (ii) proteinuria at baseline and/or third month but not six  
23  
24 156 months; and (iii) no proteinuria seen.

### 25 26 27 157 **Patient and public involvement**

28  
29  
30 158 Patients or members of the public were not involved in the design, or conduct, or reporting, or  
31  
32 159 dissemination plans of the research.

### 33 34 35 160 **Statistical methods**

36  
37  
38 161 Data were analysed using IBM® SPSS® Statistics version 26, R, and SAS version 9.4 (Cary, NC).  
39  
40 162 Categorical variables such as age group, sex, marital status, level of education, occupation,  
41  
42 163 categories of BMI, CD4 count, proteinuria, TLC, BMI change, TLC change, and proteinuria  
43  
44 164 change were summarized as frequencies and proportions. Continuous variables such as age, BMI,  
45  
46 165 and CD4 count were summarized as means and standard deviations. When necessary, small groups  
47  
48 166 were combined for analysis. To determine the association between BMI, TLC or urine protein to  
49  
50  
51 167 CD4 count, we used correlation.

1  
2  
3 168 To determine the relationships between individual predictors and viral non-suppression at six  
4  
5 169 months, we first used modified Poisson regression for univariable analysis, to determine which  
6  
7 170 variables to include in the multivariable model. For multivariable prediction, all predictors in the  
8  
9 171 univariable model with a p-value of  $<0.2$  and age, a known confounder, were entered into the  
10  
11 172 modified Poisson regression model. The results of the Poisson regression model were presented  
12  
13 173 as relative risk and 95% confidence interval (RR; 95% CI). To determine the test characteristics  
14  
15 174 (sensitivity, specificity, positive predictive value (PPV), negative predictive value (NPV)) of a  
16  
17 175 score based on the multivariable model, we used two cut-off levels, based on the first quartile and  
18  
19 176 median of the score among the non-suppressed. The score was the sum of the rounded coefficients  
20  
21 177 for the variables for which the confidence intervals did not include 1 in a model containing only  
22  
23 178 these variables. Since these all rounded to 1, this is equivalent to simply counting the number of  
24  
25 179 these characteristics.

26  
27 180 Based on practices in low resourced clinics, communication with the patient and the decision to  
28  
29 181 change the ART regimen depends on the patient's virological status at six months. CD4 cell counts  
30  
31 182 depend on a blood sample collected at the six-month visit and are therefore unavailable for  
32  
33 183 immediate decision making. We, therefore, excluded all CD4 variables from the model and used  
34  
35 184 parameters available at the time of the six-month visit to predict viral non-suppression.  
36  
37  
38  
39  
40  
41  
42  
43  
44  
45  
46  
47  
48  
49  
50  
51  
52  
53  
54  
55  
56  
57

185

## Results

186 A total of 220 participants were enrolled in the study over a month, and each participant was  
 187 followed up for six months. Two participants were lost to follow up at three months, two died  
 188 before six months of follow up, and one participant, a long-distance truck driver, was out of the  
 189 country at the time of the 6-month follow up. Therefore, our analysis data set includes the  
 190 remaining 215 participants. Details of enrolment are shown in Fig 1.

191

192

193 **Figure 1. Consort diagram.**

194

195

### 196 **Baseline characteristics of study participants**

197 Of the 215 participants analysed, the mean age (SD) was  $37.1 \pm 11.5$  years, 146 (68%) were female,  
 198 113 (53%) were never married, 45 (21%) had secondary education or higher, and 117 (54%) were  
 199 unemployed (Table 1). Most participants, 59.5%, had normal BMI, while 27% were overweight,  
 200 and 13% were underweight. Most participants, 113 (62%), were in WHO HIV clinical stage I, and  
 201 only eight (4%) were in stage IV, though 93 (43%) had CD4 counts of 350 cells/ml or below; 83  
 202 (39%) were lymphopaenic, and 111 (52%) had proteinuria at baseline.

203

204 **Table 1. Baseline characteristics of 215 study participants initiating ART, Dar es Salaam,**  
 205 **Tanzania, 2019.**

| Characteristic    | n (%)      | Mean $\pm$ SD   |
|-------------------|------------|-----------------|
| Age (years)       |            | $37.1 \pm 11.5$ |
| Age group (years) |            |                 |
| 18 – 30           | 69 (32.1%) |                 |

|                                                   |                       |              |            |
|---------------------------------------------------|-----------------------|--------------|------------|
|                                                   | 31 – 40               | 72 (33.5%)   |            |
|                                                   | 41 – 50               | 45 (20.9%)   |            |
|                                                   | >51                   | 29 (13.5%)   |            |
| <b>Sex</b>                                        |                       |              |            |
|                                                   | Female                | 146 (67.9%)  |            |
|                                                   | Male                  | 69 (32.1 %)  |            |
| <b>Level of education</b>                         |                       |              |            |
|                                                   | No education          | 10 (4.7%)    |            |
|                                                   | Primary education     | 160 (74.4%)  |            |
|                                                   | Secondary education   | 42 (19.5%)   |            |
|                                                   | Higher education      | 3 (1.4%)     |            |
| <b>Employment Status</b>                          |                       |              |            |
|                                                   | Not employed          | 117 (54.4%)  |            |
|                                                   | Employed              | 98 (45.6%)   |            |
| <b>Marital status</b>                             |                       |              |            |
|                                                   | Ever married          | 102 (47.4%)  |            |
|                                                   | Never married         | 113 (52.6%)  |            |
| <b>Body mass index (kg/m<sup>2</sup>)</b>         |                       |              | 22.9 ± 4.3 |
|                                                   | Underweight           | 28 (13.0%)   |            |
|                                                   | Normal weight         | 128 (59.5%)  |            |
|                                                   | Overweight/Obese      | 59 (27.4%)   |            |
| <b>WHO HIV clinical stages</b>                    |                       |              |            |
|                                                   | Stage I               | 133 (61.9%)  |            |
|                                                   | Stage II              | 30 (14.0%)   |            |
|                                                   | Stage III             | 44 (20.5%)   |            |
|                                                   | Stage IV              | 8 (3.7%)     |            |
| <b>CD4 cell counts (cells/mm<sup>3</sup>)</b>     |                       |              | 401 ± 253  |
|                                                   | <200                  | 55 (25.6%)   |            |
|                                                   | 200-350               | 38 (17.7%)   |            |
|                                                   | 351-500               | 39 (18.1%)   |            |
|                                                   | >500                  | 83 (38.6%)   |            |
| <b>Lymphocyte counts (x10<sup>9</sup>cells/L)</b> |                       |              | 1.6 ± 1.2  |
|                                                   | <1                    | 83 (38.6%)   |            |
|                                                   | 1-4                   | 126 (58.6%)  |            |
|                                                   | >4                    | 6 (2.8%)     |            |
| <b>Proteinuria</b>                                |                       |              |            |
|                                                   | No proteinuria        | 104 (48.4 %) |            |
|                                                   | 1+ (30 – 100 mg/dl)   | 80 (37.2%)   |            |
|                                                   | 2+ (100 – 300 mg/dl)  | 27 (12.6%)   |            |
|                                                   | 3+ (300 – 1000 mg/dl) | 4 (1.9%)     |            |



206 CD4: Cluster of differentiation 4; HIV: Human Immunodeficiency Virus; SD: Standard Deviation

207

208

209 **Table 2. Predictors of HIV viral load non-suppression at six months among 215**  
 210 **participants initiating ART, Dar es Salaam, Tanzania, 2019.**

| Variable                                                         | Total | HIV non-suppression at six months n (%) | RR (95% CI)       | Adjusted RR (95% CI) |
|------------------------------------------------------------------|-------|-----------------------------------------|-------------------|----------------------|
| <b>Age (years)</b>                                               |       |                                         |                   |                      |
| < 40                                                             | 136   | 26 (19%)                                | 1                 | 1                    |
| ≥40                                                              | 79    | 20 (25%)                                | 1.32 (0.79-2.21)  | 1.43 (0.91-2.26)     |
| <b>Sex</b>                                                       |       |                                         |                   |                      |
| Female                                                           | 146   | 35 (24%)                                | 1.50 (0.81-2.78)  | 1.27 (0.73-2.20)     |
| Male                                                             | 69    | 11 (16%)                                | 1                 | 1                    |
| <b>Level of Education</b>                                        |       |                                         |                   |                      |
| Primary or less                                                  | 170   | 37 (22%)                                | 1                 |                      |
| Secondary or higher                                              | 45    | 9 (20%)                                 | 0.92 (0.48-1.76)  |                      |
| <b>Employment Status</b>                                         |       |                                         |                   |                      |
| Not employed                                                     | 117   | 24 (21%)                                | 1                 |                      |
| Employed                                                         | 98    | 22 (22%)                                | 1.09 (0.66-1.83)  |                      |
| <b>Marital status</b>                                            |       |                                         |                   |                      |
| Never married                                                    | 113   | 19 (17%)                                | 1                 | 1                    |
| Ever married                                                     | 102   | 27 (26%)                                | 1.57 (0.93-2.66)  | 1.34 (0.84-2.16)     |
| <b>Body mass index</b>                                           |       |                                         |                   |                      |
| <b>Change from baseline to three months</b>                      |       |                                         |                   |                      |
| Loss >5%                                                         | 28    | 17 (61%)                                | 4.93 (2.41-10.09) |                      |
| Stable                                                           | 122   | 21 (17%)                                | 1.40 (0.66-2.99)  |                      |
| Gain >5 %                                                        | 65    | 8 (12%)                                 | 1                 |                      |
| <b>Change from baseline to six months</b>                        |       |                                         |                   |                      |
| Loss >5%                                                         | 20    | 16 (80%)                                | 7.11 (3.69-13.69) | 2.73 (1.36-5.47)     |
| Stable                                                           | 115   | 21 (18%)                                | 1.62 (0.78-3.36)  | 1.87 (0.95-3.68)     |
| Gain >5 %                                                        | 80    | 9 (11%)                                 | 1                 | 1                    |
| <b>HIV clinical stage</b>                                        |       |                                         |                   |                      |
| I                                                                | 133   | 24 (18%)                                | 1                 | 1                    |
| II                                                               | 30    | 8 (27%)                                 | 1.48 (0.74-2.97)  | 1.14 (0.63-2.08)     |
| III and IV                                                       | 52    | 14 (27%)                                | 1.49 (0.84-2.66)  | 0.82 (0.51-1.31)     |
| <b>Total lymphocyte count change from baseline to six months</b> |       |                                         |                   |                      |

|                                                                   |     |          |                   |                  |
|-------------------------------------------------------------------|-----|----------|-------------------|------------------|
| Ended lymphopaenic                                                | 37  | 27 (73%) | 7.66 (4.32-13.60) | 4.54 (2.19-9.39) |
| Lymphopaenic to normal                                            | 52  | 7 (13%)  | 1.41 (0.59-3.40)  | 1.59 (0.66-3.80) |
| Lymphopaenia not seen                                             | 126 | 12 (10%) | 1                 | 1                |
| <b>Pattern of change in proteinuria</b>                           |     |          |                   |                  |
| Proteinuria at 6 months regardless of baseline proteinuria status | 37  | 24 (65%) | 6.73 (3.34-13.58) | 2.63 (1.25-5.54) |
| Proteinuria at baseline and/or 3 months but not 6 months          | 95  | 14 (15%) | 1.53 (0.67-3.47)  | 1.26 (0.62-2.57) |
| No proteinuria seen                                               | 83  | 8 (10%)  | 1                 | 1                |

211 CI: confidence interval; RR: relative risk; ART: antiretroviral therapy.

212 Univariable and multivariable analysis by modified Poisson regression.

213

214 BMI and CD4 count were directly correlated at baseline, 3, and 6 months. TLC and CD4 count  
 215 were moderately positively correlated; while urine protein and CD4 count were inversely  
 216 correlated (see Supplementary Figures 1, 2, and 3 in Additional file 1).

217

### 218 **Predictors of viral non-suppression at six months among HIV-infected participants** 219 **initiated on ART**

220 Only 46 participants (21%) were not virally suppressed at six months. The strongest clinical  
 221 predictors of viral non-suppression in the multivariable analysis were lymphopaenia at six months  
 222 irrespective of baseline lymphocyte status, with 73% of participants with lymphopaenia at six  
 223 months not being suppressed. After adjusting for other factors, lymphopaenia at six months was  
 224 associated with HIV non-suppression {RR = 4.54, 95% CI (2.19-9.39)}. Among participants with  
 225 a drop in body mass index at six months of 5% or more from baseline, 80% were non-suppressed  
 226 {RR = 2.73; 95% CI (1.36-5.47)}. The risk of HIV non-suppression at six months was higher

1  
2  
3 227 among participants with proteinuria at six months {RR = 2.63; 95% CI (1.25-5.54)}, Table 2. The  
4  
5 228 area under the Receiver Operating Characteristic (ROC) curve for the multivariable model was  
6  
7 229 0.895 (Fig 2). Baseline HIV stage was not related to HIV non-suppression at six months, {adjusted  
8  
9  
10 230 RR = 1.14, 95% CI (0.63-2.08)} for baseline WHO HIV clinical stage II and {adjusted RR = 0.82,  
11  
12 231 95% CI (0.51-1.31)} for advanced baseline WHO HIV clinical stages (III and IV)}.

13  
14  
15 232 Using the rounded coefficients of the three variables in a model containing only these variables,  
16  
17 233 which all rounded to 1, we made a “prediction score” with values 0 (n=154, of which 10 were non-  
18  
19 234 suppressed), 1 (n=36, 13 non-suppressed), 2 (n=17, 15 non-suppressed), and 3 (n=8, all non-  
20  
21 235 suppressed). The median value of this score among the non-suppressed was 1.5 and the first  
22  
23 236 quartile value was 1. Thus, having any 2 of the risk factors would be a conservative predictor of  
24  
25  
26 237 non-suppression, and having any one would be less conservative.

1  
2  
3 238 **Figure 2. Receiver Operating Characteristic curve assessing a model using BMI decrease,**  
4  
5 239 **proteinuria, and total lymphocyte counts to predict viral non-suppression among HIV-**  
6  
7 240 **infected individuals initiated on ART in Dar es Salaam, Tanzania, 2019**  
8  
9

10  
11 241  
12  
13 242  
14  
15  
16  
17 243 Using the median score among the non-suppressed as a cut-off (equivalent to having any two of  
18  
19 244 the components), the sensitivity predicting non-suppression was 0.50, and the specificity was 0.99.  
20  
21 245 Only 12% of the study population met this criterion. When we lowered the cut-off scores to the  
22  
23 246 first quartile value among the non-suppressed (i.e. any one of the components), the sensitivity was  
24  
25 247 0.78 and the specificity was 0.85, with 28% of the study population meeting this criterion.  
26  
27  
28

29 248  
30  
31  
32  
33  
34  
35  
36  
37  
38  
39  
40  
41  
42  
43  
44  
45  
46  
47  
48  
49  
50  
51  
52  
53  
54  
55  
56  
57

## 249 Discussion

250 This cohort study recruited ART naïve HIV-infected individuals from three care and treatment  
251 centres in Dar es Salaam, Tanzania, with the aim of assessing the utility of total lymphocyte count,  
252 body mass index, and proteinuria in predicting ART responses at six months. The intention of this  
253 study is not to replace CD4 cell count testing and HIV viral load monitoring but to assist clinicians  
254 when faced with decision making if these standard monitoring parameters are not easily accessible.  
255 Contrary to earlier studies done when the ART medications were not as effective as the current  
256 ones (12), patient characteristics at ART initiation did not affect the probability of viral non-  
257 suppression at six months, whereas patterns of change and the patient's status at 6 months were  
258 highly predictive.

259 Baseline WHO HIV clinical stage did not help predict HIV non-suppression at six months,  
260 possibly because under the current "Test and Treat" strategy (19), most individuals initiating ART  
261 are in WHO HIV clinical stages I and II (76% of our sample). Current therapy is highly effective  
262 except for a few patients whose disease is so advanced that they die before the medication can  
263 improve their immune status (2 patients in this study). Symptomatic individuals with advanced  
264 HIV will likely adhere to treatment to alleviate their symptoms. Perhaps patients with advanced  
265 disease fear death and therefore are motivated to adhere to ART, with eventual viral suppression.  
266 Advanced HIV disease has been shown to be linked with ART adherence (20). Some studies,  
267 however, indicate that early HIV stages are linked with high ART adherence and viral suppression  
268 (21).

269 Lymphopaenia at six months, a decrease in body mass index of 5% or more from baseline, and  
270 proteinuria predicted HIV non-suppression at six months. Lymphopaenia at six months was the  
271 strongest predictor for HIV non -suppression at six months. Lymphopaenia at six months predicted

1  
2  
3 272 HIV non-suppression irrespective of a participant's lymphocyte count (normal or low) before ART  
4  
5 273 initiation. CD4 cells are a subset of lymphocytes and therefore lymphopaenia could be indicative  
6  
7 274 of a decline in CD4 cells, as a result of high HIV replication with high viral load signifying viral  
8  
9 275 non-suppression with consequent CD4 cell destruction. Lymphopaenia was significantly  
10  
11 276 associated with CD4 <500 cells/mm<sup>3</sup> at all time points. In this study, an increase in total  
12  
13 277 lymphocyte cell count from lymphopaenia to normal lymphocyte counts from baseline to six  
14  
15 278 months was significantly associated with an increase in CD4 cell count (Additional file 1). Total  
16  
17 279 lymphocyte count is sensitive and specific in predicting CD4 cell counts (16,23) though there have  
18  
19 280 been contradictory reports (23). The assessment of total lymphocyte counts among patients on  
20  
21 281 ART, therefore, could serve as an alternative, especially in settings with limited availability of  
22  
23 282 CD4 cell count measurement. A drop in total lymphocyte count in such a setting can alert a  
24  
25 283 clinician to the likelihood of immunological failure.

26  
27 284 Weight loss with consequent BMI drop of 5% or more at six months while on ART from weight  
28  
29 285 prior to ART initiation, predicts HIV non-suppression, though HIV non-suppression was not  
30  
31 286 associated with being underweight prior to ART initiation, perhaps because of the low prevalence  
32  
33 287 of underweight leading to low power. In this study, sustained weight gain was significantly  
34  
35 288 associated with viral suppression and sustained weight loss was associated with viral non-  
36  
37 289 suppression at six months of ART. An increase in weight and hence BMI may be a sign of immune  
38  
39 290 status improvement signalling a return to health (24) and improved survival (25), while a decrease  
40  
41 291 in weight and hence BMI may be a sign of HIV progression or decline in CD4 cell counts (5,11,27).  
42  
43 292 Weight loss may be due to HIV itself, opportunistic infections, or HIV-associated tumours. Weight  
44  
45 293 loss in both ART naïve and exposed patients has been associated with increased morbidity and  
46  
47 294 mortality (28,29,30). A study in England observed that each log<sub>10</sub> increase in HIV viral load was

1  
2  
3 295 associated with a 0.92 kg decrease in body weight. However, a decrease in viral load was not  
4  
5 296 significantly associated with weight gain, contrary to our study (30). Since weight changes  
6  
7  
8 297 correlate with the virological response, losing weight should be viewed as an alarming sign of  
9  
10 298 virological failure. Monitoring of weight and body mass index prior to ART initiation and during  
11  
12 299 follow up is a valuable inexpensive way of identifying individuals with possible treatment failure.  
13  
14  
15 300 Half of the ART-naïve study participants had proteinuria, similar to a report from Zimbabwe (31).  
16  
17 301 The presence of proteinuria was associated with HIV non-suppression. Proteinuria at six months  
18  
19  
20 302 was a strong predictor for HIV non-suppression. Proteinuria in HIV-infected individuals is  
21  
22 303 attributed to a direct effect of HIV on the glomerular and tubular epithelial cells with the  
23  
24 304 progression of HIV disease to AIDS, nephrotoxicity from ART, the progression of chronic kidney  
25  
26 305 disease and death (14,33). The higher the viral load, the greater the damage to the kidney (33). We  
27  
28  
29 306 observed a significant proportion of participants with proteinuria of 2+ or above in WHO HIV  
30  
31 307 clinical stage IV. This underscores the fact that, as HIV disease advances, the greater the damage  
32  
33  
34 308 to the kidneys as evidenced by increasing proteinuria. Therefore, routine screening for renal  
35  
36 309 disease may serve not only as a follow-up of renal disease progression but also for HIV treatment  
37  
38 310 response monitoring.  
39  
40  
41  
42  
43

## 312 **Conclusion**

44  
45  
46  
47 313 A drop in BMI by more than 5%, persistent lymphopaenia or decrease in total lymphocyte count  
48  
49 314 to lymphopaenia, and proteinuria at six months are associated with HIV non-suppression at 6  
50  
51 315 months after ART initiation. Scores based on these parameters can serve as alternatives to CD4  
52  
53  
54 316 cell counts and viral load assessment in facilities with scarcity.  
55  
56  
57

1  
2  
3 317 **List of abbreviations**  
4  
5

6 318 AIDS: Acquired immunodeficiency syndrome  
7

8  
9 319 ART: Antiretroviral therapy  
10

11  
12 320 BMI: Body mass index  
13

14  
15 321 CD4: Cluster of differentiation 4  
16

17  
18 322 HIV: Human immunodeficiency virus  
19

20  
21 323 TLC: Total lymphocyte counts  
22

23  
24 324 WHO: World Health Organization  
25

26  
27 325  
28

29  
30 326  
31

32  
33 327 **Acknowledgements**  
34

35  
36 328 We are grateful to the participants for their willingness to take part in this study and to the health  
37

38 329 workers from Temeke regional referral hospital, Mbagala Rangi-tatu district hospital, and  
39

40 330 Mbagala Kizuiani dispensary for their assistance in participant recruitment and data collection.  
41  
42

43 331 **Author Contributions**  
44

45  
46 332 Study design: LJ and PM; data collection: LJ and PM; Data analysis and interpretation: LJ, PM,  
47

48 333 BT and EH; Manuscript writing: LJ, PM, BT and EH. All the authors gave final approval of the  
49

50  
51 334 manuscript.  
52  
53

54 335  
55  
56  
57



1  
2  
3 336 **Funding**  
4  
5

6 337 This research received no specific grant from any funding agency in the public, commercial or  
7  
8 338 not-for-profit sectors.  
9

10  
11 339 **Competing interests**  
12  
13

14 340 None declared.  
15

16  
17 341 **Patient consent for publication**  
18  
19

20 342 Not applicable.  
21  
22

23 343 **Ethics approval**  
24  
25

26 344 Ethical approval was obtained from the Research and Publications Committee of Muhimbili  
27  
28 345 University of Health and Allied Sciences (Ref. No. DA.287/298/01A). Permission to conduct the  
29  
30 346 study was obtained from Temeke Municipal Hospital administration. Participants were enrolled  
31  
32 347 after providing written informed consent. The confidentiality of patient information was ensured.  
33  
34 348 Participants without viral suppression at the 6<sup>th</sup> month of follow up were managed according to  
35  
36 349 Tanzania National Guidelines for management of HIV and AIDS.  
37  
38  
39  
40

41 350 **Data availability statement**  
42  
43

44 351 The dataset analysed during the current study is available upon reasonable request to the  
45  
46 352 corresponding author.  
47  
48

49 353 **ORCID iDs**  
50  
51

52 354 Basil Tumaini: <https://orcid.org/0000-0002-2894-1684>  
53

54 355 Ellen Hertzmark: <https://orcid.org/0000-0003-0148-2761>  
55  
56  
57

1  
2  
3 356 **Ethics Statement**  
4

5  
6 357 Muhimbili University of Health and Allied Sciences Institutional Review Board with reference  
7  
8 358 number DA287/298/01A/  
9

10 359

11  
12 360 **References**  
13

- 14  
15 361 1. UNAIDS. UNAIDS data 2020 | UNAIDS [Internet]. 2020 [cited 2020 Aug 19].  
16  
17 <https://www.unaids.org/en/resources/documents/2020/unaid-data>  
18 362  
19  
20  
21 363 2. World Health Organization. Consolidated guidelines on the use of antiretroviral drugs for  
22  
23 364 treating and preventing HIV infection: recommendations for a public health approach.  
24  
25 365 World Health Organization; 2016.  
26  
27 [https://apps.who.int/iris/bitstream/handle/10665/208825/9789241549684\\_eng.pdf](https://apps.who.int/iris/bitstream/handle/10665/208825/9789241549684_eng.pdf)  
28 366  
29  
30  
31 367 3. Roberts T, Bygrave H, Fajardo E, Ford N. Challenges and opportunities for the  
32  
33 368 implementation of virological testing in resource-limited settings. *Journal of the*  
34  
35 369 *International AIDS Society*. 2012;15(2):17324. <https://doi.org/10.7448/IAS.15.2.17324>  
36  
37 370 PMID: 23078767  
38  
39  
40  
41 371 4. Sepkowitz KA. AIDS - the first 20 years. *New England Journal of Medicine*.  
42  
43 372 2001;344(23):1764-72. <https://www.nejm.org/doi/full/10.1056/NEJM200106073442306>  
44  
45 373 PMID: 11396444  
46  
47  
48 374 5. Mangili A, Murman DH, Zampini AM, Wanke CA, Mayer KH. Nutrition and HIV  
49  
50 375 infection: review of weight loss and wasting in the era of highly active antiretroviral  
51  
52 376 therapy from the nutrition for healthy living cohort. *Clinical Infectious Diseases*.  
53  
54 377 2006;42(6):836-42. <https://doi.org/10.1086/500398> PMID: 16477562  
55  
56  
57

- 1  
2  
3 378 6. Koethe JR, Lukusa A, Giganti MJ, Chi BH, Nyirenda CK, Limbada MI, et al. Association  
4  
5 379 between weight gain and clinical outcomes among malnourished adults initiating  
6  
7 380 antiretroviral therapy in Lusaka, Zambia. *Journal of Acquired Immune Deficiency*  
8  
9 381 *Syndromes*. 2010;53(4):507-13.  
10  
11  
12 382 [https://journals.lww.com/jaids/Fulltext/2010/04010/Association\\_Between\\_Weight\\_Gain\\_](https://journals.lww.com/jaids/Fulltext/2010/04010/Association_Between_Weight_Gain_and_Clinical.12.aspx)  
13  
14 383 [and\\_Clinical.12.aspx](https://journals.lww.com/jaids/Fulltext/2010/04010/Association_Between_Weight_Gain_and_Clinical.12.aspx) PMID: 19730111  
15  
16  
17 384 7. Mannheimer S, Friedland G, Matts J, Child C, Chesney M. The consistency of adherence  
18  
19 385 to antiretroviral therapy predicts biologic outcomes for Human Immunodeficiency Virus -  
20  
21 386 infected persons in clinical trials. *Clinical Infectious Diseases*. 2002;34(8):1115-21.  
22  
23  
24 387 <https://doi.org/10.1086/339074> PMID: 11915001  
25  
26  
27 388 8. Paton NI, Sangeetha S, Earnest A, Bellamy R. The impact of malnutrition on survival and  
28  
29 389 the CD4 count response in HIV-infected patients starting antiretroviral therapy. *HIV*  
30  
31 390 *medicine*. 2006;7(5):323-30. <https://doi.org/10.1111/j.1468-1293.2006.00383.x> PMID:  
32  
33 391 16945078  
34  
35  
36  
37 392 9. Wittkop L, Arsandaux J, Trevino A, Schim van der Loeff M, Anderson J, van Sighem A,  
38  
39 393 et al. CD4 cell count response to first-line combination ART in HIV-2+ patients compared  
40  
41 394 with HIV-1+ patients: a multinational, multicohort European study. *Journal of*  
42  
43 395 *Antimicrobial Chemotherapy*. 2017;72(10):2869-78. <https://doi.org/10.1093/jac/dkx210>  
44  
45 396 PMID: 29091198  
46  
47  
48  
49 397 10. Kanya MR, Mayanja-Kizza H, Kambugu A, Bakeera-Kitaka S, Semitala F, Mwebaze-  
50  
51 398 Songa P, et al. Predictors of long-term viral failure among Ugandan children and adults  
52  
53 399 treated with antiretroviral therapy. *Journal of Acquired Immune Deficiency Syndromes*.  
54  
55  
56  
57  
58  
59  
60

1  
2  
3 400 2007;46(2):187-93. PMID: 17693883  
4  
5

6 401 11. Olaleye AO, Owhonda G, Daramola O, Adejo I, Olayiwola H, Inyang JI, et al. Factors  
7 associated with weight gain among adult patients initiating antiretroviral therapy in Port  
8 402 Harcourt, Nigeria: a retrospective cohort study. *Infectious Diseases*. 2017;49(8):635-8.  
9 403 <https://doi.org/10.1080/23744235.2017.1306102> PMID: 28335659  
10 404

11 405 12. Liu E, Spiegelman D, Semu H, Hawkins C, Chalamilla G, Aveika A, et al. Nutritional  
12 status and mortality among HIV-infected patients receiving antiretroviral therapy in  
13 406 Tanzania. *Journal of Infectious Diseases*. 2011;204(2):282-90.  
14 407 <https://doi.org/10.1093/infdis/jir246> PMID: 21673040  
15 408

16 409 13. Husain NE, Ahmed MH, Almobarak AO, Noor SK, Elmadhoun WM, Awadalla H, et al.  
17 HIV-associated nephropathy in Africa: pathology, clinical presentation and strategy for  
18 410 prevention. *Journal of Clinical Medicine Research*. 2018;10(1):1-8.  
19 411 <https://doi.org/10.14740/jocmr3235w> PMID: 29238427  
20 412

21 413 14. Szczech LA, Hoover DR, Feldman JG, Cohen MH, Gange SJ, Goozé L, et al. Association  
22 414 between renal disease and outcomes among HIV-infected women receiving or not  
23 415 receiving antiretroviral therapy. *Clinical Infectious Diseases*. 2004;39(8):1199-206.  
24 416 <https://doi.org/10.1086/424013> PMID: 15486845  
25 417

26 418 15. Imlach S, McBreen S, Shirafuji T, Leen C, Bell JE, Simmonds P. Activated peripheral  
27 419 CD8 lymphocytes express CD4 in vivo and are targets for infection by Human  
28 420 Immunodeficiency Virus Type 1. *Journal of Virology*. 2001;75(23):11555-64.  
29 421 <https://doi.org/10.1128/JVI.75.23.11555-11564.2001> PMID: 11689637  
30 422

31 423 16. Obirikorang C, Quaye L, Acheampong I. Total lymphocyte count as a surrogate marker  
32 424  
33 425  
34 426  
35 427  
36 428  
37 429  
38 430  
39 431  
40 432  
41 433  
42 434  
43 435  
44 436  
45 437  
46 438  
47 439  
48 440  
49 441  
50 442  
51 443  
52 444  
53 445  
54 446  
55 447  
56 448  
57 449  
58 450  
59 451  
60 452

- 1  
2  
3 422 for CD4 count in resource-limited settings. BMC Infectious Diseases. 2012;12:128.  
4  
5 423 <https://doi.org/10.1186/1471-2334-12-128> PMID: 22676809  
6  
7  
8 424 17. The United Republic of Tanzania; Ministry of Health, Community Development, Gender,  
9  
10 425 Elderly and Children; National AIDS Control Programme. National guidelines for the  
11  
12 426 management of HIV and AIDS. 6th Ed, 2017. Available from:  
13  
14 427 [https://www.differentiatedservicedelivery.org/Portals/0/adam/Content/NqQGryocrU2RTj5](https://www.differentiatedservicedelivery.org/Portals/0/adam/Content/NqQGryocrU2RTj58iR37uA/File/Tanzania_NATIONAL_GUIDELINES_FOR_MANAGEMENT_OF_HIV_AND_AIDS_6TH_EDITION_2017.pdf)  
15  
16 428 [8iR37uA/File/Tanzania\\_NATIONAL GUIDELINES FOR MANAGEMENT OF HIV](https://www.differentiatedservicedelivery.org/Portals/0/adam/Content/NqQGryocrU2RTj58iR37uA/File/Tanzania_NATIONAL_GUIDELINES_FOR_MANAGEMENT_OF_HIV_AND_AIDS_6TH_EDITION_2017.pdf)  
17  
18 429 [AND AIDS 6TH EDITION 2017.pdf](https://www.differentiatedservicedelivery.org/Portals/0/adam/Content/NqQGryocrU2RTj58iR37uA/File/Tanzania_NATIONAL_GUIDELINES_FOR_MANAGEMENT_OF_HIV_AND_AIDS_6TH_EDITION_2017.pdf)  
19  
20  
21  
22 430 18. World Health Organization. Obesity: preventing and managing the global epidemic. WHO  
23  
24 431 Technical Report Series. 2000(894).  
25  
26 432 [https://www.who.int/nutrition/publications/obesity/WHO\\_TRS\\_894/en/](https://www.who.int/nutrition/publications/obesity/WHO_TRS_894/en/)  
27  
28  
29 433 19. WHO. The use of antiretroviral drugs for treating and preventing HIV infection guidelines  
30  
31 434 HIV/AIDS Programme. 2016 [cited 2021 Jan 19].  
32  
33 435 [http://apps.who.int/iris/bitstream/10665/85322/1/WHO\\_HIV\\_2013.7\\_eng.pdf](http://apps.who.int/iris/bitstream/10665/85322/1/WHO_HIV_2013.7_eng.pdf)  
34  
35  
36  
37 436 20. Biressaw S, Abegaz WE, Abebe M, Taye WA, Belay M. Adherence to Antiretroviral  
38  
39 437 Therapy and associated factors among HIV infected children in Ethiopia: Unannounced  
40  
41 438 home-based pill count versus caregivers' report. BMC Pediatrics. 2013;13:132.  
42  
43 439 <https://doi.org/10.1186/1471-2431-13-132> PMID: 24229394  
44  
45  
46  
47 440 21. Haberer JE, Bwana BM, Orrell C, Asiimwe S, Amanyire G, Musinguzi N, et al. ART  
48  
49 441 adherence and viral suppression are high among most non-pregnant individuals with  
50  
51 442 early-stage, asymptomatic HIV infection: an observational study from Uganda and South  
52  
53 443 Africa. Journal of the International AIDS Society. 2019;22(2):e25232.  
54  
55  
56  
57

- 1  
2  
3 444 <https://doi.org/10.1002/jia2.25232> PMID: 30746898  
4  
5  
6 445 22. Kwantwi LB, Tunu BK, Boateng D, Quansah DY. Body Mass Index, Haemoglobin, and  
7  
8 446 Total Lymphocyte Count as a Surrogate for CD4 Count in Resource Limited Settings. *J*  
9  
10  
11 447 *Biomarkers*. 2017; 2017: 7907352.  
12  
13 448 <https://www.ncbi.nlm.nih.gov/pmc/articles/PMC5412137/> PMID: 28484663  
14  
15  
16 449 23. Akinola NO, Olasode O, Adediran IA, Onayemi O, Murainah A, Irinoye O, et al. The  
17  
18 450 search for a predictor of CD4 cell count continues: Total lymphocyte count is not a  
19  
20  
21 451 substitute for CD4 cell count in the management of HIV-infected individuals in a  
22  
23 452 resource-limited setting. *Clinical Infectious Diseases*. 2004;39(4):579–81.  
24  
25 453 <https://doi.org/10.1086/422722> PMID: 15356826  
26  
27  
28 454 24. Koethe JR, Jenkins CA, Lau B, Shepherd BE, Wester W, Rebeiro PF, et al. Higher time-  
29  
30  
31 455 updated body mass index: association with improved CD4+ cell recovery on HIV  
32  
33 456 treatment. *Journal of Acquired Immune Deficiency Syndromes*. 2016;73(2):197-204.  
34  
35 457 <https://dx.doi.org/10.1097%2FQAI.0000000000001035> PMID: 27116044  
36  
37  
38 458 25. Biadgilign S, Reda AA, Digaffe T. Predictors of mortality among HIV infected patients  
39  
40 459 taking antiretroviral treatment in Ethiopia: a retrospective cohort study. *AIDS research*  
41  
42 460 *and therapy*. 2012;9:15. <https://doi.org/10.1186/1742-6405-9-15> PMID: 22606951  
43  
44  
45 461 26. Reda AA, Biadgilign S, Deribew A, Gebre B, Deribe K. Predictors of Change in CD4  
46  
47 462 Lymphocyte Count and Weight among HIV Infected Patients on Anti-Retroviral  
48  
49 463 Treatment in Ethiopia: A Retrospective Longitudinal Study. Ensoli B, editor. *PLoS One*.  
50  
51 464 2013;8(4):e58595. <https://doi.org/10.1371/journal.pone.0058595> PMID: 23573191  
52  
53  
54  
55 465 27. Naidoo K, Yende-Zuma N, Augustine S. A retrospective cohort study of body mass index  
56  
57

- 1  
2  
3 466 and survival in HIV infected patients with and without TB co-infection. *Infectious*  
4  
5 467 *Diseases of Poverty*. 2018;7:35. <https://doi.org/10.1186/s40249-018-0418-3> PMID:  
6  
7 468 29690932  
8  
9  
10  
11 469 28. Van der Sande MA, van der Loeff MF, Aveika AA, Sabally S, Togun T, Sarge-Njie R, et  
12  
13 470 al. Body mass index at time of HIV diagnosis: a strong and independent predictor of  
14  
15 471 survival. *Journal of Acquired Immune Deficiency Syndromes*. 2004;37(2):1288-94.  
16  
17 472 <https://doi.org/10.1097/01.qai.0000122708.59121.03> PMID: 15385737  
18  
19  
20  
21 473 29. Grinspoon S, Mulligan K. Weight loss and wasting in patients infected with Human  
22  
23 474 Immunodeficiency Virus. *Clinical Infectious Diseases*. 2003;36(Supplement\_2):S69-78.  
24  
25 475 <https://doi.org/10.1086/367561> PMID: 12652374  
26  
27  
28 476 30. Mwamburi DM, Wilson IB, Jacobson DL, Spiegelman D, Gorbach SL, Knox TA, et al.  
29  
30 477 Understanding the role of HIV load in determining weight change in the era of highly  
31  
32 478 active antiretroviral therapy. *Clinical Infectious Diseases*. 2005;40(1):167-73.  
33  
34 479 <https://doi.org/10.1086/426591> PMID: 15614708  
35  
36  
37  
38 480 31. Fana GT, Ndhlovu CE. Renal dysfunction among anti-retroviral therapy naïve HIV  
39  
40 481 infected patients in Zimbabwe. *The Central African Journal of Medicine*. 2011;57(1-4):1-  
41  
42 482 5. <https://www.ajol.info/index.php/caj/article/view/73724> PMID: 24968654  
43  
44  
45  
46 483 32. Gupta SK, Smurzynski M, Franceschini N, Bosch RJ, Szczech LA, Kalayjian RC. The  
47  
48 484 effects of HIV-1 viral suppression and non-viral factors on quantitative proteinuria in the  
49  
50 485 HAART era. *Antiviral Therapy*. 2009;14(4): 543–549. PMID: 19578239  
51  
52  
53 486 33. Rednor SJ, Ross MJ. Molecular mechanisms of injury in HIV-associated nephropathy.  
54  
55 487 *Frontiers in Medicine*. 2018;5:177. <https://doi.org/10.3389/fmed.2018.00177> PMID:

1  
2  
3 488 29930940  
4  
5  
6  
7  
8  
9  
10  
11  
12  
13  
14  
15  
16  
17  
18  
19  
20  
21  
22  
23  
24  
25  
26  
27  
28  
29  
30  
31  
32  
33  
34  
35  
36  
37  
38  
39  
40  
41  
42  
43  
44  
45  
46  
47  
48  
49  
50  
51  
52  
53  
54  
55  
56  
57  
58  
59  
60

For peer review only



1  
2  
3  
4  
5  
6  
7  
8  
9  
10  
11  
12  
13  
14  
15  
16  
17  
18  
19  
20  
21  
22  
23  
24  
25  
26  
27  
28  
29  
30  
31  
32  
33  
34  
35  
36  
37  
38  
39  
40  
41  
42  
43  
44  
45  
46  
47  
48  
49  
50  
51  
52  
53  
54  
55  
56  
57  
58  
59  
60

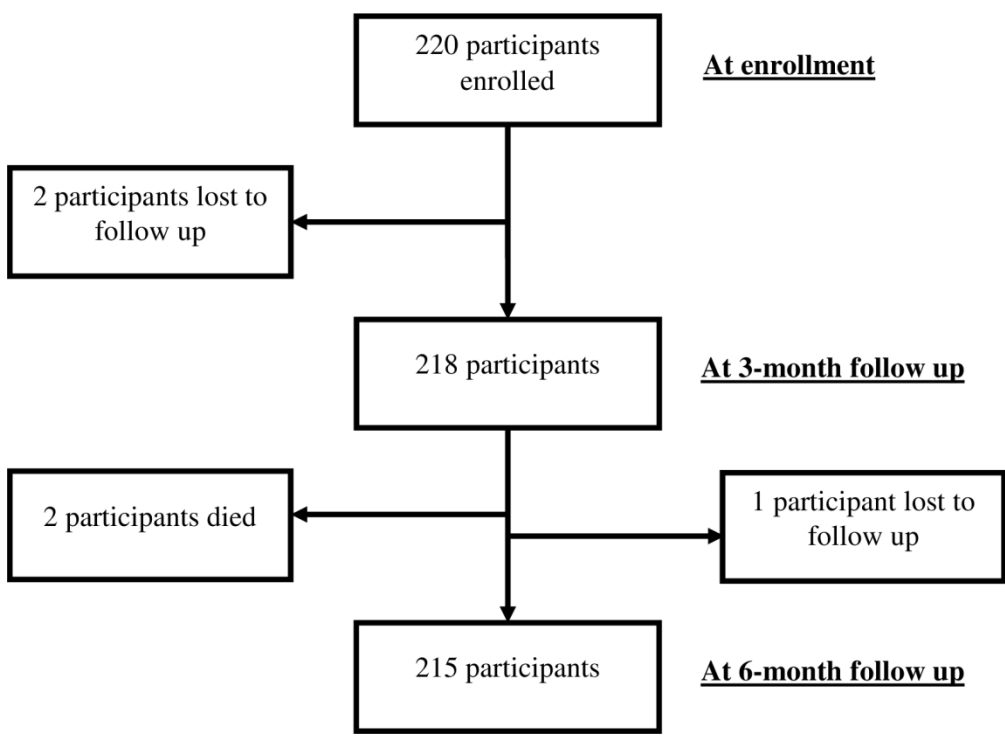

Figure 1. Consort diagram.

146x105mm (300 x 300 DPI)

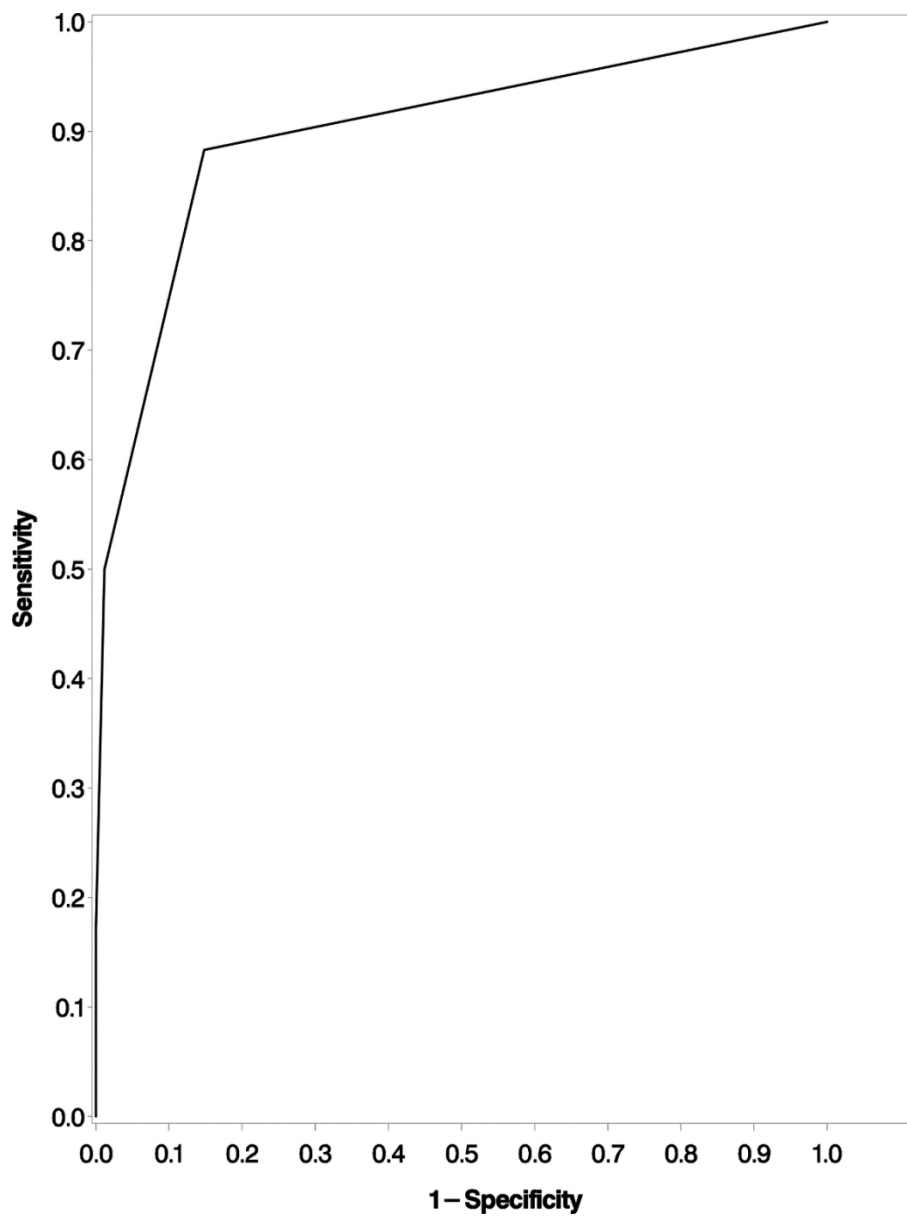

Figure 2. Receiver Operating Characteristic curve assessing a model using BMI decrease, proteinuria, and total lymphocyte counts to predict viral non-suppression among HIV-infected individuals initiated on ART in Dar es Salaam, Tanzania, 2019

137x181mm (220 x 220 DPI)

Supplementary Figure 1. Scatter plots of BMI and CD4 counts

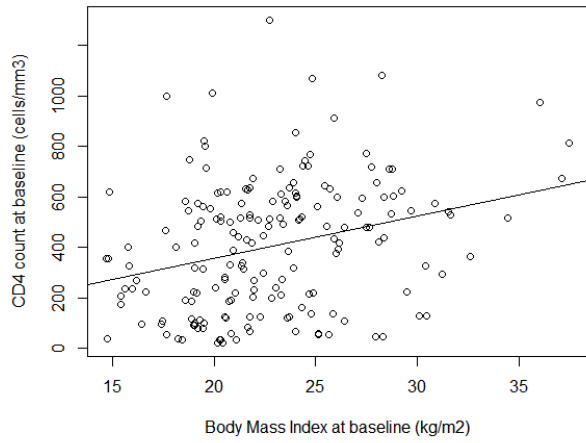

rho 0.287, p <0.0001

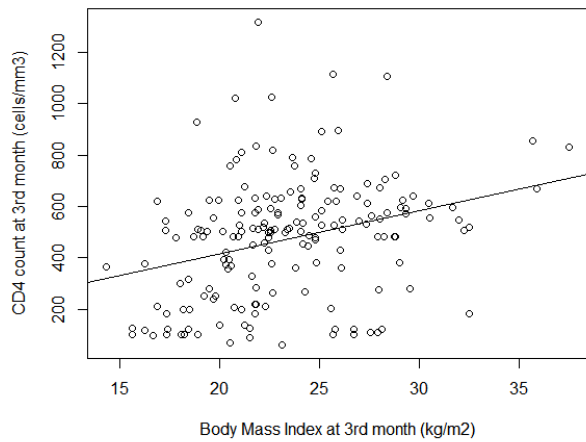

rho 0.305, p <0.0001

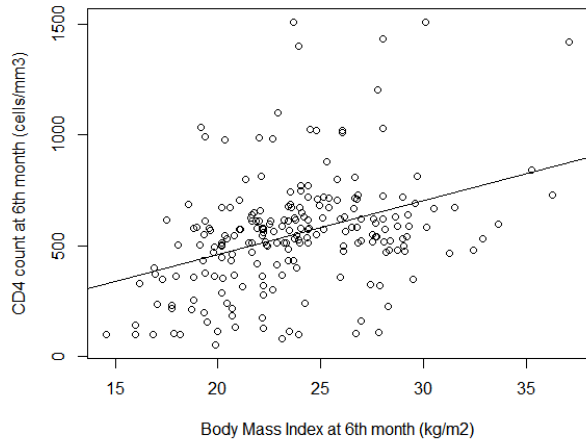

rho 0.373, p <0.0001

Supplementary Figure 2. Scatter plots of total lymphocyte count and CD4 count

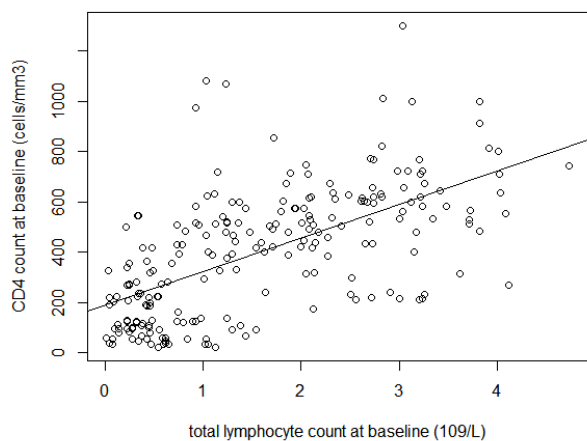

rho 0.613, p <0.0001

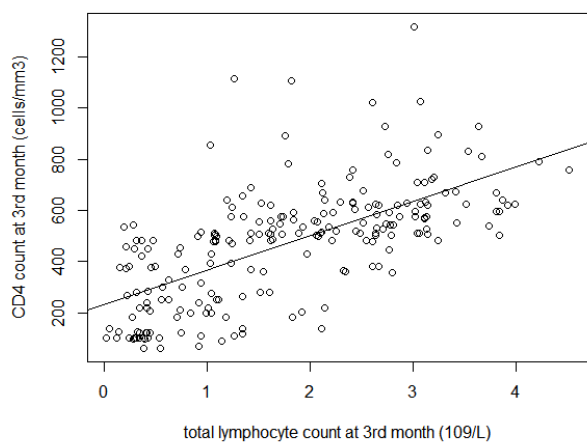

rho 0.650, p <0.0001

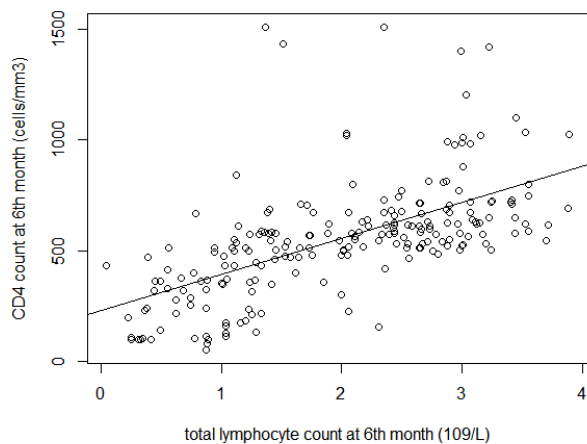

rho 0.602, p <0.0001

Supplementary Figure 3. Scatter plots of urine protein and CD4 count

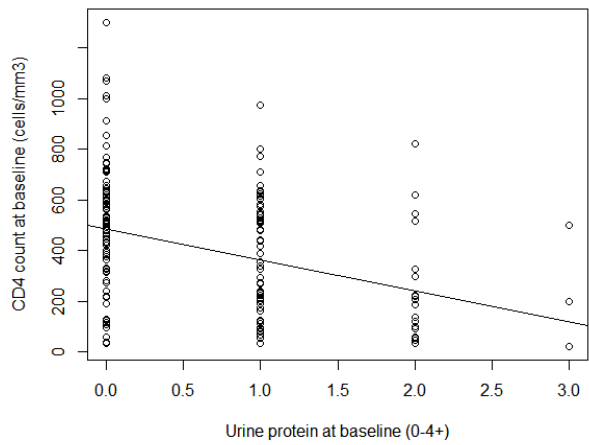

rho -0.364, p <0.0001

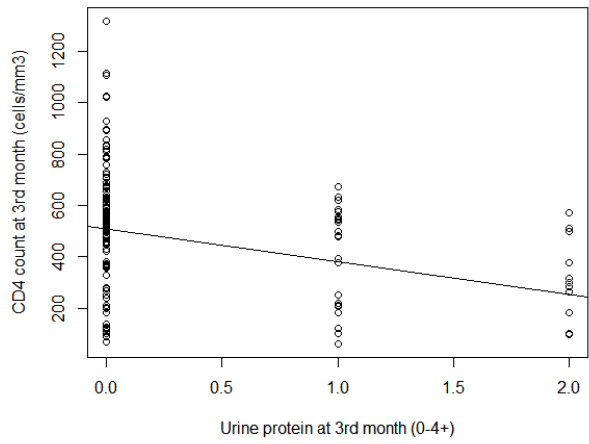

rho -0.334, p <0.0001

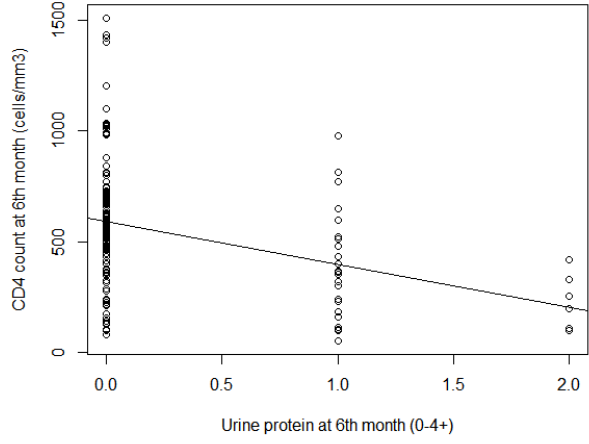

rho -0.372, p <0.0001

# Reporting checklist for cohort study.

Based on the STROBE cohort guidelines.

## Instructions to authors

Complete this checklist by entering the page numbers from your manuscript where readers will find each of the items listed below.

Your article may not currently address all the items on the checklist. Please modify your text to include the missing information. If you are certain that an item does not apply, please write "n/a" and provide a short explanation.

Upload your completed checklist as an extra file when you submit to a journal.

In your methods section, say that you used the STROBE cohort reporting guidelines, and cite them as:

von Elm E, Altman DG, Egger M, Pocock SJ, Gøtzsche PC, Vandenbroucke JP. The Strengthening of Reporting of Observational Studies in Epidemiology (STROBE) Statement: guidelines for reporting observational studies.

|                           |                     |                                                                                    | Page   |
|---------------------------|---------------------|------------------------------------------------------------------------------------|--------|
|                           |                     | Reporting Item                                                                     | Number |
| <b>Title and abstract</b> |                     |                                                                                    |        |
| Title                     | <a href="#">#1a</a> | Indicate the study's design with a commonly used term in the title or the abstract | 1      |
| Abstract                  | <a href="#">#1b</a> | Provide in the abstract an informative and balanced summary                        | 3      |

of what was done and what was found

## Introduction

Background / [#2](#) Explain the scientific background and rationale for the 6  
 rationale investigation being reported

Objectives [#3](#) State specific objectives, including any prespecified 7  
 hypotheses

## Methods

Study design [#4](#) Present key elements of study design early in the paper 8

Setting [#5](#) Describe the setting, locations, and relevant dates, including 8-10  
 periods of recruitment, exposure, follow-up, and data collection

Eligibility criteria [#6a](#) Give the eligibility criteria, and the sources and methods of 8-10  
 selection of participants. Describe methods of follow-up.

Eligibility criteria [#6b](#) For matched studies, give matching criteria and number of -  
 exposed and unexposed

Variables [#7](#) Clearly define all outcomes, exposures, predictors, potential 9,10  
 confounders, and effect modifiers. Give diagnostic criteria, if  
 applicable

Data sources / [#8](#) For each variable of interest give sources of data and details of 8-10  
 measurement methods of assessment (measurement). Describe  
 comparability of assessment methods if there is more than one  
 group. Give information separately for for exposed and  
 unexposed groups if applicable.

|    |                |                      |                                                                   |            |
|----|----------------|----------------------|-------------------------------------------------------------------|------------|
| 1  | Bias           | <a href="#">#9</a>   | Describe any efforts to address potential sources of bias         |            |
| 2  |                |                      |                                                                   |            |
| 3  |                |                      |                                                                   |            |
| 4  | Study size     | <a href="#">#10</a>  | Explain how the study size was arrived at                         | 8          |
| 5  |                |                      |                                                                   |            |
| 6  |                |                      |                                                                   |            |
| 7  | Quantitative   | <a href="#">#11</a>  | Explain how quantitative variables were handled in the            | 9-11       |
| 8  | variables      |                      | analyses. If applicable, describe which groupings were chosen,    |            |
| 9  |                |                      | and why                                                           |            |
| 10 |                |                      |                                                                   |            |
| 11 |                |                      |                                                                   |            |
| 12 |                |                      |                                                                   |            |
| 13 |                |                      |                                                                   |            |
| 14 |                |                      |                                                                   |            |
| 15 | Statistical    | <a href="#">#12a</a> | Describe all statistical methods, including those used to control |            |
| 16 | methods        |                      | for confounding                                                   |            |
| 17 |                |                      |                                                                   |            |
| 18 |                |                      |                                                                   |            |
| 19 |                |                      |                                                                   |            |
| 20 | 10,11          |                      |                                                                   |            |
| 21 |                |                      |                                                                   |            |
| 22 |                |                      |                                                                   |            |
| 23 | Statistical    | <a href="#">#12b</a> | Describe any methods used to examine subgroups and                | 10, 11     |
| 24 | methods        |                      | interactions                                                      |            |
| 25 |                |                      |                                                                   |            |
| 26 |                |                      |                                                                   |            |
| 27 |                |                      |                                                                   |            |
| 28 |                |                      |                                                                   |            |
| 29 | Statistical    | <a href="#">#12c</a> | Explain how missing data were addressed                           | 12         |
| 30 | methods        |                      |                                                                   |            |
| 31 |                |                      |                                                                   |            |
| 32 |                |                      |                                                                   |            |
| 33 |                |                      |                                                                   |            |
| 34 | Statistical    | <a href="#">#12d</a> | If applicable, explain how loss to follow-up was addressed        | -          |
| 35 | methods        |                      |                                                                   |            |
| 36 |                |                      |                                                                   |            |
| 37 |                |                      |                                                                   |            |
| 38 |                |                      |                                                                   |            |
| 39 | Statistical    | <a href="#">#12e</a> | Describe any sensitivity analyses                                 |            |
| 40 | methods        |                      |                                                                   |            |
| 41 |                |                      |                                                                   |            |
| 42 |                |                      |                                                                   |            |
| 43 |                |                      |                                                                   |            |
| 44 |                |                      |                                                                   |            |
| 45 | 11             |                      |                                                                   |            |
| 46 |                |                      |                                                                   |            |
| 47 |                |                      |                                                                   |            |
| 48 | <b>Results</b> |                      |                                                                   |            |
| 49 |                |                      |                                                                   |            |
| 50 |                |                      |                                                                   |            |
| 51 | Participants   | <a href="#">#13a</a> | Report numbers of individuals at each stage of study—eg           | 12         |
| 52 |                |                      | numbers potentially eligible, examined for eligibility, confirmed | (figure 1) |
| 53 |                |                      | eligible, included in the study, completing follow-up, and        |            |
| 54 |                |                      | analysed. Give information separately for for exposed and         |            |
| 55 |                |                      |                                                                   |            |
| 56 |                |                      |                                                                   |            |
| 57 |                |                      |                                                                   |            |
| 58 |                |                      |                                                                   |            |
| 59 |                |                      |                                                                   |            |
| 60 |                |                      |                                                                   |            |



unexposed groups if applicable.

|    |                  |                      |                                                               |
|----|------------------|----------------------|---------------------------------------------------------------|
| 1  |                  |                      |                                                               |
| 2  |                  |                      |                                                               |
| 3  |                  |                      |                                                               |
| 4  | Participants     | <a href="#">#13b</a> | Give reasons for non-participation at each stage              |
| 5  |                  |                      |                                                               |
| 6  |                  |                      | 12                                                            |
| 7  |                  |                      | (figure 1)                                                    |
| 8  |                  |                      |                                                               |
| 9  | Participants     | <a href="#">#13c</a> | Consider use of a flow diagram                                |
| 10 |                  |                      |                                                               |
| 11 |                  |                      |                                                               |
| 12 | 12 (figure 1)    |                      |                                                               |
| 13 |                  |                      |                                                               |
| 14 |                  |                      |                                                               |
| 15 | Descriptive data | <a href="#">#14a</a> | Give characteristics of study participants (eg demographic,   |
| 16 |                  |                      | clinical, social) and information on exposures and potential  |
| 17 |                  |                      | confounders. Give information separately for exposed and      |
| 18 |                  |                      | unexposed groups if applicable.                               |
| 19 |                  |                      |                                                               |
| 20 |                  |                      |                                                               |
| 21 |                  |                      |                                                               |
| 22 |                  |                      |                                                               |
| 23 |                  |                      |                                                               |
| 24 |                  |                      |                                                               |
| 25 | Descriptive data | <a href="#">#14b</a> | Indicate number of participants with missing data for each    |
| 26 |                  |                      | variable of interest                                          |
| 27 |                  |                      |                                                               |
| 28 |                  |                      |                                                               |
| 29 |                  |                      |                                                               |
| 30 | See 12           |                      |                                                               |
| 31 |                  |                      |                                                               |
| 32 |                  |                      |                                                               |
| 33 | Descriptive data | <a href="#">#14c</a> | Summarise follow-up time (eg, average and total amount)       |
| 34 |                  |                      |                                                               |
| 35 |                  |                      |                                                               |
| 36 | 12               |                      |                                                               |
| 37 |                  |                      |                                                               |
| 38 |                  |                      |                                                               |
| 39 |                  |                      |                                                               |
| 40 | Outcome data     | <a href="#">#15</a>  | Report numbers of outcome events or summary measures          |
| 41 |                  |                      | over time. Give information separately for exposed and        |
| 42 |                  |                      | unexposed groups if applicable.                               |
| 43 |                  |                      |                                                               |
| 44 |                  |                      |                                                               |
| 45 |                  |                      |                                                               |
| 46 |                  |                      |                                                               |
| 47 | 14               |                      |                                                               |
| 48 |                  |                      |                                                               |
| 49 |                  |                      |                                                               |
| 50 | Main results     | <a href="#">#16a</a> | Give unadjusted estimates and, if applicable, confounder-     |
| 51 |                  |                      | adjusted estimates and their precision (eg, 95% confidence    |
| 52 |                  |                      | interval). Make clear which confounders were adjusted for and |
| 53 |                  |                      | why they were included                                        |
| 54 |                  |                      |                                                               |
| 55 |                  |                      |                                                               |
| 56 |                  |                      |                                                               |
| 57 |                  |                      |                                                               |
| 58 |                  |                      |                                                               |
| 59 |                  |                      |                                                               |
| 60 |                  |                      |                                                               |

|    |                          |                      |                                                                      |       |
|----|--------------------------|----------------------|----------------------------------------------------------------------|-------|
| 1  | Main results             | <a href="#">#16b</a> | Report category boundaries when continuous variables were            | 12-15 |
| 2  |                          |                      | categorized                                                          |       |
| 3  |                          |                      |                                                                      |       |
| 4  |                          |                      |                                                                      |       |
| 5  |                          |                      |                                                                      |       |
| 6  | Main results             | <a href="#">#16c</a> | If relevant, consider translating estimates of relative risk into    |       |
| 7  |                          |                      | absolute risk for a meaningful time period                           |       |
| 8  |                          |                      |                                                                      |       |
| 9  |                          |                      |                                                                      |       |
| 10 |                          |                      |                                                                      |       |
| 11 |                          |                      |                                                                      |       |
| 12 | -                        |                      |                                                                      |       |
| 13 |                          |                      |                                                                      |       |
| 14 |                          |                      |                                                                      |       |
| 15 | Other analyses           | <a href="#">#17</a>  | Report other analyses done—eg analyses of subgroups and              | 16    |
| 16 |                          |                      | interactions, and sensitivity analyses                               |       |
| 17 |                          |                      |                                                                      |       |
| 18 |                          |                      |                                                                      |       |
| 19 |                          |                      |                                                                      |       |
| 20 | <b>Discussion</b>        |                      |                                                                      |       |
| 21 |                          |                      |                                                                      |       |
| 22 |                          |                      |                                                                      |       |
| 23 | Key results              | <a href="#">#18</a>  | Summarise key results with reference to study objectives             | 20    |
| 24 |                          |                      |                                                                      |       |
| 25 |                          |                      |                                                                      |       |
| 26 | Limitations              | <a href="#">#19</a>  | Discuss limitations of the study, taking into account sources of     | 5     |
| 27 |                          |                      | potential bias or imprecision. Discuss both direction and            |       |
| 28 |                          |                      | magnitude of any potential bias.                                     |       |
| 29 |                          |                      |                                                                      |       |
| 30 |                          |                      |                                                                      |       |
| 31 |                          |                      |                                                                      |       |
| 32 |                          |                      |                                                                      |       |
| 33 |                          |                      |                                                                      |       |
| 34 | Interpretation           | <a href="#">#20</a>  | Give a cautious overall interpretation considering objectives,       | 18-20 |
| 35 |                          |                      | limitations, multiplicity of analyses, results from similar studies, |       |
| 36 |                          |                      | and other relevant evidence.                                         |       |
| 37 |                          |                      |                                                                      |       |
| 38 |                          |                      |                                                                      |       |
| 39 |                          |                      |                                                                      |       |
| 40 |                          |                      |                                                                      |       |
| 41 |                          |                      |                                                                      |       |
| 42 | Generalisability         | <a href="#">#21</a>  | Discuss the generalisability (external validity) of the study        | 20    |
| 43 |                          |                      | results                                                              |       |
| 44 |                          |                      |                                                                      |       |
| 45 |                          |                      |                                                                      |       |
| 46 |                          |                      |                                                                      |       |
| 47 | <b>Other Information</b> |                      |                                                                      |       |
| 48 |                          |                      |                                                                      |       |
| 49 |                          |                      |                                                                      |       |
| 50 | Funding                  | <a href="#">#22</a>  | Give the source of funding and the role of the funders for the       | 22    |
| 51 |                          |                      | present study and, if applicable, for the original study on which    |       |
| 52 |                          |                      | the present article is based                                         |       |
| 53 |                          |                      |                                                                      |       |
| 54 |                          |                      |                                                                      |       |
| 55 |                          |                      |                                                                      |       |
| 56 |                          |                      |                                                                      |       |
| 57 |                          |                      |                                                                      |       |
| 58 |                          |                      |                                                                      |       |
| 59 |                          |                      |                                                                      |       |
| 60 |                          |                      |                                                                      |       |

1 None The STROBE checklist is distributed under the terms of the Creative Commons Attribution  
2 License CC-BY. This checklist can be completed online using <https://www.goodreports.org/>, a tool  
3 made by the [EQUATOR Network](#) in collaboration with [Penelope.ai](#)  
4  
5  
6  
7  
8  
9  
10  
11  
12  
13  
14  
15  
16  
17  
18  
19  
20  
21  
22  
23  
24  
25  
26  
27  
28  
29  
30  
31  
32  
33  
34  
35  
36  
37  
38  
39  
40  
41  
42  
43  
44  
45  
46  
47  
48  
49  
50  
51  
52  
53  
54  
55  
56  
57  
58  
59  
60

# BMJ Open

**Body mass index, proteinuria and total lymphocyte counts in predicting treatment responses among ART naïve individuals with HIV initiated on antiretroviral treatment in Dar es Salaam, Tanzania, 2019: a cohort study**

|                                 |                                                                                                                                                                                                                                                                                                                                                                                         |
|---------------------------------|-----------------------------------------------------------------------------------------------------------------------------------------------------------------------------------------------------------------------------------------------------------------------------------------------------------------------------------------------------------------------------------------|
| Journal:                        | <i>BMJ Open</i>                                                                                                                                                                                                                                                                                                                                                                         |
| Manuscript ID                   | bmjopen-2021-059193.R1                                                                                                                                                                                                                                                                                                                                                                  |
| Article Type:                   | Original research                                                                                                                                                                                                                                                                                                                                                                       |
| Date Submitted by the Author:   | 02-Apr-2022                                                                                                                                                                                                                                                                                                                                                                             |
| Complete List of Authors:       | Munseri, Patricia; Muhimbili University of Health and Allied Sciences School of Medicine,<br>Jassely, Lazaro; Muhimbili University of Health and Allied Sciences School of Medicine, Internal Medicine<br>Tumaini, Basil; Muhimbili University of Health and Allied Sciences, Internal Medicine<br>Hertzmark, Ellen; Harvard University T H Chan School of Public Health, Global Health |
| <b>Primary Subject Heading</b>: | HIV/AIDS                                                                                                                                                                                                                                                                                                                                                                                |
| Secondary Subject Heading:      | HIV/AIDS                                                                                                                                                                                                                                                                                                                                                                                |
| Keywords:                       | INTERNAL MEDICINE, INFECTIOUS DISEASES, HIV & AIDS < INFECTIOUS DISEASES                                                                                                                                                                                                                                                                                                                |
|                                 |                                                                                                                                                                                                                                                                                                                                                                                         |

SCHOLARONE™  
Manuscripts



I, the Submitting Author has the right to grant and does grant on behalf of all authors of the Work (as defined in the below author licence), an exclusive licence and/or a non-exclusive licence for contributions from authors who are: i) UK Crown employees; ii) where BMJ has agreed a CC-BY licence shall apply, and/or iii) in accordance with the terms applicable for US Federal Government officers or employees acting as part of their official duties; on a worldwide, perpetual, irrevocable, royalty-free basis to BMJ Publishing Group Ltd ("BMJ") its licensees and where the relevant Journal is co-owned by BMJ to the co-owners of the Journal, to publish the Work in this journal and any other BMJ products and to exploit all rights, as set out in our [licence](#).

The Submitting Author accepts and understands that any supply made under these terms is made by BMJ to the Submitting Author unless you are acting as an employee on behalf of your employer or a postgraduate student of an affiliated institution which is paying any applicable article publishing charge ("APC") for Open Access articles. Where the Submitting Author wishes to make the Work available on an Open Access basis (and intends to pay the relevant APC), the terms of reuse of such Open Access shall be governed by a Creative Commons licence – details of these licences and which [Creative Commons](#) licence will apply to this Work are set out in our licence referred to above.

Other than as permitted in any relevant BMJ Author's Self Archiving Policies, I confirm this Work has not been accepted for publication elsewhere, is not being considered for publication elsewhere and does not duplicate material already published. I confirm all authors consent to publication of this Work and authorise the granting of this licence.

1  
2  
3 **1 Body mass index, proteinuria and total lymphocyte counts in predicting treatment**  
4  
5 **2 responses among ART naïve individuals with HIV initiated on antiretroviral treatment in**  
6  
7 **3 Dar es Salaam, Tanzania, 2019: a cohort study**  
8  
9  
10  
11  
12  
13

14 5 Patricia Munseri<sup>1\*</sup>§, Lazaro Jassely<sup>1\*</sup>, Basil Tumaini<sup>1</sup>, Ellen Hertzmark<sup>2</sup>  
15  
16  
17 6

18  
19  
20 7 <sup>1</sup> Department of Internal Medicine, Muhimbili University of Health and Allied Sciences, Dar es  
21  
22 8 Salaam, Tanzania

23  
24  
25 9 <sup>2</sup> Department of Global Health and Population, Harvard University T H Chan School of Public  
26  
27 10 Health, Boston, MA  
28  
29

30  
31  
32  
33 12 § Corresponding author  
34  
35

36 13 Email: [patricia.munseri@gmail.com](mailto:patricia.munseri@gmail.com) (PM)  
37  
38  
39 14

40  
41  
42 15 \*Shared first Author  
43  
44  
45 16

46  
47  
48 17 Word count abstract: 294  
49  
50

51 18 Word count manuscript: 3563  
52  
53  
54  
55  
56  
57

1  
2  
3  
4  
5  
6  
7  
8  
9  
10  
11  
12  
13  
14  
15  
16  
17  
18  
19  
20  
21  
22  
23  
24  
25  
26  
27  
28  
29  
30  
31  
32  
33  
34  
35  
36  
37  
38  
39  
40  
41  
42  
43  
44  
45  
46  
47  
48  
49  
50  
51  
52  
53  
54  
55  
56  
57  
58  
59  
60

19 **Keywords:** monitoring ART treatment; HIV/AIDS; CD4 count; BMI in HIV; proteinuria in  
20 HIV; viral suppression

For peer review only

1  
2  
3 22 **Abstract**  
4  
5

6 23 **Objectives:** To explore the potential use of body mass index, proteinuria, and total lymphocyte  
7  
8 24 count changes in predicting immunological and virological response in individuals with HIV  
9  
10 25 initiated on antiretroviral therapy (ART).  
11  
12

13  
14 26 **Design:** Prospective cohort study.  
15

16  
17 27 **Setting:** Three urban HIV care and treatment centres (CTC) in Dar es Salaam.  
18

19  
20 28 **Participants:** Individuals with HIV initiating ART.  
21

22  
23 29 **Outcome measures:** HIV viral load  $\geq 1000$  copies/ml (viral non-suppression) at six months after  
24  
25 30 ART initiation.  
26

27  
28 31 **Results:** Of 215 (out of 220 enrolled) participants who returned for evaluation at six months, 147  
29  
30 32 (66.8%) were female. At six months of follow-up, 89.4% (76/85) of participants with sustained  
31  
32 33 weight gain were virally suppressed compared to 31.8% (7/22) with sustained loss,  $p < 0.001$ . In  
33  
34 34 participants who were lymphopaenic at baseline, an increase to normal total lymphocyte counts at  
35  
36 35 six months was associated with an increase in CD4 count compared to participants who remained  
37  
38 36 lymphopaenic, 96.2% (50/52) vs. 54.8% (17/31),  $p < 0.001$ . At baseline, 50.0% (110/220) had  
39  
40 37 proteinuria. In participants without proteinuria from baseline to six months, 89.8% (79/88) were  
41  
42 38 virally suppressed compared to participants with proteinuria at baseline and/or three months,  
43  
44 39 85.6% (77/90), those with persistent proteinuria, 30.8% (8/26), and proteinuria at six months only,  
45  
46 40 45.5% (5/11),  $p < 0.001$ . In modified Poisson regression, the independent predictors other than CD4  
47  
48 41 cell counts for viral non-suppression at six months among individuals with HIV initiating on ART  
49  
50 42 were BMI loss  $> 5\%$  from baseline to six months, {adjusted RR 2.73, 95% CI (1.36-5.47)},  
51  
52  
53  
54  
55  
56  
57



1  
2  
3 43 lymphopaenia at six months, {adjusted RR = 4.54, 95% CI (2.19-9.39)}, and proteinuria at six  
4  
5 44 months {adjusted RR = 2.63, 95% CI (1.25-5.54)}.

6  
7  
8 45 **Conclusions:** Change in body mass index, total lymphocyte count, and presence of proteinuria can  
9  
10 46 monitor and predict ART response and may be particularly helpful in settings when CD4 counts  
11  
12  
13 47 and viral load monitoring are unavailable.

14  
15  
16 48

17  
18  
19  
20  
21  
22  
23  
24  
25  
26  
27  
28  
29  
30  
31  
32  
33  
34  
35  
36  
37  
38  
39  
40  
41  
42  
43  
44  
45  
46  
47  
48  
49  
50  
51  
52  
53  
54  
55  
56  
57

For peer review only

1  
2  
3 **49 Article Summary**  
4  
5

6 **50 Strengths and limitations of this study**  
7

- 8  
9 **51** ➤ We had complete data on 98% of the originally enrolled participants.  
10  
11 **52** ➤ In resource-constrained situations, when viral load and CD4 testing are not always easily  
12  
13 available, models such as ours with locally determined easily computable prediction cut-offs  
14 **53**  
15  
16 can be utilized by clinicians to make clinical decisions.  
17 **54**  
18 **55** ➤ Our findings require validation in a study with larger sample size.  
19  
20 **56** ➤ Local conditions and treatment standards may influence some of the patterns we observed,  
21  
22 both in prevalence and in effect.  
23 **57**  
24  
25  
26 **58**  
27  
28  
29  
30  
31  
32  
33  
34  
35  
36  
37  
38  
39  
40  
41  
42  
43  
44  
45  
46  
47  
48  
49  
50  
51  
52  
53  
54  
55  
56  
57  
58

## Introduction

In 2019 about 38 million people were living with HIV globally, with 1.7 million in Tanzania accounting for an estimated prevalence of 4.8% in the Tanzanian population aged 15-49 years [1]. Viral load testing is the recommended method for monitoring HIV treatment response [2]. However, viral load testing in resource-constrained settings is challenged by limited access, high costs, unavailability at district levels, and in areas where available, sometimes a shortage of reagents, compounded by challenges with equipment maintenance [3], as happened during the COVID-19 pandemic.

There is no doubt that viral load testing is effective in monitoring patient treatment adherence and HIV resistance, as per WHO guidelines. However, in resource-constrained areas that may not always be able to perform viral load testing in a timely manner, there is a need for readily available and routinely assessed objective measures that may predict early viral non-suppression or measures that may help with interim evaluation of patients suspected to have treatment failure who will thereafter need additional follow up with viral load testing. Individuals with HIV are routinely assessed for weight, height, renal function, and complete blood counts before initiation of combined antiretroviral treatment (ART) in resource constrained settings including Tanzania. These assessments are repeated at intervals of three months, six months and biannually after ART initiation. Adverse changes in such parameters from treatment initiation (baseline) or subsequently at follow-up visits provides useful information about treatment responses and may identify a targeted group of patients to be prioritized for viral load testing before a decision to switch the ART regimen.

Routine parameters such as body mass index, total lymphocyte counts, and protein in urine are easily available and can be evaluated in combination for HIV treatment monitoring. Weight loss

1  
2  
3 82 is one of the major manifestations of advanced HIV infection. Factors hypothesized to contribute  
4  
5 83 to weight loss include metabolic alterations, anorexia, malabsorptive disorders, hypogonadism,  
6  
7  
8 84 and excessive cytokine production [4]  
9

10  
11 85 Weight gain following ART initiation may reflect slowed resting energy expenditure resulting  
12  
13 86 from viral suppression and a decrease in HIV enteropathy [5]. Weight gain, especially among  
14  
15 87 individuals with low BMI, is associated with improved survival and decreased risk of clinical  
16  
17 88 failure [6]. ART responses depend on adherence [7], nutritional status at baseline [8], HIV subtype  
18  
19 89 [9], and ART combination regimen [10]. In Port Harcourt, Nigeria, among 318 participants with  
20  
21 90 HIV infection aged  $\geq 18$  years initiated on ART, almost 70% and 55% of participants gained at  
22  
23 91 least 1 kg weight in the first six months and one year of treatment, respectively [11]. Previous  
24  
25 92 studies in Tanzania have shown that a decrease in nutrition status within the first three months of  
26  
27 93 ART initiation was associated with mortality [12].  
28  
29  
30  
31

32 94 HIV-associated nephropathy (HIVAN) is the most common renal biopsy finding in individuals  
33  
34 95 with HIV with a prevalence ranging from 4.7 to 38% [13]. Proteinuria and elevated creatinine have  
35  
36 96 been associated with AIDS-defining illness and death [14]. Urine assessment for protein by  
37  
38 97 dipstick can detect renal disease and progression, especially as renal biopsy, an invasive procedure,  
39  
40 98 is not readily available in most resource-constrained settings.  
41  
42  
43

44 99 HIV is associated with progressive destruction of CD4+ T-helper lymphocytes responsible for the  
45  
46 100 profound immunodeficiency that underlies AIDS [15]. As CD4 cells are a subset of lymphocytes,  
47  
48 101 any significant change in CD4 cells will cause a parallel change in total lymphocyte counts [16].  
49  
50  
51  
52  
53  
54  
55  
56  
57

1  
2  
3  
4  
5  
6  
7  
8  
9  
10  
11  
12  
13  
14  
15  
16  
17  
18  
19  
20  
21  
22  
23  
24  
25  
26  
27  
28  
29  
30  
31  
32  
33  
34  
35  
36  
37  
38  
39  
40  
41  
42  
43  
44  
45  
46  
47  
48  
49  
50  
51  
52  
53  
54  
55  
56  
57  
58  
59  
60

102 This study aimed at assessing the following routinely accessible parameters: body mass index,  
103 proteinuria, and total lymphocyte counts (TLC), and their patterns of change in monitoring HIV  
104 treatment responses at six months following ART initiation.

For peer review only

## 105 **Methods**

### 106 **Study design and population**

107 This cohort study was conducted in three urban care and treatment centres (CTC) in Temeke  
108 district, Dar es Salaam: Temeke regional referral hospital, Mbagala Rangi-tatu district hospital,  
109 and Mbagala Kizuiani dispensary between September 2018 and April 2019. The centres were  
110 chosen due to large numbers of ART naïve clients, amounting to 60 or more per clinic per month.  
111 The sites have an organized CTC and follow up plan for clients. Participants were included in the  
112 study if they were newly diagnosed with HIV and were ART naïve aged 18 years or older and  
113 were able to provide written informed consent. Participants were initiated on ART based on the  
114 Tanzanian National guidelines [17] with a default regimen of tenofovir, lamivudine and efavirenz  
115 unless contraindicated.

### 116 **Sample size estimation**

117 To determine the minimal detectable relative risks for the study variables, we considered two-  
118 sample tests of the expected highest risk category versus the expected lowest risk category. For  
119 the dichotomous potential risk factors, we assumed a total number of 215 subjects, split roughly  
120 as our actual data are split (with numbers rounded to the nearest 5 to mimic a pre-study power  
121 calculation). For BMI change we used 80 for the reference group (gain), 125 for stable, and 20 for  
122 the loss group. The minimum detectable risk ratios were 3.77 for decreased BMI, 2.56 for stable  
123 BMI, 2.94 for lymphopenia and for proteinuria, 2.47 for stage greater than 1, 2.47 for age of 40,  
124 years and above 2.59 (or  $< 0.11$ ) for female sex, 2.74 for secondary or higher education, 2.44 for  
125 unemployment and for never married.

126

## 127 **Data collection**

128 We used an interviewer-based structured tool to conduct face-to-face interviews to obtain socio-  
129 demographic and baseline characteristics (at treatment initiation) such as age, sex, occupation, the  
130 highest level of education attained, marital status, and clinically assessed the participant's WHO  
131 HIV clinical stage. A participant's baseline weight was measured using a SECA weighing scale  
132 recording to the nearest 0.5 kg and height using a wall stadiometer recording to the nearest 0.5 cm.  
133 Body mass index was then computed by dividing the weight in kg by the height in meters squared,  
134 the interpretation of which was adapted from WHO [18].

135 About 10ml of venous blood was collected aseptically from each participant; 5ml for CD4 cell  
136 counts, analysed using BD FACSCount™ (Becton Dickenson, USA) and 5ml for complete blood  
137 count to obtain the total lymphocyte counts, analysed by an auto-analyser (Cell DNY1800 from  
138 Abbott Diagnostics Division, USA). TLC was categorized as lymphopaenia ( $<1 \times 10^9/L$ ), normal  
139 lymphocyte ( $1 \times 10^9/L$  to  $4 \times 10^9/L$ ), and lymphocytosis ( $>4.0 \times 10^9/L$ ). We assessed for proteinuria  
140 by collecting about 15ml of a fresh urine sample from each participant into an empty, clean, dry  
141 container and tested using CYBOW™ strips (DFI Co. Ltd, Korea). Proteinuria was categorized as  
142 negative proteinuria (no proteinuria), trace or 1+ proteinuria (equivalent to 30 to 100 mg/dl), 2+  
143 proteinuria (equivalent to 100 to 300 mg/dl), 3+ proteinuria (equivalent to 300 to 1000 mg/dl), and  
144 4+ proteinuria (equivalent to greater than 1000 mg/dl).

145 At three and six months after ART initiation, a repeat assessment of participants was done for CD4  
146 cell counts, TLC, proteinuria, and weight. At six months, an additional 5ml of blood was collected  
147 from each study participant for viral load measurement using the Abbott RealTime HIV-1 assay.  
148 Participants were classified as virally suppressed at six months after ART initiation if their HIV  
149 viral load was  $<1000$  copies/ml, according to Tanzania HIV treatment guidelines. Levels and

150 changes in BMI, lymphocytes, and proteinuria were compared between participants who were HIV  
151 suppressed and that of HIV not suppressed.

152 BMI was considered to have changed between one time point and another if it increased or  
153 decreased by over 5%. BMI changes from ART initiation to six months were categorized into three  
154 groups as (i) loss of more than 5%, (ii) stable (change between -5% and 5%, or (iii) gain of more  
155 than 5%. The TLC were categorized as (i) lymphopaenia  $< 1 \times 10^9$  cells/L, (ii) normal lymphocyte  
156 count  $1-4 \times 10^9$  cells/L (iii) Lymphocytosis  $> 4 \times 10^9$  cells/L. The TLC pattern change was  
157 categorized as (i) lymphopaenic at 6 months, regardless of the status at baseline or three months;  
158 (ii) increased from lymphopaenic to normal or higher; (iii) stayed normal or higher (no  
159 lymphopaenia seen). Urinary protein patterns were categorized as (i) proteinuria at six months  
160 regardless of baseline proteinuria status; (ii) proteinuria at baseline and/or third month but not six  
161 months; and (iii) no proteinuria seen.

### 162 **Patient and public involvement**

163 Patients or members of the public were not involved in the design, or conduct, or reporting, or  
164 dissemination plans of the research.

### 165 **Statistical methods**

166 Data were analysed using IBM® SPSS® Statistics version 26, R, and SAS version 9.4 (Cary, NC).  
167 Categorical variables such as age group, sex, marital status, level of education, occupation,  
168 categories of BMI, CD4 count, proteinuria, TLC, BMI change, TLC change, and proteinuria  
169 change were summarized as frequencies and proportions. Continuous variables such as age, BMI,  
170 and CD4 count were summarized as means and standard deviations. When necessary, small groups



1  
2  
3 171 were combined for analysis. To determine the association between BMI, TLC or urine protein to  
4  
5 172 CD4 count, we used correlation.  
6  
7

8 173 To determine the relationships between individual predictors and viral non-suppression at six  
9  
10 174 months, we first used modified Poisson regression for univariable analysis with an assumption that  
11  
12 175 viral non suppression is a non-rare outcome (more than 10%), to determine which variables to  
13  
14 176 include in the multivariable model [19,20]. For multivariable prediction, all predictors in the  
15  
16 177 univariable model with a p-value of <0.2 and age, a known confounder, were entered into the  
17  
18 178 modified Poisson regression model. The results of the Poisson regression model were presented  
19  
20 179 as relative risk (RR) and 95% confidence interval (RR; 95% CI). To determine the test  
21  
22 180 characteristics (sensitivity, specificity, positive predictive value (PPV), negative predictive value  
23  
24 181 (NPV)) of a score based on the multivariable model, we used two cut-off levels, based on the first  
25  
26 182 quartile and median of the score among the non-suppressed. The score was the sum of the rounded  
27  
28 183 coefficients for the variables for which the confidence intervals did not include 1 in a model  
29  
30 184 containing only these variables. Since these all rounded to 1, this is equivalent to simply counting  
31  
32 185 the number of these characteristics.  
33  
34  
35  
36  
37  
38

39 186 Based on practices in low resourced clinics, communication with the patient and the decision to  
40  
41 187 change the ART regimen depends on the patient's virological status at six months. CD4 cell counts  
42  
43 188 depend on a blood sample collected at the six-month visit and are therefore unavailable for  
44  
45 189 immediate decision making. We, therefore, excluded all CD4 variables from the model and used  
46  
47 190 parameters available at the time of the six-month visit to predict viral non-suppression.  
48  
49  
50  
51  
52  
53  
54  
55  
56  
57

191

## Results

192 During the recruitment, 220 ART naïve individuals with HIV were initiated on ART and all were  
 193 enrolled in the study over a month; each participant was followed up for six months. Two  
 194 participants were lost to follow up at three months; two died before six months of follow up, and  
 195 one participant, a long-distance truck driver, was out of the country at the time of the 6-month  
 196 follow up. Therefore, our analysis data set includes the remaining 215 participants. Details of  
 197 enrolment are shown in Fig 1.

198

199

200 **Figure 1. Consort diagram.**

201

202

### 203 Baseline characteristics of study participants

204 Of the 215 participants analysed, the mean age (SD) was  $37.1 \pm 11.5$  years, 146 (68%) were female,  
 205 113 (53%) were never married, 45 (21%) had secondary education or higher, and 117 (54%) were  
 206 unemployed (Table 1). Most participants, 59.5%, had normal BMI, while 27% were overweight,  
 207 and 13% were underweight. Most participants, 113 (62%), were in WHO HIV clinical stage I, and  
 208 only eight (4%) were in stage IV, though 93 (43%) had CD4 counts of 350 cells/ml or below; 83  
 209 (39%) were lymphopaenic, and 111 (52%) had proteinuria at baseline.

210

211 **Table 1. Characteristics of 215 study participants at ART initiation, Dar es Salaam,**  
 212 **Tanzania, 2019.**

| Characteristic | n (%) | Mean $\pm$ SD   |
|----------------|-------|-----------------|
| Age (years)    |       | $37.1 \pm 11.5$ |

|    |                                                   |              |            |
|----|---------------------------------------------------|--------------|------------|
| 1  |                                                   |              |            |
| 2  |                                                   |              |            |
| 3  | <b>Age group (years)</b>                          |              |            |
| 4  | 18 – 30                                           | 69 (32.1%)   |            |
| 5  | 31 – 40                                           | 72 (33.5%)   |            |
| 6  | 41 – 50                                           | 45 (20.9%)   |            |
| 7  | >51                                               | 29 (13.5%)   |            |
| 8  |                                                   |              |            |
| 9  |                                                   |              |            |
| 10 | <b>Sex</b>                                        |              |            |
| 11 | Female                                            | 146 (67.9%)  |            |
| 12 | Male                                              | 69 (32.1 %)  |            |
| 13 |                                                   |              |            |
| 14 | <b>Level of education</b>                         |              |            |
| 15 | No education                                      | 10 (4.7%)    |            |
| 16 | Primary education                                 | 160 (74.4%)  |            |
| 17 | Secondary education                               | 42 (19.5%)   |            |
| 18 | Higher education                                  | 3 (1.4%)     |            |
| 19 |                                                   |              |            |
| 20 | <b>Employment Status</b>                          |              |            |
| 21 | Not employed                                      | 117 (54.4%)  |            |
| 22 | Employed                                          | 98 (45.6%)   |            |
| 23 |                                                   |              |            |
| 24 | <b>Marital status</b>                             |              |            |
| 25 | Ever married                                      | 102 (47.4%)  |            |
| 26 | Never married                                     | 113 (52.6%)  |            |
| 27 |                                                   |              |            |
| 28 | <b>Body mass index (kg/m<sup>2</sup>)</b>         |              | 22.9 ± 4.3 |
| 29 | Underweight                                       | 28 (13.0%)   |            |
| 30 | Normal weight                                     | 128 (59.5%)  |            |
| 31 | Overweight/Obese                                  | 59 (27.4%)   |            |
| 32 |                                                   |              |            |
| 33 | <b>WHO HIV clinical stages</b>                    |              |            |
| 34 | Stage I                                           | 133 (61.9%)  |            |
| 35 | Stage II                                          | 30 (14.0%)   |            |
| 36 | Stage III                                         | 44 (20.5%)   |            |
| 37 | Stage IV                                          | 8 (3.7%)     |            |
| 38 |                                                   |              |            |
| 39 | <b>CD4 cell counts (cells/mm<sup>3</sup>)</b>     |              | 401 ± 253  |
| 40 | <200                                              | 55 (25.6%)   |            |
| 41 | 200-350                                           | 38 (17.7%)   |            |
| 42 | 351-500                                           | 39 (18.1%)   |            |
| 43 | >500                                              | 83 (38.6%)   |            |
| 44 |                                                   |              |            |
| 45 | <b>Lymphocyte counts (x10<sup>9</sup>cells/L)</b> |              | 1.6 ± 1.2  |
| 46 | <1                                                | 83 (38.6%)   |            |
| 47 | 1-4                                               | 126 (58.6%)  |            |
| 48 | >4                                                | 6 (2.8%)     |            |
| 49 |                                                   |              |            |
| 50 | <b>Proteinuria</b>                                |              |            |
| 51 | No proteinuria                                    | 104 (48.4 %) |            |
| 52 | 1+ (30 – 100 mg/dl)                               | 80 (37.2%)   |            |
| 53 |                                                   |              |            |
| 54 |                                                   |              |            |
| 55 |                                                   |              |            |
| 56 |                                                   |              |            |
| 57 |                                                   |              |            |
| 58 |                                                   |              |            |
| 59 |                                                   |              |            |
| 60 |                                                   |              |            |

|                       |            |
|-----------------------|------------|
| 2+ (100 – 300 mg/dl)  | 27 (12.6%) |
| 3+ (300 – 1000 mg/dl) | 4 (1.9%)   |

213 CD4: Cluster of differentiation 4; HIV: Human Immunodeficiency Virus; SD: Standard Deviation

214

215

216 **Table 2. Predictors of HIV viral load non-suppression at six months among 215 ART naïve**  
 217 **participants initiating ART, Dar es Salaam, Tanzania, 2019.**

| Variable                             | Total | HIV non-suppression at six months n (%) | RR (95% CI)       | Adjusted RR (95% CI) |
|--------------------------------------|-------|-----------------------------------------|-------------------|----------------------|
| <b>Age (years)</b>                   |       |                                         |                   |                      |
| < 40                                 | 136   | 26 (19%)                                | 1                 | 1                    |
| ≥40                                  | 79    | 20 (25%)                                | 1.32 (0.79-2.21)  | 1.43 (0.91-2.26)     |
| <b>Sex</b>                           |       |                                         |                   |                      |
| Female                               | 146   | 35 (24%)                                | 1.50 (0.81-2.78)  | 1.27 (0.73-2.20)     |
| Male                                 | 69    | 11 (16%)                                | 1                 | 1                    |
| <b>Level of Education</b>            |       |                                         |                   |                      |
| Primary or less                      | 170   | 37 (22%)                                | 1                 |                      |
| Secondary or higher                  | 45    | 9 (20%)                                 | 0.92 (0.48-1.76)  |                      |
| <b>Employment Status</b>             |       |                                         |                   |                      |
| Not employed                         | 117   | 24 (21%)                                | 1                 |                      |
| Employed                             | 98    | 22 (22%)                                | 1.09 (0.66-1.83)  |                      |
| <b>Marital status</b>                |       |                                         |                   |                      |
| Never married                        | 113   | 19 (17%)                                | 1                 | 1                    |
| Ever married                         | 102   | 27 (26%)                                | 1.57 (0.93-2.66)  | 1.34 (0.84-2.16)     |
| <b>Body mass index</b>               |       |                                         |                   |                      |
| Change from baseline to three months |       |                                         |                   |                      |
| Loss >5%                             | 28    | 17 (61%)                                | 4.93 (2.41-10.09) |                      |
| Stable                               | 122   | 21 (17%)                                | 1.40 (0.66-2.99)  |                      |
| Gain >5 %                            | 65    | 8 (12%)                                 | 1                 |                      |
| Change from baseline to six months   |       |                                         |                   |                      |
| Loss >5%                             | 20    | 16 (80%)                                | 7.11 (3.69-13.69) | 2.73 (1.36-5.47)     |
| Stable                               | 115   | 21 (18%)                                | 1.62 (0.78-3.36)  | 1.87 (0.95-3.68)     |
| Gain >5 %                            | 80    | 9 (11%)                                 | 1                 | 1                    |
| <b>HIV clinical stage</b>            |       |                                         |                   |                      |
| I                                    | 133   | 24 (18%)                                | 1                 | 1                    |
| II                                   | 30    | 8 (27%)                                 | 1.48 (0.74-2.97)  | 1.14 (0.63-2.08)     |
| III and IV                           | 52    | 14 (27%)                                | 1.49 (0.84-2.66)  | 0.82 (0.51-1.31)     |

|                                                                   |     |          |                   |                  |
|-------------------------------------------------------------------|-----|----------|-------------------|------------------|
| <b>Total lymphocyte count change from baseline to six months</b>  |     |          |                   |                  |
| Ended lymphopaenic                                                | 37  | 27 (73%) | 7.66 (4.32-13.60) | 4.54 (2.19-9.39) |
| Lymphopaenic to normal                                            | 52  | 7 (13%)  | 1.41 (0.59-3.40)  | 1.59 (0.66-3.80) |
| Lymphopaenia not seen                                             | 126 | 12 (10%) | 1                 | 1                |
| <b>Pattern of change in proteinuria</b>                           |     |          |                   |                  |
| Proteinuria at 6 months regardless of baseline proteinuria status | 37  | 24 (65%) | 6.73 (3.34-13.58) | 2.63 (1.25-5.54) |
| Proteinuria at baseline and/or 3 months but not 6 months          | 95  | 14 (15%) | 1.53 (0.67-3.47)  | 1.26 (0.62-2.57) |
| No proteinuria seen                                               | 83  | 8 (10%)  | 1                 | 1                |

218 CI: confidence interval; RR: relative risk; ART: antiretroviral therapy.

219 Univariable and multivariable analysis by modified Poisson regression.

220

221 BMI and CD4 count were directly correlated at baseline, 3, and 6 months. TLC and CD4 count  
 222 were moderately positively correlated; while urine protein and CD4 count were inversely  
 223 correlated (see Supplementary Figures 1, 2, and 3 in Additional file 1).

224

225 **Predictors of viral non-suppression at six months among individuals with HIV initiated on**

226 **ART**

227 Only 46 participants (21%) were not virally suppressed at six months. The strongest clinical  
 228 predictors of viral non-suppression in the multivariable analysis were lymphopaenia at six months  
 229 irrespective of baseline lymphocyte status, with 73% of participants with lymphopaenia at six  
 230 months not being suppressed. After adjusting for other factors, lymphopaenia at six months was  
 231 associated with HIV non-suppression {RR = 4.54, 95% CI (2.19-9.39)}. Among participants with

1  
2  
3 232 a drop in body mass index at six months of 5% or more from baseline, 80% were non-suppressed  
4  
5 233 {RR = 2.73; 95% CI (1.36-5.47)}. In an alternative analysis, we considered BMI changes of 10%,  
6  
7 234 but only 9 of the non-suppressed participants (20%) had such large decreases. The risk of HIV  
8  
9 235 non-suppression at six months was higher among participants with proteinuria at six months {RR  
10  
11 236 = 2.63; 95% CI (1.25-5.54)}, Table 2. The area under the Receiver Operating Characteristic (ROC)  
12  
13 237 curve for the multivariable model was 0.895 (Fig 2). Baseline HIV stage was not related to HIV  
14  
15 238 non-suppression at six months, {adjusted RR = 1.14, 95% CI (0.63-2.08)} for baseline WHO HIV  
16  
17 239 clinical stage II and {adjusted RR = 0.82, 95% CI (0.51-1.31)} for advanced baseline WHO HIV  
18  
19 240 clinical stages (III and IV)}.

20  
21  
22  
23  
24 241 Using the rounded coefficients of the three variables in a model containing only these variables,  
25  
26 242 which all rounded to 1, we made a “prediction score” with values 0 (n=154, of which 10 were non-  
27  
28 243 suppressed), 1 (n=36, 13 non-suppressed), 2 (n=17, 15 non-suppressed), and 3 (n=8, all non-  
29  
30 244 suppressed). The median value of this score among the non-suppressed was 1.5 and the first  
31  
32 245 quartile value was 1. Thus, having any 2 of the risk factors would be a conservative predictor of  
33  
34 246 non-suppression, and having any one would be less conservative.  
35  
36  
37  
38  
39  
40  
41  
42  
43  
44  
45  
46  
47  
48  
49  
50  
51  
52  
53  
54  
55  
56  
57  
58  
59  
60

1  
2  
3 247 **Figure 2. Receiver Operating Characteristic curve assessing a model using BMI decrease,**  
4  
5 248 **proteinuria, and total lymphocyte counts to predict viral non-suppression among ART naïve**  
6  
7 249 **individuals with HIV initiated on ART in Dar es Salaam, Tanzania, 2019**  
8  
9

10  
11 250

12  
13  
14 251

15  
16  
17 252 Using the median score among the non-suppressed as a cut-off (equivalent to having any two of  
18  
19 253 the components), the sensitivity predicting non-suppression was 0.50, and the specificity was 0.99.

20  
21 254 Only 12% of the study population met this criterion. When we lowered the cut-off scores to the  
22  
23 255 first quartile value among the non-suppressed (i.e. any one of the components), the sensitivity was

24  
25  
26 256 0.78 and the specificity was 0.85, with 28% of the study population meeting this criterion.  
27  
28

29  
30 257  
31  
32  
33  
34  
35  
36  
37  
38  
39  
40  
41  
42  
43  
44  
45  
46  
47  
48  
49  
50  
51  
52  
53  
54  
55  
56  
57  
58  
59  
60

## 258 Discussion

259 This cohort study recruited ART naïve individuals with HIV from three care and treatment centres  
260 in Dar es Salaam, Tanzania, with the aim of assessing the utility of total lymphocyte count, body  
261 mass index, and proteinuria in predicting ART responses at six months. The intention of this study  
262 is not to replace CD4 cell count testing and HIV viral load monitoring but to assist clinicians when  
263 faced with decision making if these standard monitoring parameters are not easily accessible.  
264 Contrary to earlier studies done when the ART medications were not as effective as the current  
265 ones [12], patient characteristics at ART initiation did not affect the probability of viral non-  
266 suppression at six months, whereas patterns of change and the patient's status at 6 months were  
267 highly predictive.

268 Baseline WHO HIV clinical stage did not help predict HIV non-suppression at six months,  
269 possibly because under the current "Test and Treat" strategy [21], most individuals initiating ART  
270 are in WHO HIV clinical stages I and II (76% of our sample). Current therapy is highly effective  
271 except for a few patients whose disease is so advanced that they die before the medication can  
272 improve their immune status (2 patients in this study). Symptomatic individuals with advanced  
273 HIV will likely adhere to treatment to alleviate their symptoms. Perhaps patients with advanced  
274 disease fear death and therefore are motivated to adhere to ART, with eventual viral suppression.  
275 Advanced HIV disease has been shown to be linked with ART adherence [22]. Some studies,  
276 however, indicate that early HIV stages are linked with high ART adherence and viral suppression  
277 [23].

278 Lymphopaenia at six months, a decrease in body mass index of 5% or more from baseline, and  
279 proteinuria predicted HIV non-suppression at six months. Lymphopaenia at six months was the  
280 strongest predictor for HIV non-suppression at six months. Lymphopaenia at six months predicted



1  
2  
3 281 HIV non-suppression irrespective of a participant's lymphocyte count (normal or low) before ART  
4  
5 282 initiation. CD4 cells are a subset of lymphocytes and therefore lymphopaenia could be indicative  
6  
7 283 of a decline in CD4 cells, as a result of high HIV replication with high viral load signifying viral  
8  
9  
10 284 non-suppression with consequent CD4 cell destruction. Lymphopaenia was significantly  
11  
12 285 associated with CD4 <500 cells/mm<sup>3</sup> at all time points. In this study, an increase in total  
13  
14 286 lymphocyte cell count from lymphopaenia to normal lymphocyte counts from baseline to six  
15  
16  
17 287 months was significantly associated with an increase in CD4 cell count (Additional file 1). Total  
18  
19 288 lymphocyte count is sensitive and specific in predicting CD4 cell counts [16][24] though there  
20  
21  
22 289 have been contradictory reports [25]. The assessment of total lymphocyte counts among patients  
23  
24 290 on ART, therefore, could serve as an alternative, especially in settings with limited availability of  
25  
26 291 CD4 cell count measurement. A drop in total lymphocyte count in such a setting can alert a  
27  
28 292 clinician to the likelihood of immunological failure. A drop in lymphocytes could also signal the  
29  
30  
31 293 possibility of immunological non responders, who will need primary and secondary prophylaxis  
32  
33 294 for opportunistic infection.

34  
35  
36 295 Weight loss with consequent BMI drop of 5% or more at six months while on ART from weight  
37  
38 296 prior to ART initiation, predicts HIV non-suppression, though HIV non-suppression was not  
39  
40 297 associated with being underweight prior to ART initiation, perhaps because of the low prevalence  
41  
42  
43 298 of underweight leading to low power. In this study, sustained weight gain was significantly  
44  
45 299 associated with viral suppression and sustained weight loss was associated with viral non-  
46  
47  
48 300 suppression at six months of ART. An increase in weight and hence BMI may be a sign of immune  
49  
50 301 status improvement signalling a return to health [26] [27]and improved survival [28], while a  
51  
52 302 decrease in weight and hence BMI may be a sign of HIV progression or decline in CD4 cell counts  
53  
54 303 [5][11][29]. Weight loss may be due to HIV itself, opportunistic infections, or HIV-associated

1  
2  
3 304 tumours. Failure to gain weight has been associated with efavirenz toxicity over time as was  
4  
5 305 observed in a study in South Africa [30]. Weight loss in both ART naïve and exposed patients has  
6  
7 306 been associated with increased morbidity and mortality [31][32]. A study in England observed that  
8  
9 307 each log<sub>10</sub> increase in HIV viral load was associated with a 0.92 kg decrease in body weight.  
10  
11 308 However, a decrease in viral load was not significantly associated with weight gain, contrary to  
12  
13 309 our study [33]. Since weight changes correlate with the virological response, losing weight should  
14  
15 310 be viewed as an alarming sign of virological failure. Monitoring of weight and body mass index  
16  
17 311 prior to ART initiation and during follow up is a valuable inexpensive way of identifying  
18  
19 312 individuals with possible treatment failure. In an alternative analysis, we considered BMI changes  
20  
21 313 of 10%, but only 9 of the non-suppressed participants (20%) had such large decreases, making the  
22  
23 314 10% decrease not useful as a cut-off in our situation.

24  
25  
26  
27  
28  
29 315 Half of the ART-naïve study participants had proteinuria, similar to a report from Zimbabwe [34].  
30  
31 316 The presence of proteinuria was associated with HIV non-suppression. Proteinuria at six months  
32  
33 317 was a strong predictor of HIV non-suppression. Proteinuria in individuals with HIV is attributed  
34  
35 318 to a direct effect of HIV on the glomerular and tubular epithelial cells with the progression of HIV  
36  
37 319 disease to AIDS, nephrotoxicity from ART, the progression of chronic kidney disease and death  
38  
39 320 [14][35]. The higher the viral load, the greater the damage to the kidney [36]. We observed a  
40  
41 321 significant proportion of participants with proteinuria of 2+ or above in WHO HIV clinical stage  
42  
43 322 IV. This underscores the fact that, as HIV disease advances, the greater the damage to the kidneys  
44  
45 323 as evidenced by increasing proteinuria. Therefore, routine screening for renal disease may serve  
46  
47 324 not only as a follow-up of renal disease progression but also for HIV treatment response  
48  
49 325 monitoring.  
50  
51  
52  
53  
54  
55  
56  
57  
58  
59  
60

1  
2  
3 326 Our findings require validation in a study with a larger sample size. Our small sample may have  
4  
5 327 constrained some predictors of viral non-suppression. Similar studies conducted in different  
6  
7 328 locations are also needed since local conditions and treatment standards may influence some  
8  
9  
10 329 observed patterns, both in prevalence and effect. Furthermore, use of new antiviral drugs and  
11  
12 330 changes in patient characteristics at presentation may change our estimates, and possibly the  
13  
14 331 important predictor variables. We recommend further studies to examine the relationship between  
15  
16 332 virological response and anaemia as well as opportunistic infections and AIDS associated  
17  
18 333 malignancies especially now that ART is initiated early.

19  
20  
21  
22 334 One strength of our study is the cohort design with complete follow up data at three and six months  
23  
24 335 for 98% of the enrolled participants. Although our scoring system is crude, it is easy to compute  
25  
26 336 and is likely to be valid for a wide variety of situations, whereas a score based on more precise  
27  
28 337 computations would at best work only in our location.

29  
30  
31  
32 338

### 33 339 **Conclusion**

34  
35  
36  
37  
38 340 A drop in BMI by more than 5%, persistent lymphopaenia or decrease in total lymphocyte count  
39  
40 341 to lymphopaenia, and proteinuria at six months are associated with HIV non-suppression at 6  
41  
42 342 months after ART initiation. Scores based on these parameters are easy to use and can serve as  
43  
44 343 alternatives to CD4 cell counts and viral load assessment in facilities with scarcity.

### 45 46 47 48 344 **List of abbreviations**

49  
50  
51 345 AIDS: Acquired immunodeficiency syndrome

52  
53  
54 346 ART: Antiretroviral therapy

1  
2  
3 347 BMI: Body mass index  
4

5  
6 348 CD4: Cluster of differentiation 4  
7

8  
9 349 HIV: Human immunodeficiency virus  
10

11  
12 350 TLC: Total lymphocyte counts  
13

14  
15 351 WHO: World Health Organization  
16

17  
18 352  
19

20  
21 353  
22

23  
24 354 **Acknowledgements**  
25

26  
27 355 We are grateful to the participants for their willingness to take part in this study and to the health  
28  
29 356 workers from Temeke regional referral hospital, Mbagala Rangi-tatu district hospital, and  
30  
31 357 Mbagala Kizuiani dispensary for their assistance in participant recruitment and data collection.  
32  
33

34 358 **Author Contributions**  
35

36  
37 359 Study design: LJ and PM; data collection: LJ and PM; Data analysis and interpretation: LJ, PM,  
38  
39 360 BT and EH; Manuscript writing: LJ, PM, BT and EH. All the authors gave final approval of the  
40  
41 361 manuscript.  
42  
43

44  
45 362  
46

47  
48 363 **Funding**  
49

50  
51 364 This research received no specific grant from any funding agency in the public, commercial or  
52  
53 365 not-for-profit sectors.  
54  
55

1  
2  
3 366 **Competing interests**  
4

5  
6 367 None declared.  
7  
8

9 368 **Patient consent for publication**  
10

11  
12 369 Not applicable.  
13  
14

15 370 **Ethics approval**  
16

17  
18 371 Ethical approval was obtained from the Research and Publications Committee of Muhimbili  
19  
20 372 University of Health and Allied Sciences (Ref. No. DA.287/298/01A). Permission to conduct the  
21  
22 373 study was obtained from Temeke Municipal Hospital administration. Participants were enrolled  
23  
24 374 after providing written informed consent. The confidentiality of patient information was ensured.  
25  
26 375 Participants without viral suppression at the 6<sup>th</sup> month of follow up were managed according to  
27  
28 376 Tanzania National Guidelines for management of HIV and AIDS.  
29  
30

31  
32 377 **Data availability statement**  
33

34  
35 378 The dataset analysed during the current study is available upon reasonable request to the  
36  
37 379 corresponding author.  
38  
39

40  
41 380 **ORCID iDs**  
42

43  
44 381 Basil Tumaini: <https://orcid.org/0000-0002-2894-1684>  
45

46 382 Ellen Hertzmark: <https://orcid.org/0000-0003-0148-2761>  
47

48 383 **Ethics Statement**  
49

50  
51 384 Muhimbili University of Health and Allied Sciences Institutional Review Board with reference  
52  
53 385 number DA287/298/01A/  
54

55  
56 386  
57

1  
2  
3 387 **References**

- 4  
5  
6 388 1. UNAIDS. UNAIDS data 2020 | UNAIDS [Internet]. 2020 [cited 2020 Aug 19].  
7  
8 389 <https://www.unaids.org/en/resources/documents/2020/unaids-data>  
9  
10  
11 390 2. World Health Organization. Consolidated guidelines on the use of antiretroviral drugs for  
12  
13 391 treating and preventing HIV infection: recommendations for a public health approach.  
14  
15 World Health Organization; 2016.  
16 392  
17 [https://apps.who.int/iris/bitstream/handle/10665/208825/9789241549684\\_eng.pdf](https://apps.who.int/iris/bitstream/handle/10665/208825/9789241549684_eng.pdf)  
18 393  
19  
20  
21 394 3. Roberts T, Bygrave H, Fajardo E, Ford N. Challenges and opportunities for the  
22  
23 395 implementation of virological testing in resource-limited settings. *Journal of the*  
24  
25 *International AIDS Society*. 2012;15(2):17324. <https://doi.org/10.7448/IAS.15.2.17324>  
26 396  
27 PMID: 23078767  
28 397  
29  
30  
31 398 4. Sepkowitz KA. AIDS - the first 20 years. *New England Journal of Medicine*.  
32  
33 399 2001;344(23):1764-72. <https://www.nejm.org/doi/full/10.1056/NEJM200106073442306>  
34  
35 PMID: 11396444  
36 400  
37  
38  
39 401 5. Mangili A, Murman DH, Zampini AM, Wanke CA, Mayer KH. Nutrition and HIV  
40  
41 402 infection: review of weight loss and wasting in the era of highly active antiretroviral  
42  
43 403 therapy from the nutrition for healthy living cohort. *Clinical Infectious Diseases*.  
44  
45 404 2006;42(6):836-42. <https://doi.org/10.1086/500398> PMID: 16477562  
46  
47  
48  
49 405 6. Koethe JR, Lukusa A, Giganti MJ, Chi BH, Nyirenda CK, Limbada MI, et al. Association  
50  
51 406 between weight gain and clinical outcomes among malnourished adults initiating  
52  
53 407 antiretroviral therapy in Lusaka, Zambia. *Journal of Acquired Immune Deficiency*  
54  
55 408 *Syndromes*. 2010;53(4):507-13.

- 1  
2  
3 409 [https://journals.lww.com/jaids/Fulltext/2010/04010/Association\\_Between\\_Weight\\_Gain\\_](https://journals.lww.com/jaids/Fulltext/2010/04010/Association_Between_Weight_Gain_and_Clinical.12.aspx)  
4  
5 and\_Clinical.12.aspx PMID: 19730111  
6 410  
7  
8 411 7. Mannheimer S, Friedland G, Matts J, Child C, Chesney M. The consistency of adherence  
9  
10 to antiretroviral therapy predicts biologic outcomes for Human Immunodeficiency Virus -  
11 412  
12 infected persons in clinical trials. *Clinical Infectious Diseases*. 2002;34(8):1115-21.  
13 413  
14 <https://doi.org/10.1086/339074> PMID: 11915001  
15 414  
16  
17  
18 415 8. Paton NI, Sangeetha S, Earnest A, Bellamy R. The impact of malnutrition on survival and  
19  
20 the CD4 count response in HIV-infected patients starting antiretroviral therapy. *HIV*  
21 416  
22 *medicine*. 2006;7(5):323-30. <https://doi.org/10.1111/j.1468-1293.2006.00383.x> PMID:  
23 417  
24 16945078  
25 418  
26  
27  
28 419 9. Wittkop L, Arsandaux J, Trevino A, Schim van der Loeff M, Anderson J, van Sighem A,  
29  
30 et al. CD4 cell count response to first-line combination ART in HIV-2+ patients compared  
31 420  
32 with HIV-1+ patients: a multinational, multicohort European study. *Journal of*  
33 421  
34 *Antimicrobial Chemotherapy*. 2017;72(10):2869-78. <https://doi.org/10.1093/jac/dkx210>  
35 422  
36 PMID: 29091198  
37 423  
38  
39  
40 424 10. Kanya MR, Mayanja-Kizza H, Kambugu A, Bakeera-Kitaka S, Semitala F, Mwebaze-  
41  
42 Songa P, et al. Predictors of long-term viral failure among Ugandan children and adults  
43 425  
44 treated with antiretroviral therapy. *Journal of Acquired Immune Deficiency Syndromes*.  
45 426  
46 2007;46(2):187-93. PMID: 17693883  
47 427  
48  
49  
50 428 11. Olaleye AO, Owhonda G, Daramola O, Adejo I, Olayiwola H, Inyang JI, et al. Factors  
51  
52 associated with weight gain among adult patients initiating antiretroviral therapy in Port  
53 429  
54 Harcourt, Nigeria: a retrospective cohort study. *Infectious Diseases*. 2017;49(8):635-8.  
55 430  
56  
57  
58  
59  
60

- 1  
2  
3 431 <https://doi.org/10.1080/23744235.2017.1306102> PMID: 28335659  
4  
5  
6 432 12. Liu E, Spiegelman D, Semu H, Hawkins C, Chalamilla G, Aveika A, et al. Nutritional  
7  
8 433 status and mortality among HIV-infected patients receiving antiretroviral therapy in  
9  
10 434 Tanzania. *Journal of Infectious Diseases*. 2011;204(2):282-90.  
11  
12 <https://doi.org/10.1093/infdis/jir246> PMID: 21673040  
13 435  
14  
15  
16 436 13. Husain NE, Ahmed MH, Almobarak AO, Noor SK, Elmadhoun WM, Awadalla H, et al.  
17  
18 437 HIV-associated nephropathy in Africa: pathology, clinical presentation and strategy for  
19  
20 438 prevention. *Journal of Clinical Medicine Research*. 2018;10(1):1-8.  
21  
22 <https://doi.org/10.14740/jocmr3235w> PMID: 29238427  
23 439  
24  
25  
26 440 14. Szczech LA, Hoover DR, Feldman JG, Cohen MH, Gange SJ, Goozé L, et al. Association  
27  
28 441 between renal disease and outcomes among HIV-infected women receiving or not  
29  
30 442 receiving antiretroviral therapy. *Clinical Infectious Diseases*. 2004;39(8):1199-206.  
31  
32 <https://doi.org/10.1086/424013> PMID: 15486845  
33 443  
34  
35  
36 444 15. Imlach S, McBreen S, Shirafuji T, Leen C, Bell JE, Simmonds P. Activated peripheral  
37  
38 445 CD8 lymphocytes express CD4 in vivo and are targets for infection by Human  
39  
40 446 Immunodeficiency Virus Type 1. *Journal of Virology*. 2001;75(23):11555-64.  
41  
42 <https://doi.org/10.1128/JVI.75.23.11555-11564.2001> PMID: 11689637  
43 447  
44  
45  
46 448 16. Obirikorang C, Quaye L, Acheampong I. Total lymphocyte count as a surrogate marker  
47  
48 449 for CD4 count in resource-limited settings. *BMC Infectious Diseases*. 2012;12:128.  
49  
50 450 <https://doi.org/10.1186/1471-2334-12-128> PMID: 22676809  
51  
52  
53 451 17. The United Republic of Tanzania; Ministry of Health, Community Development, Gender,  
54  
55 452 Elderly and Children; National AIDS Control Programme. National guidelines for the



- 1  
2  
3 453 management of HIV and AIDS. 6th Ed, 2017. Available from:  
4  
5 454 <https://www.differentiatedservicedelivery.org/Portals/0/adam/Content/NqQGryocrU2RTj5>  
6  
7 455 8iR37uA/File/Tanzania\_NATIONAL GUIDELINES FOR MANAGEMENT OF HIV  
8  
9 456 AND AIDS 6TH EDITION 2017.pdf  
10  
11  
12  
13 457 18. World Health Organization. Obesity: preventing and managing the global epidemic. WHO  
14  
15 458 Technical Report Series. 2000(894).  
16  
17 459 [https://www.who.int/nutrition/publications/obesity/WHO\\_TRS\\_894/en/](https://www.who.int/nutrition/publications/obesity/WHO_TRS_894/en/)  
18  
19  
20 460 [https://www.who.int/nutrition/publications/obesity/WHO\\_TRS\\_894/en/](https://www.who.int/nutrition/publications/obesity/WHO_TRS_894/en/)  
21  
22  
23 461 19. Spiegelman D, Hertzmark E. Easy SAS calculations for risk or prevalence ratios and  
24  
25 462 differences. American Journal of Epidemiology. 2005; 162(3):199-200.  
26  
27 463 <https://doi.org/10.1093/aje/kwi188> PMID: 15987728  
28  
29  
30  
31 464 20. Dwivedi AK, Mallawaarachchi I, Lee S, Tarwater P. Methods for estimating relative risk  
32  
33 465 in studies of common binary outcomes. Journal of Applied Statistics. 2014; 41(3):484-  
34  
35 466 500. <https://doi.org/10.1080/02664763.2013.840772>  
36  
37  
38  
39 467 21. WHO. The use of antiretroviral drugs for treating and preventing HIV infection guidelines  
40  
41 468 HIV/AIDS Programme. 2016 [cited 2021 Jan 19].  
42  
43 469 [http://apps.who.int/iris/bitstream/10665/85322/1/WHO\\_HIV\\_2013.7\\_eng.pdf](http://apps.who.int/iris/bitstream/10665/85322/1/WHO_HIV_2013.7_eng.pdf)  
44  
45  
46 470 22. Biressaw S, Abegaz WE, Abebe M, Taye WA, Belay M. Adherence to Antiretroviral  
47  
48 471 Therapy and associated factors among HIV infected children in Ethiopia: Unannounced  
49  
50 472 home-based pill count versus caregivers' report. BMC Pediatrics. 2013;13:132.  
51  
52 473 <https://doi.org/10.1186/1471-2431-13-132> PMID: 24229394  
53  
54  
55  
56  
57  
58  
59  
60

- 1  
2  
3 474 23. Haberer JE, Bwana BM, Orrell C, Asiimwe S, Amanyire G, Musinguzi N, et al. ART  
4  
5 475 adherence and viral suppression are high among most non-pregnant individuals with  
6  
7 476 early-stage, asymptomatic HIV infection: an observational study from Uganda and South  
8  
9 477 Africa. *Journal of the International AIDS Society*. 2019;22(2):e25232.  
10  
11  
12 478 <https://doi.org/10.1002/jia2.25232> PMID: 30746898  
13  
14  
15 479 24. Kwantwi LB, Tunu BK, Boateng D, Quansah DY. Body Mass Index, Haemoglobin, and  
16  
17 480 Total Lymphocyte Count as a Surrogate for CD4 Count in Resource Limited Settings. *J*  
18  
19 481 *Biomarkers*. 2017; 2017: 7907352.  
20  
21  
22 482 <https://www.ncbi.nlm.nih.gov/pmc/articles/PMC5412137/> PMID: 28484663  
23  
24  
25 483 25. Akinola NO, Olasode O, Adediran IA, Onayemi O, Murainah A, Irinoye O, et al. The  
26  
27 484 search for a predictor of CD4 cell count continues: Total lymphocyte count is not a  
28  
29 485 substitute for CD4 cell count in the management of HIV-infected individuals in a  
30  
31 486 resource-limited setting. *Clinical Infectious Diseases*. 2004;39(4):579–81.  
32  
33 487 <https://doi.org/10.1086/422722> PMID: 15356826  
34  
35  
36  
37 488 26. Koethe JR, Jenkins CA, Lau B, Shepherd BE, Wester W, Rebeiro PF, et al. Higher time-  
38  
39 489 updated body mass index: association with improved CD4+ cell recovery on HIV  
40  
41 490 treatment. *Journal of Acquired Immune Deficiency Syndromes*. 2016;73(2):197-204.  
42  
43 491 <https://dx.doi.org/10.1097%2FQAI.0000000000001035> PMID: 27116044  
44  
45  
46  
47 492 27. Biadgilign S, Reda AA, Digaffe T. Predictors of mortality among HIV infected patients  
48  
49 493 taking antiretroviral treatment in Ethiopia: a retrospective cohort study. *AIDS research*  
50  
51 494 *and therapy*. 2012;9:15. <https://doi.org/10.1186/1742-6405-9-15> PMID: 22606951  
52  
53  
54  
55 495 28. Reda AA, Biadgilign S, Deribew A, Gebre B, Deribe K. Predictors of Change in CD4  
56  
57

- 1  
2  
3 496 Lymphocyte Count and Weight among HIV Infected Patients on Anti-Retroviral  
4  
5 497 Treatment in Ethiopia: A Retrospective Longitudinal Study. Ensoli B, editor. PLoS One.  
6  
7 498 2013;8(4):e58595. <https://doi.org/10.1371/journal.pone.0058595> PMID: 23573191  
9  
10  
11 499 29. Griesel R, Kawuma AN, Wasmann R, Sokhela S, Akpomiemie G, Venter WF, et al.  
12  
13 500 Concentration-response relationships of dolutegravir and efavirenz with weight change  
14  
15 501 after starting antiretroviral therapy. *British Journal of Clinical Pharmacology*. 2022; 88(3):  
16  
17 502 883- 893. <https://doi.org/10.1111/bcp.15177> PMID: 34954840  
19  
20  
21 503 30. Naidoo K, Yende-Zuma N, Augustine S. A retrospective cohort study of body mass index  
22  
23 504 and survival in HIV infected patients with and without TB co-infection. *Infectious*  
24  
25 505 *Diseases of Poverty*. 2018;7:35. <https://doi.org/10.1186/s40249-018-0418-3> PMID:  
26  
27 506 29690932  
29  
30  
31 507 31. Van der Sande MA, van der Loeff MF, Aveika AA, Sabally S, Togun T, Sarge-Njie R, et  
32  
33 508 al. Body mass index at time of HIV diagnosis: a strong and independent predictor of  
34  
35 509 survival. *Journal of Acquired Immune Deficiency Syndromes*. 2004;37(2):1288-94.  
36  
37 510 <https://doi.org/10.1097/01.qai.0000122708.59121.03> PMID: 15385737  
39  
40  
41 511 32. Grinspoon S, Mulligan K. Weight loss and wasting in patients infected with Human  
42  
43 512 Immunodeficiency Virus. *Clinical Infectious Diseases*. 2003;36(Supplement\_2):S69-78.  
44  
45 513 <https://doi.org/10.1086/367561> PMID: 12652374  
46  
47  
48 514 33. Mwamburi DM, Wilson IB, Jacobson DL, Spiegelman D, Gorbach SL, Knox TA, et al.  
49  
50 515 Understanding the role of HIV load in determining weight change in the era of highly  
51  
52 516 active antiretroviral therapy. *Clinical Infectious Diseases*. 2005;40(1):167-73.  
53  
54  
55 517 <https://doi.org/10.1086/426591> PMID: 15614708  
56  
57

- 1  
2  
3 518 34. Fana GT, Ndhlovu CE. Renal dysfunction among anti-retroviral therapy naïve HIV  
4  
5 519 infected patients in Zimbabwe. *The Central African Journal of Medicine*. 2011;57(1-4):1-  
6  
7 520 5. <https://www.ajol.info/index.php/cajm/article/view/73724> PMID: 24968654  
9  
10 521 35. Gupta SK, Smurzynski M, Franceschini N, Bosch RJ, Szczech LA, Kalayjian RC. The  
12  
13 522 effects of HIV-1 viral suppression and non-viral factors on quantitative proteinuria in the  
14  
15 523 HAART era. *Antiviral Therapy*. 2009;14(4): 543–549. PMID: 19578239  
16  
17  
18 524 36. Rednor SJ, Ross MJ. Molecular mechanisms of injury in HIV-associated nephropathy.  
19  
20 525 *Frontiers in Medicine*. 2018;5:177. <https://doi.org/10.3389/fmed.2018.00177> PMID:  
21  
22 29930940  
23 526  
24  
25  
26  
27  
28  
29  
30  
31  
32  
33  
34  
35  
36  
37  
38  
39  
40  
41  
42  
43  
44  
45  
46  
47  
48  
49  
50  
51  
52  
53  
54  
55  
56  
57  
58  
59  
60

1  
2  
3  
4  
5  
6  
7  
8  
9  
10  
11  
12  
13  
14  
15  
16  
17  
18  
19  
20  
21  
22  
23  
24  
25  
26  
27  
28  
29  
30  
31  
32  
33  
34  
35  
36  
37  
38  
39  
40  
41  
42  
43  
44  
45  
46  
47  
48  
49  
50  
51  
52  
53  
54  
55  
56  
57  
58  
59  
60



Figure 1. Consort diagram.  
146x105mm (300 x 300 DPI)

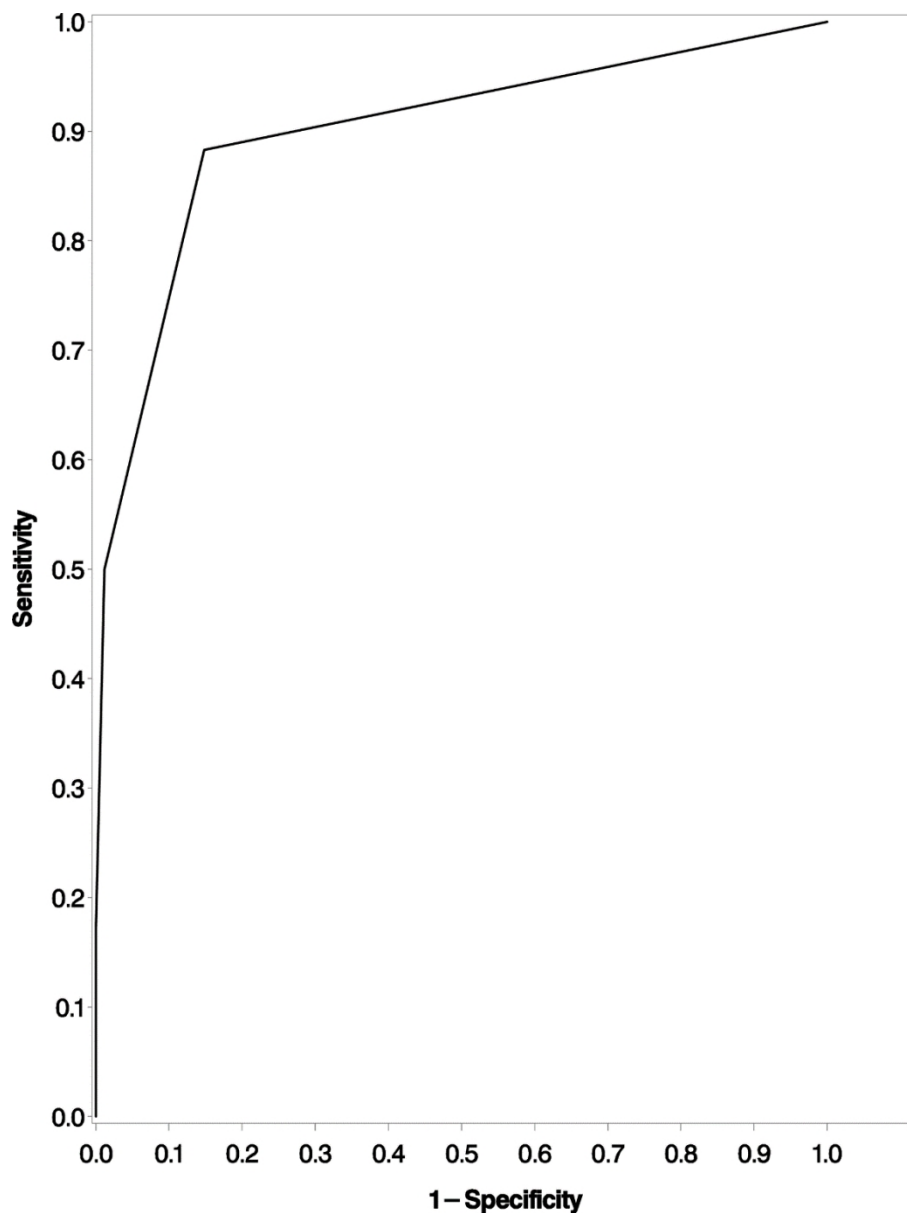

Figure 2. Receiver Operating Characteristic curve assessing a model using BMI decrease, proteinuria, and total lymphocyte counts to predict viral non-suppression among HIV-infected individuals initiated on ART in Dar es Salaam, Tanzania, 2019

137x181mm (220 x 220 DPI)

Supplementary Figure 1. Scatter plots of BMI and CD4 counts



rho 0.287, p <0.0001



rho 0.305, p <0.0001



rho 0.373, p <0.0001

Supplementary Figure 2. Scatter plots of total lymphocyte count and CD4 count



rho 0.613, p <0.0001



rho 0.650, p <0.0001

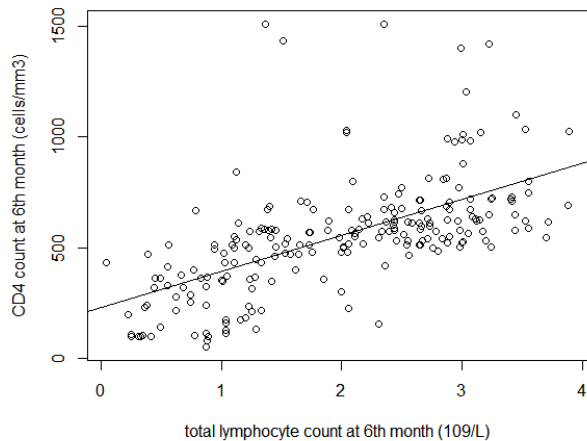

rho 0.602, p <0.0001



Supplementary Figure 3. Scatter plots of urine protein and CD4 count

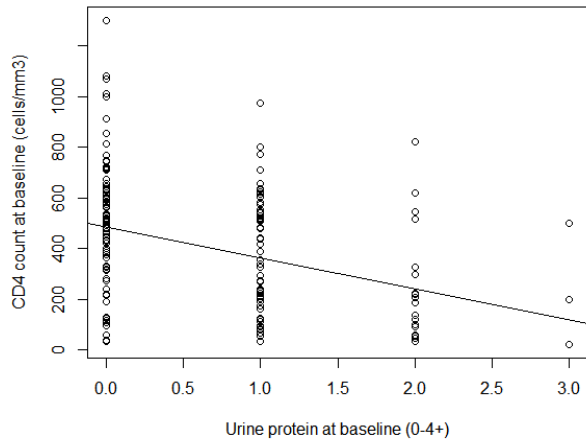

rho -0.364, p <0.0001

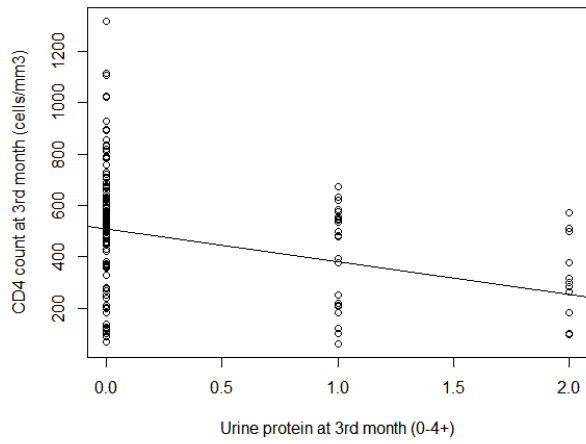

rho -0.334, p <0.0001

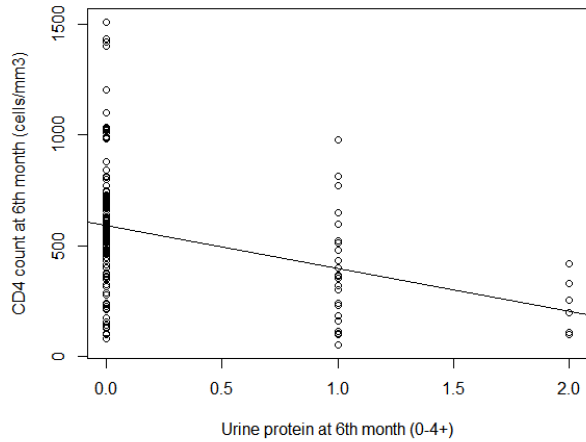

rho -0.372, p <0.0001

# Reporting checklist for cohort study.

Based on the STROBE cohort guidelines.

## Instructions to authors

Complete this checklist by entering the page numbers from your manuscript where readers will find each of the items listed below.

Your article may not currently address all the items on the checklist. Please modify your text to include the missing information. If you are certain that an item does not apply, please write "n/a" and provide a short explanation.

Upload your completed checklist as an extra file when you submit to a journal.

In your methods section, say that you used the STROBE cohort reporting guidelines, and cite them as:

von Elm E, Altman DG, Egger M, Pocock SJ, Gøtzsche PC, Vandenbroucke JP. The Strengthening of Reporting of Observational Studies in Epidemiology (STROBE) Statement: guidelines for reporting observational studies.

|                           |                     |                                                                                    | Page   |
|---------------------------|---------------------|------------------------------------------------------------------------------------|--------|
|                           |                     | Reporting Item                                                                     | Number |
| <b>Title and abstract</b> |                     |                                                                                    |        |
| Title                     | <a href="#">#1a</a> | Indicate the study's design with a commonly used term in the title or the abstract | 1      |
| Abstract                  | <a href="#">#1b</a> | Provide in the abstract an informative and balanced summary                        | 3      |

of what was done and what was found

## Introduction

Background / [#2](#) Explain the scientific background and rationale for the 6  
 rationale investigation being reported

Objectives [#3](#) State specific objectives, including any prespecified 7  
 hypotheses

## Methods

Study design [#4](#) Present key elements of study design early in the paper 8

Setting [#5](#) Describe the setting, locations, and relevant dates, including 8-10  
 periods of recruitment, exposure, follow-up, and data collection

Eligibility criteria [#6a](#) Give the eligibility criteria, and the sources and methods of 8-10  
 selection of participants. Describe methods of follow-up.

Eligibility criteria [#6b](#) For matched studies, give matching criteria and number of -  
 exposed and unexposed

Variables [#7](#) Clearly define all outcomes, exposures, predictors, potential 9,10  
 confounders, and effect modifiers. Give diagnostic criteria, if  
 applicable

Data sources / [#8](#) For each variable of interest give sources of data and details of 8-10  
 measurement methods of assessment (measurement). Describe  
 comparability of assessment methods if there is more than one  
 group. Give information separately for for exposed and  
 unexposed groups if applicable.

|    |                |                      |                                                                   |            |
|----|----------------|----------------------|-------------------------------------------------------------------|------------|
| 1  | Bias           | <a href="#">#9</a>   | Describe any efforts to address potential sources of bias         |            |
| 2  |                |                      |                                                                   |            |
| 3  |                |                      |                                                                   |            |
| 4  | Study size     | <a href="#">#10</a>  | Explain how the study size was arrived at                         | 8          |
| 5  |                |                      |                                                                   |            |
| 6  |                |                      |                                                                   |            |
| 7  | Quantitative   | <a href="#">#11</a>  | Explain how quantitative variables were handled in the            | 9-11       |
| 8  | variables      |                      | analyses. If applicable, describe which groupings were chosen,    |            |
| 9  |                |                      | and why                                                           |            |
| 10 |                |                      |                                                                   |            |
| 11 |                |                      |                                                                   |            |
| 12 |                |                      |                                                                   |            |
| 13 |                |                      |                                                                   |            |
| 14 |                |                      |                                                                   |            |
| 15 | Statistical    | <a href="#">#12a</a> | Describe all statistical methods, including those used to control |            |
| 16 | methods        |                      | for confounding                                                   |            |
| 17 |                |                      |                                                                   |            |
| 18 |                |                      |                                                                   |            |
| 19 |                |                      |                                                                   |            |
| 20 | 10,11          |                      |                                                                   |            |
| 21 |                |                      |                                                                   |            |
| 22 |                |                      |                                                                   |            |
| 23 | Statistical    | <a href="#">#12b</a> | Describe any methods used to examine subgroups and                | 10, 11     |
| 24 | methods        |                      | interactions                                                      |            |
| 25 |                |                      |                                                                   |            |
| 26 |                |                      |                                                                   |            |
| 27 |                |                      |                                                                   |            |
| 28 |                |                      |                                                                   |            |
| 29 | Statistical    | <a href="#">#12c</a> | Explain how missing data were addressed                           | 12         |
| 30 | methods        |                      |                                                                   |            |
| 31 |                |                      |                                                                   |            |
| 32 |                |                      |                                                                   |            |
| 33 |                |                      |                                                                   |            |
| 34 | Statistical    | <a href="#">#12d</a> | If applicable, explain how loss to follow-up was addressed        | -          |
| 35 | methods        |                      |                                                                   |            |
| 36 |                |                      |                                                                   |            |
| 37 |                |                      |                                                                   |            |
| 38 |                |                      |                                                                   |            |
| 39 | Statistical    | <a href="#">#12e</a> | Describe any sensitivity analyses                                 |            |
| 40 | methods        |                      |                                                                   |            |
| 41 |                |                      |                                                                   |            |
| 42 |                |                      |                                                                   |            |
| 43 |                |                      |                                                                   |            |
| 44 |                |                      |                                                                   |            |
| 45 | 11             |                      |                                                                   |            |
| 46 |                |                      |                                                                   |            |
| 47 |                |                      |                                                                   |            |
| 48 | <b>Results</b> |                      |                                                                   |            |
| 49 |                |                      |                                                                   |            |
| 50 |                |                      |                                                                   |            |
| 51 | Participants   | <a href="#">#13a</a> | Report numbers of individuals at each stage of study—eg           | 12         |
| 52 |                |                      | numbers potentially eligible, examined for eligibility, confirmed | (figure 1) |
| 53 |                |                      | eligible, included in the study, completing follow-up, and        |            |
| 54 |                |                      | analysed. Give information separately for for exposed and         |            |
| 55 |                |                      |                                                                   |            |
| 56 |                |                      |                                                                   |            |
| 57 |                |                      |                                                                   |            |
| 58 |                |                      |                                                                   |            |
| 59 |                |                      |                                                                   |            |
| 60 |                |                      |                                                                   |            |

unexposed groups if applicable.

|    |                  |                      |                                                               |
|----|------------------|----------------------|---------------------------------------------------------------|
| 1  |                  |                      |                                                               |
| 2  |                  |                      |                                                               |
| 3  |                  |                      |                                                               |
| 4  | Participants     | <a href="#">#13b</a> | Give reasons for non-participation at each stage              |
| 5  |                  |                      |                                                               |
| 6  |                  |                      | 12                                                            |
| 7  |                  |                      | (figure 1)                                                    |
| 8  |                  |                      |                                                               |
| 9  | Participants     | <a href="#">#13c</a> | Consider use of a flow diagram                                |
| 10 |                  |                      |                                                               |
| 11 |                  |                      |                                                               |
| 12 | 12 (figure 1)    |                      |                                                               |
| 13 |                  |                      |                                                               |
| 14 |                  |                      |                                                               |
| 15 | Descriptive data | <a href="#">#14a</a> | Give characteristics of study participants (eg demographic,   |
| 16 |                  |                      | clinical, social) and information on exposures and potential  |
| 17 |                  |                      | confounders. Give information separately for exposed and      |
| 18 |                  |                      | unexposed groups if applicable.                               |
| 19 |                  |                      |                                                               |
| 20 |                  |                      |                                                               |
| 21 |                  |                      |                                                               |
| 22 |                  |                      |                                                               |
| 23 |                  |                      |                                                               |
| 24 |                  |                      |                                                               |
| 25 | Descriptive data | <a href="#">#14b</a> | Indicate number of participants with missing data for each    |
| 26 |                  |                      | variable of interest                                          |
| 27 |                  |                      |                                                               |
| 28 |                  |                      |                                                               |
| 29 |                  |                      |                                                               |
| 30 | See 12           |                      |                                                               |
| 31 |                  |                      |                                                               |
| 32 |                  |                      |                                                               |
| 33 | Descriptive data | <a href="#">#14c</a> | Summarise follow-up time (eg, average and total amount)       |
| 34 |                  |                      |                                                               |
| 35 |                  |                      |                                                               |
| 36 | 12               |                      |                                                               |
| 37 |                  |                      |                                                               |
| 38 |                  |                      |                                                               |
| 39 | Outcome data     | <a href="#">#15</a>  | Report numbers of outcome events or summary measures          |
| 40 |                  |                      | over time. Give information separately for exposed and        |
| 41 |                  |                      | unexposed groups if applicable.                               |
| 42 |                  |                      |                                                               |
| 43 |                  |                      |                                                               |
| 44 |                  |                      |                                                               |
| 45 |                  |                      |                                                               |
| 46 |                  |                      |                                                               |
| 47 | 14               |                      |                                                               |
| 48 |                  |                      |                                                               |
| 49 |                  |                      |                                                               |
| 50 | Main results     | <a href="#">#16a</a> | Give unadjusted estimates and, if applicable, confounder-     |
| 51 |                  |                      | adjusted estimates and their precision (eg, 95% confidence    |
| 52 |                  |                      | interval). Make clear which confounders were adjusted for and |
| 53 |                  |                      | why they were included                                        |
| 54 |                  |                      |                                                               |
| 55 |                  |                      |                                                               |
| 56 |                  |                      |                                                               |
| 57 |                  |                      |                                                               |
| 58 |                  |                      |                                                               |
| 59 |                  |                      |                                                               |
| 60 |                  |                      |                                                               |

|    |                          |                      |                                                                      |       |
|----|--------------------------|----------------------|----------------------------------------------------------------------|-------|
| 1  | Main results             | <a href="#">#16b</a> | Report category boundaries when continuous variables were            | 12-15 |
| 2  |                          |                      | categorized                                                          |       |
| 3  |                          |                      |                                                                      |       |
| 4  |                          |                      |                                                                      |       |
| 5  |                          |                      |                                                                      |       |
| 6  | Main results             | <a href="#">#16c</a> | If relevant, consider translating estimates of relative risk into    |       |
| 7  |                          |                      | absolute risk for a meaningful time period                           |       |
| 8  |                          |                      |                                                                      |       |
| 9  |                          |                      |                                                                      |       |
| 10 |                          |                      |                                                                      |       |
| 11 |                          |                      |                                                                      |       |
| 12 | -                        |                      |                                                                      |       |
| 13 |                          |                      |                                                                      |       |
| 14 |                          |                      |                                                                      |       |
| 15 | Other analyses           | <a href="#">#17</a>  | Report other analyses done—eg analyses of subgroups and              | 16    |
| 16 |                          |                      | interactions, and sensitivity analyses                               |       |
| 17 |                          |                      |                                                                      |       |
| 18 |                          |                      |                                                                      |       |
| 19 |                          |                      |                                                                      |       |
| 20 | <b>Discussion</b>        |                      |                                                                      |       |
| 21 |                          |                      |                                                                      |       |
| 22 |                          |                      |                                                                      |       |
| 23 | Key results              | <a href="#">#18</a>  | Summarise key results with reference to study objectives             | 20    |
| 24 |                          |                      |                                                                      |       |
| 25 |                          |                      |                                                                      |       |
| 26 | Limitations              | <a href="#">#19</a>  | Discuss limitations of the study, taking into account sources of     | 5     |
| 27 |                          |                      | potential bias or imprecision. Discuss both direction and            |       |
| 28 |                          |                      | magnitude of any potential bias.                                     |       |
| 29 |                          |                      |                                                                      |       |
| 30 |                          |                      |                                                                      |       |
| 31 |                          |                      |                                                                      |       |
| 32 |                          |                      |                                                                      |       |
| 33 |                          |                      |                                                                      |       |
| 34 | Interpretation           | <a href="#">#20</a>  | Give a cautious overall interpretation considering objectives,       | 18-20 |
| 35 |                          |                      | limitations, multiplicity of analyses, results from similar studies, |       |
| 36 |                          |                      | and other relevant evidence.                                         |       |
| 37 |                          |                      |                                                                      |       |
| 38 |                          |                      |                                                                      |       |
| 39 |                          |                      |                                                                      |       |
| 40 |                          |                      |                                                                      |       |
| 41 |                          |                      |                                                                      |       |
| 42 | Generalisability         | <a href="#">#21</a>  | Discuss the generalisability (external validity) of the study        | 20    |
| 43 |                          |                      | results                                                              |       |
| 44 |                          |                      |                                                                      |       |
| 45 |                          |                      |                                                                      |       |
| 46 |                          |                      |                                                                      |       |
| 47 | <b>Other Information</b> |                      |                                                                      |       |
| 48 |                          |                      |                                                                      |       |
| 49 |                          |                      |                                                                      |       |
| 50 | Funding                  | <a href="#">#22</a>  | Give the source of funding and the role of the funders for the       | 22    |
| 51 |                          |                      | present study and, if applicable, for the original study on which    |       |
| 52 |                          |                      | the present article is based                                         |       |
| 53 |                          |                      |                                                                      |       |
| 54 |                          |                      |                                                                      |       |
| 55 |                          |                      |                                                                      |       |
| 56 |                          |                      |                                                                      |       |
| 57 |                          |                      |                                                                      |       |
| 58 |                          |                      |                                                                      |       |
| 59 |                          |                      |                                                                      |       |
| 60 |                          |                      |                                                                      |       |

1 None The STROBE checklist is distributed under the terms of the Creative Commons Attribution  
2 License CC-BY. This checklist can be completed online using <https://www.goodreports.org/>, a tool  
3 made by the [EQUATOR Network](#) in collaboration with [Penelope.ai](#)  
4  
5  
6  
7  
8  
9  
10  
11  
12  
13  
14  
15  
16  
17  
18  
19  
20  
21  
22  
23  
24  
25  
26  
27  
28  
29  
30  
31  
32  
33  
34  
35  
36  
37  
38  
39  
40  
41  
42  
43  
44  
45  
46  
47  
48  
49  
50  
51  
52  
53  
54  
55  
56  
57  
58  
59  
60

For peer review only

# BMJ Open

**Body mass index, proteinuria and total lymphocyte counts in predicting treatment responses among ART naïve individuals with HIV initiated on antiretroviral treatment in Dar es Salaam, Tanzania, 2019: a cohort study**

|                                 |                                                                                                                                                                                                                                                                                                                                                                                         |
|---------------------------------|-----------------------------------------------------------------------------------------------------------------------------------------------------------------------------------------------------------------------------------------------------------------------------------------------------------------------------------------------------------------------------------------|
| Journal:                        | <i>BMJ Open</i>                                                                                                                                                                                                                                                                                                                                                                         |
| Manuscript ID                   | bmjopen-2021-059193.R2                                                                                                                                                                                                                                                                                                                                                                  |
| Article Type:                   | Original research                                                                                                                                                                                                                                                                                                                                                                       |
| Date Submitted by the Author:   | 12-May-2022                                                                                                                                                                                                                                                                                                                                                                             |
| Complete List of Authors:       | Munseri, Patricia; Muhimbili University of Health and Allied Sciences School of Medicine,<br>Jassely, Lazaro; Muhimbili University of Health and Allied Sciences School of Medicine, Internal Medicine<br>Tumaini, Basil; Muhimbili University of Health and Allied Sciences, Internal Medicine<br>Hertzmark, Ellen; Harvard University T H Chan School of Public Health, Global Health |
| <b>Primary Subject Heading</b>: | HIV/AIDS                                                                                                                                                                                                                                                                                                                                                                                |
| Secondary Subject Heading:      | HIV/AIDS                                                                                                                                                                                                                                                                                                                                                                                |
| Keywords:                       | INTERNAL MEDICINE, INFECTIOUS DISEASES, HIV & AIDS < INFECTIOUS DISEASES                                                                                                                                                                                                                                                                                                                |
|                                 |                                                                                                                                                                                                                                                                                                                                                                                         |

SCHOLARONE™  
Manuscripts





I, the Submitting Author has the right to grant and does grant on behalf of all authors of the Work (as defined in the below author licence), an exclusive licence and/or a non-exclusive licence for contributions from authors who are: i) UK Crown employees; ii) where BMJ has agreed a CC-BY licence shall apply, and/or iii) in accordance with the terms applicable for US Federal Government officers or employees acting as part of their official duties; on a worldwide, perpetual, irrevocable, royalty-free basis to BMJ Publishing Group Ltd ("BMJ") its licensees and where the relevant Journal is co-owned by BMJ to the co-owners of the Journal, to publish the Work in this journal and any other BMJ products and to exploit all rights, as set out in our [licence](#).

The Submitting Author accepts and understands that any supply made under these terms is made by BMJ to the Submitting Author unless you are acting as an employee on behalf of your employer or a postgraduate student of an affiliated institution which is paying any applicable article publishing charge ("APC") for Open Access articles. Where the Submitting Author wishes to make the Work available on an Open Access basis (and intends to pay the relevant APC), the terms of reuse of such Open Access shall be governed by a Creative Commons licence – details of these licences and which [Creative Commons](#) licence will apply to this Work are set out in our licence referred to above.

Other than as permitted in any relevant BMJ Author's Self Archiving Policies, I confirm this Work has not been accepted for publication elsewhere, is not being considered for publication elsewhere and does not duplicate material already published. I confirm all authors consent to publication of this Work and authorise the granting of this licence.

1  
2  
3 **1 Body mass index, proteinuria and total lymphocyte counts in predicting treatment**  
4  
5 **2 responses among ART naïve individuals with HIV initiated on antiretroviral treatment in**  
6  
7 **3 Dar es Salaam, Tanzania, 2019: a cohort study**  
8  
9  
10  
11  
12  
13

14 5 Patricia Munseri<sup>1\*</sup>§, Lazaro Jassely<sup>1\*</sup>, Basil Tumaini<sup>1</sup>, Ellen Hertzmark<sup>2</sup>  
15  
16  
17 6  
18  
19

20 7 <sup>1</sup> Department of Internal Medicine, Muhimbili University of Health and Allied Sciences, Dar es  
21  
22 8 Salaam, Tanzania  
23  
24

25 9 <sup>2</sup> Department of Global Health and Population, Harvard University T H Chan School of Public  
26  
27 10 Health, Boston, MA  
28  
29

30  
31  
32  
33 12 § Corresponding author  
34  
35

36 13 Email: [patricia.munseri@gmail.com](mailto:patricia.munseri@gmail.com) (PM)  
37  
38  
39 14  
40  
41

42 15 \*Shared first Author  
43  
44  
45 16  
46  
47

48 17 Word count abstract: 294  
49  
50

51 18 Word count manuscript: 4122  
52  
53  
54  
55  
56  
57

1  
2  
3  
4  
5  
6  
7  
8  
9  
10  
11  
12  
13  
14  
15  
16  
17  
18  
19  
20  
21  
22  
23  
24  
25  
26  
27  
28  
29  
30  
31  
32  
33  
34  
35  
36  
37  
38  
39  
40  
41  
42  
43  
44  
45  
46  
47  
48  
49  
50  
51  
52  
53  
54  
55  
56  
57  
58  
59  
60

19 **Keywords:** monitoring ART treatment; HIV/AIDS; CD4 count; BMI in HIV; proteinuria in  
20 HIV; viral suppression

For peer review only

1  
2  
3 **Abstract**  
4  
5

6 **Objectives:** To explore the potential use of body mass index, proteinuria, and total lymphocyte  
7  
8  
9  
10  
11  
12  
13  
14  
15  
16  
17  
18  
19  
20  
21  
22  
23  
24  
25  
26  
27  
28  
29  
30  
31  
32  
33  
34  
35  
36  
37  
38  
39  
40  
41  
42  
43  
44  
45  
46  
47  
48  
49  
50  
51  
52  
53  
54  
55  
56  
57  
58  
59  
60

count changes in predicting immunological and virological response in individuals with HIV initiated on antiretroviral therapy (ART).

**Design:** Prospective cohort study.

**Setting:** Three urban HIV care and treatment centres (CTC) in Dar es Salaam.

**Participants:** Individuals with HIV initiating ART.

**Outcome measures:** HIV viral load  $\geq 1000$  copies/ml (viral non-suppression) at six months after ART initiation.

**Results:** Of 215 (out of 220 enrolled) participants who returned for evaluation at six months, 147 (66.8%) were female. At six months of follow-up, 89.4% (76/85) of participants with sustained weight gain were virally suppressed compared to 31.8% (7/22) with sustained loss,  $p < 0.001$ . In participants who were lymphopaenic at baseline, an increase to normal total lymphocyte counts at six months was associated with an increase in CD4 count compared to participants who remained lymphopaenic, 96.2% (50/52) vs. 54.8% (17/31),  $p < 0.001$ . At baseline, 50.0% (110/220) had proteinuria. In participants without proteinuria from baseline to six months, 89.8% (79/88) were virally suppressed compared to participants with proteinuria at baseline and/or three months, 85.6% (77/90), those with persistent proteinuria, 30.8% (8/26), and proteinuria at six months only, 45.5% (5/11),  $p < 0.001$ . In modified Poisson regression, the independent predictors other than CD4 cell counts for viral non-suppression at six months among individuals with HIV initiating on ART were BMI loss  $> 5\%$  from baseline to six months, {adjusted RR 2.73, 95% CI (1.36-5.47)},

1  
2  
3 43 lymphopaenia at six months, {adjusted RR = 4.54, 95% CI (2.19-9.39)}, and proteinuria at six  
4  
5 44 months {adjusted RR = 2.63, 95% CI (1.25-5.54)}.

6  
7  
8 45 **Conclusions:** Change in body mass index, total lymphocyte count, and presence of proteinuria can  
9  
10 46 monitor and predict ART response and may be particularly helpful in settings when CD4 counts  
11  
12  
13 47 and viral load monitoring are unavailable.

14  
15  
16 48

17  
18  
19  
20  
21  
22  
23  
24  
25  
26  
27  
28  
29  
30  
31  
32  
33  
34  
35  
36  
37  
38  
39  
40  
41  
42  
43  
44  
45  
46  
47  
48  
49  
50  
51  
52  
53  
54  
55  
56  
57

For peer review only

1  
2  
3 **49 Article Summary**  
4  
5

6 **50 Strengths and limitations of this study**  
7

- 8  
9 **51** ➤ We had complete data on 98% of the originally enrolled participants.  
10  
11 **52** ➤ In resource-constrained situations, when viral load and CD4 testing are not always easily  
12 available, models such as ours with locally determined easily computable prediction cut-offs  
13 **53** can be utilized by clinicians to make clinical decisions.  
14  
15 **54** ➤ Our findings require validation in a study with larger sample size.  
16  
17 **55** ➤ Local conditions and treatment standards may influence some of the patterns we observed,  
18  
19 **56** both in prevalence and in effect.  
20  
21  
22  
23  
24  
25  
26  
27  
28  
29  
30  
31  
32  
33  
34  
35  
36  
37  
38  
39  
40  
41  
42  
43  
44  
45  
46  
47  
48  
49  
50  
51  
52  
53  
54  
55  
56  
57  
58

## Introduction

In 2019 about 38 million people were living with HIV globally, with 1.7 million in Tanzania accounting for an estimated prevalence of 4.8% in the Tanzanian population aged 15-49 years [1]. Viral load testing is the recommended method for monitoring HIV treatment response [2]. However, viral load testing in resource-constrained settings is challenged by limited access, high costs, unavailability at district levels, and in areas where available, sometimes a shortage of reagents, compounded by challenges with equipment maintenance [3], as happened during the COVID-19 pandemic.

There is no doubt that viral load testing is effective in monitoring patient treatment adherence and HIV resistance, as per WHO guidelines. However, in resource-constrained areas that may not always be able to perform viral load testing in a timely manner, there is a need for readily available and routinely assessed objective measures that may predict early viral non-suppression or measures that may help with interim evaluation of patients suspected to have treatment failure who will thereafter need additional follow up with viral load testing. Individuals with HIV are routinely assessed for weight, height, renal function, and complete blood counts before initiation of combined antiretroviral treatment (ART) in resource constrained settings including Tanzania. These assessments are repeated at intervals of three months, six months and biannually after ART initiation. Adverse changes in such parameters from treatment initiation (baseline) or subsequently at follow-up visits provides useful information about treatment responses and may identify a targeted group of patients to be prioritized for viral load testing before a decision to switch the ART regimen.

Routine parameters such as body mass index, total lymphocyte counts, and protein in urine are easily available and can be evaluated in combination for HIV treatment monitoring. Weight loss

1  
2  
3 82 is one of the major manifestations of advanced HIV infection. Factors hypothesized to contribute  
4  
5 83 to weight loss include metabolic alterations, anorexia, malabsorptive disorders, hypogonadism,  
6  
7  
8 84 and excessive cytokine production [4]  
9

10  
11 85 Weight gain following ART initiation may reflect slowed resting energy expenditure resulting  
12  
13 86 from viral suppression and a decrease in HIV enteropathy [5]. Weight gain, especially among  
14  
15 87 individuals with low BMI, is associated with improved survival and decreased risk of clinical  
16  
17 88 failure [6]. ART responses depend on adherence [7], nutritional status at baseline [8], HIV subtype  
18  
19 89 [9], and ART combination regimen [10]. In Port Harcourt, Nigeria, among 318 participants with  
20  
21 90 HIV infection aged  $\geq 18$  years initiated on ART, almost 70% and 55% of participants gained at  
22  
23 91 least 1 kg weight in the first six months and one year of treatment, respectively [11]. Previous  
24  
25 92 studies in Tanzania have shown that a decrease in nutrition status within the first three months of  
26  
27 93 ART initiation was associated with mortality [12].  
28  
29  
30  
31

32 94 HIV-associated nephropathy (HIVAN) is the most common renal biopsy finding in individuals  
33  
34 95 with HIV with a prevalence ranging from 4.7 to 38% [13]. Proteinuria and elevated creatinine have  
35  
36 96 been associated with AIDS-defining illness and death [14]. Urine assessment for protein by  
37  
38 97 dipstick can detect renal disease and progression, especially as renal biopsy, an invasive procedure,  
39  
40 98 is not readily available in most resource-constrained settings.  
41  
42  
43

44 99 HIV is associated with progressive destruction of CD4+ T-helper lymphocytes responsible for the  
45  
46 100 profound immunodeficiency that underlies AIDS [15]. As CD4 cells are a subset of lymphocytes,  
47  
48 101 any significant change in CD4 cells will cause a parallel change in total lymphocyte counts [16].  
49  
50  
51  
52  
53  
54  
55  
56  
57



1  
2  
3 102 This study aimed at assessing the following routinely accessible parameters: body mass index,  
4  
5 103 proteinuria, and total lymphocyte counts (TLC), and their patterns of change in monitoring HIV  
6  
7  
8 104 treatment responses at six months following ART initiation.  
9  
10  
11  
12  
13  
14  
15  
16  
17  
18  
19  
20  
21  
22  
23  
24  
25  
26  
27  
28  
29  
30  
31  
32  
33  
34  
35  
36  
37  
38  
39  
40  
41  
42  
43  
44  
45  
46  
47  
48  
49  
50  
51  
52  
53  
54  
55  
56  
57

For peer review only

## 105 **Methods**

### 106 **Study design and population**

107 This cohort study was conducted in three urban care and treatment centres (CTC) in Temeke  
108 district, Dar es Salaam: Temeke regional referral hospital, Mbagala Rangi-tatu district hospital,  
109 and Mbagala Kizuiani dispensary between September 2018 and April 2019. The centres were  
110 chosen due to large numbers of ART naïve clients, amounting to 60 or more per clinic per month.  
111 The sites have an organized CTC and follow up plan for clients. Participants were included in the  
112 study if they were newly diagnosed with HIV and were ART naïve aged 18 years or older and  
113 were able to provide written informed consent. Participants were initiated on ART based on the  
114 Tanzanian National guidelines [17] with a default regimen of tenofovir, lamivudine and efavirenz  
115 unless contraindicated.

### 116 **Sample size estimation**

117 To determine the minimal detectable relative risks for the study variables, we considered two-  
118 sample tests of the expected highest risk category versus the expected lowest risk category. For  
119 the dichotomous potential risk factors, we assumed a total number of 215 subjects, split roughly  
120 as our actual data are split (with numbers rounded to the nearest 5 to mimic a pre-study power  
121 calculation). For BMI change we used 80 for the reference group (gain), 125 for stable, and 20 for  
122 the loss group. The minimum detectable risk ratios were 3.77 for decreased BMI, 2.56 for stable  
123 BMI, 2.94 for lymphopenia and for proteinuria, 2.47 for stage greater than 1, 2.47 for age of 40,  
124 years and above 2.59 (or  $< 0.11$ ) for female sex, 2.74 for secondary or higher education, 2.44 for  
125 unemployment and for never married.

126

## 127 **Data collection**

128 We used an interviewer-based structured tool to conduct face-to-face interviews to obtain socio-  
129 demographic and baseline characteristics (at treatment initiation) such as age, sex, occupation, the  
130 highest level of education attained, marital status, and clinically assessed the participant's WHO  
131 HIV clinical stage. A participant's baseline weight was measured using a SECA weighing scale  
132 recording to the nearest 0.5 kg and height using a wall stadiometer recording to the nearest 0.5 cm.  
133 Body mass index was then computed by dividing the weight in kg by the height in meters squared,  
134 the interpretation of which was adapted from WHO [18].

135 About 10ml of venous blood was collected aseptically from each participant; 5ml for CD4 cell  
136 counts, analysed using BD FACSCount™ (Becton Dickinson, USA) and 5ml for complete blood  
137 count to obtain the total lymphocyte counts, analysed by an auto-analyser (Cell DNY1800 from  
138 Abbott Diagnostics Division, USA). TLC was categorized as lymphopaenia ( $<1 \times 10^9/L$ ), normal  
139 lymphocyte ( $1 \times 10^9/L$  to  $4 \times 10^9/L$ ), and lymphocytosis ( $>4.0 \times 10^9/L$ ). We assessed for proteinuria  
140 by collecting about 15ml of a fresh urine sample from each participant into an empty, clean, dry  
141 container and tested using CYBOW™ strips (DFI Co. Ltd, Korea). Proteinuria was categorized as  
142 negative proteinuria (no proteinuria), trace or 1+ proteinuria (equivalent to 30 to 100 mg/dl), 2+  
143 proteinuria (equivalent to 100 to 300 mg/dl), 3+ proteinuria (equivalent to 300 to 1000 mg/dl), and  
144 4+ proteinuria (equivalent to greater than 1000 mg/dl).

145 At three and six months after ART initiation, a repeat assessment of participants was done for CD4  
146 cell counts, TLC, proteinuria, and weight. At six months, an additional 5ml of blood was collected  
147 from each study participant for viral load measurement using the Abbott RealTime HIV-1 assay.  
148 Participants were classified as virally suppressed at six months after ART initiation if their HIV  
149 viral load was  $<1000$  copies/ml, according to Tanzania HIV treatment guidelines. Levels and

1  
2  
3 150 changes in BMI, lymphocytes, and proteinuria were compared between participants who were HIV  
4  
5 151 suppressed and that of HIV not suppressed.  
6  
7

8 152 BMI was considered to have changed between one time point and another if it increased or  
9  
10 153 decreased by over 5%. BMI changes from ART initiation to six months were categorized into three  
11  
12 154 groups as (i) loss of more than 5%, (ii) stable (change between -5% and 5%, or (iii) gain of more  
13  
14 155 than 5%. The TLC were categorized as (i) lymphopaenia <  $1 \times 10^9$  cells/L, (ii) normal lymphocyte  
15  
16 156 count  $1-4 \times 10^9$  cells/L (iii) Lymphocytosis >  $4 \times 10^9$  cells/L. The TLC pattern change was  
17  
18 157 categorized as (i) lymphopaenic at 6 months, regardless of the status at baseline or three months;  
19  
20 158 (ii) increased from lymphopaenic to normal or higher; (iii) stayed normal or higher (no  
21  
22 159 lymphopaenia seen). Urinary protein patterns were categorized as (i) proteinuria at six months  
23  
24 160 regardless of baseline proteinuria status; (ii) proteinuria at baseline and/or third month but not six  
25  
26 161 months; and (iii) no proteinuria seen.  
27  
28  
29  
30  
31

### 32 162 **Patient and public involvement**

33  
34  
35 163 Patients or members of the public were not involved in the design, or conduct, or reporting, or  
36  
37 164 dissemination plans of the research.  
38  
39

### 40 165 **Statistical methods**

41  
42  
43 166 Data were analysed using IBM® SPSS® Statistics version 26, R, and SAS version 9.4 (Cary, NC).  
44  
45 167 Categorical variables such as age group, sex, marital status, level of education, occupation,  
46  
47 168 categories of BMI, CD4 count, proteinuria, TLC, BMI change, TLC change, and proteinuria  
48  
49 169 change were summarized as frequencies and proportions. Continuous variables such as age, BMI,  
50  
51 170 and CD4 count were summarized as means and standard deviations. When necessary, small groups  
52  
53  
54  
55  
56  
57

1  
2  
3 171 were combined for analysis. To determine the association between BMI, TLC or urine protein to  
4  
5 172 CD4 count, we used correlation.  
6  
7

8 173 To determine the relationships between individual predictors and viral non-suppression at six  
9  
10 174 months, we first used modified Poisson regression for univariable analysis with an assumption that  
11  
12 175 viral non suppression is a non-rare outcome (more than 10%), to determine which variables to  
13  
14 176 include in the multivariable model [19,20]. For multivariable prediction, all predictors in the  
15  
16 177 univariable model with a p-value of <0.2 and age, a known confounder, were entered into the  
17  
18 178 modified Poisson regression model. The results of the Poisson regression model were presented  
19  
20 179 as relative risk (RR) and 95% confidence interval (RR; 95% CI). To determine the test  
21  
22 180 characteristics (sensitivity, specificity, positive predictive value (PPV), negative predictive value  
23  
24 181 (NPV)) of a score based on the multivariable model, we used two cut-off levels, based on the first  
25  
26 182 quartile and median of the score among the non-suppressed. The score was the sum of the rounded  
27  
28 183 coefficients for the variables for which the confidence intervals did not include 1 in a model  
29  
30 184 containing only these variables. Since these all rounded to 1, this is equivalent to simply counting  
31  
32 185 the number of these characteristics.  
33  
34  
35  
36  
37  
38

39 186 Based on practices in low resourced clinics, communication with the patient and the decision to  
40  
41 187 change the ART regimen depends on the patient's virological status at six months. CD4 cell counts  
42  
43 188 depend on a blood sample collected at the six-month visit and are therefore unavailable for  
44  
45 189 immediate decision making. We, therefore, excluded all CD4 variables from the model and used  
46  
47 190 parameters available at the time of the six-month visit to predict viral non-suppression.  
48  
49  
50  
51  
52  
53  
54  
55  
56  
57

191

## Results

192 During the recruitment, 220 ART naïve individuals with HIV were initiated on ART and all were  
 193 enrolled in the study over a month; each participant was followed up for six months. Two  
 194 participants were lost to follow up at three months; two died before six months of follow up, and  
 195 one participant, a long-distance truck driver, was out of the country at the time of the 6-month  
 196 follow up. Therefore, our analysis data set includes the remaining 215 participants. Details of  
 197 enrolment are shown in Fig 1.

198

199

200 **Figure 1. Consort diagram.**

201

202

### 203 Baseline characteristics of study participants

204 Of the 215 participants analysed, the mean age (SD) was  $37.1 \pm 11.5$  years, 146 (68%) were female,  
 205 113 (53%) were never married, 45 (21%) had secondary education or higher, and 117 (54%) were  
 206 unemployed (Table 1). Most participants, 59.5%, had normal BMI, while 27% were overweight,  
 207 and 13% were underweight. Most participants, 113 (62%), were in WHO HIV clinical stage I, and  
 208 only eight (4%) were in stage IV, though 93 (43%) had CD4 counts of 350 cells/ml or below; 83  
 209 (39%) were lymphopaenic, and 111 (52%) had proteinuria at baseline.

210

211 **Table 1. Characteristics of 215 study participants at ART initiation, Dar es Salaam,**  
 212 **Tanzania, 2019.**

| Characteristic | n (%) | Mean $\pm$ SD   |
|----------------|-------|-----------------|
| Age (years)    |       | $37.1 \pm 11.5$ |

|    |                                                   |              |            |
|----|---------------------------------------------------|--------------|------------|
| 1  |                                                   |              |            |
| 2  |                                                   |              |            |
| 3  | <b>Age group (years)</b>                          |              |            |
| 4  | 18 – 30                                           | 69 (32.1%)   |            |
| 5  | 31 – 40                                           | 72 (33.5%)   |            |
| 6  | 41 – 50                                           | 45 (20.9%)   |            |
| 7  | >51                                               | 29 (13.5%)   |            |
| 8  |                                                   |              |            |
| 9  |                                                   |              |            |
| 10 | <b>Sex</b>                                        |              |            |
| 11 | Female                                            | 146 (67.9%)  |            |
| 12 | Male                                              | 69 (32.1 %)  |            |
| 13 |                                                   |              |            |
| 14 | <b>Level of education</b>                         |              |            |
| 15 | No education                                      | 10 (4.7%)    |            |
| 16 | Primary education                                 | 160 (74.4%)  |            |
| 17 | Secondary education                               | 42 (19.5%)   |            |
| 18 | Higher education                                  | 3 (1.4%)     |            |
| 19 |                                                   |              |            |
| 20 | <b>Employment Status</b>                          |              |            |
| 21 | Not employed                                      | 117 (54.4%)  |            |
| 22 | Employed                                          | 98 (45.6%)   |            |
| 23 |                                                   |              |            |
| 24 | <b>Marital status</b>                             |              |            |
| 25 | Ever married                                      | 102 (47.4%)  |            |
| 26 | Never married                                     | 113 (52.6%)  |            |
| 27 |                                                   |              |            |
| 28 | <b>Body mass index (kg/m<sup>2</sup>)</b>         |              | 22.9 ± 4.3 |
| 29 | Underweight                                       | 28 (13.0%)   |            |
| 30 | Normal weight                                     | 128 (59.5%)  |            |
| 31 | Overweight/Obese                                  | 59 (27.4%)   |            |
| 32 |                                                   |              |            |
| 33 | <b>WHO HIV clinical stages</b>                    |              |            |
| 34 | Stage I                                           | 133 (61.9%)  |            |
| 35 | Stage II                                          | 30 (14.0%)   |            |
| 36 | Stage III                                         | 44 (20.5%)   |            |
| 37 | Stage IV                                          | 8 (3.7%)     |            |
| 38 |                                                   |              |            |
| 39 | <b>CD4 cell counts (cells/mm<sup>3</sup>)</b>     |              | 401 ± 253  |
| 40 | <200                                              | 55 (25.6%)   |            |
| 41 | 200-350                                           | 38 (17.7%)   |            |
| 42 | 351-500                                           | 39 (18.1%)   |            |
| 43 | >500                                              | 83 (38.6%)   |            |
| 44 |                                                   |              |            |
| 45 | <b>Lymphocyte counts (x10<sup>9</sup>cells/L)</b> |              | 1.6 ± 1.2  |
| 46 | <1                                                | 83 (38.6%)   |            |
| 47 | 1-4                                               | 126 (58.6%)  |            |
| 48 | >4                                                | 6 (2.8%)     |            |
| 49 |                                                   |              |            |
| 50 | <b>Proteinuria</b>                                |              |            |
| 51 | No proteinuria                                    | 104 (48.4 %) |            |
| 52 | 1+ (30 – 100 mg/dl)                               | 80 (37.2%)   |            |
| 53 |                                                   |              |            |
| 54 |                                                   |              |            |
| 55 |                                                   |              |            |
| 56 |                                                   |              |            |
| 57 |                                                   |              |            |
| 58 |                                                   |              |            |
| 59 |                                                   |              |            |
| 60 |                                                   |              |            |

|                       |            |
|-----------------------|------------|
| 2+ (100 – 300 mg/dl)  | 27 (12.6%) |
| 3+ (300 – 1000 mg/dl) | 4 (1.9%)   |

213 CD4: Cluster of differentiation 4; HIV: Human Immunodeficiency Virus; SD: Standard Deviation

214

215

216 **Table 2. Predictors of HIV viral load non-suppression at six months among 215 ART naïve**  
 217 **participants initiating ART, Dar es Salaam, Tanzania, 2019.**

| Variable                             | Total | HIV non-suppression at six months n (%) | RR (95% CI)       | Adjusted RR (95% CI) |
|--------------------------------------|-------|-----------------------------------------|-------------------|----------------------|
| <b>Age (years)</b>                   |       |                                         |                   |                      |
| < 40                                 | 136   | 26 (19%)                                | 1                 | 1                    |
| ≥40                                  | 79    | 20 (25%)                                | 1.32 (0.79-2.21)  | 1.43 (0.91-2.26)     |
| <b>Sex</b>                           |       |                                         |                   |                      |
| Female                               | 146   | 35 (24%)                                | 1.50 (0.81-2.78)  | 1.27 (0.73-2.20)     |
| Male                                 | 69    | 11 (16%)                                | 1                 | 1                    |
| <b>Level of Education</b>            |       |                                         |                   |                      |
| Primary or less                      | 170   | 37 (22%)                                | 1                 |                      |
| Secondary or higher                  | 45    | 9 (20%)                                 | 0.92 (0.48-1.76)  |                      |
| <b>Employment Status</b>             |       |                                         |                   |                      |
| Not employed                         | 117   | 24 (21%)                                | 1                 |                      |
| Employed                             | 98    | 22 (22%)                                | 1.09 (0.66-1.83)  |                      |
| <b>Marital status</b>                |       |                                         |                   |                      |
| Never married                        | 113   | 19 (17%)                                | 1                 | 1                    |
| Ever married                         | 102   | 27 (26%)                                | 1.57 (0.93-2.66)  | 1.34 (0.84-2.16)     |
| <b>Body mass index</b>               |       |                                         |                   |                      |
| Change from baseline to three months |       |                                         |                   |                      |
| Loss >5%                             | 28    | 17 (61%)                                | 4.93 (2.41-10.09) |                      |
| Stable                               | 122   | 21 (17%)                                | 1.40 (0.66-2.99)  |                      |
| Gain >5 %                            | 65    | 8 (12%)                                 | 1                 |                      |
| Change from baseline to six months   |       |                                         |                   |                      |
| Loss >5%                             | 20    | 16 (80%)                                | 7.11 (3.69-13.69) | 2.73 (1.36-5.47)     |
| Stable                               | 115   | 21 (18%)                                | 1.62 (0.78-3.36)  | 1.87 (0.95-3.68)     |
| Gain >5 %                            | 80    | 9 (11%)                                 | 1                 | 1                    |
| <b>HIV clinical stage</b>            |       |                                         |                   |                      |
| I                                    | 133   | 24 (18%)                                | 1                 | 1                    |
| II                                   | 30    | 8 (27%)                                 | 1.48 (0.74-2.97)  | 1.14 (0.63-2.08)     |
| III and IV                           | 52    | 14 (27%)                                | 1.49 (0.84-2.66)  | 0.82 (0.51-1.31)     |



|                                                                   |     |          |                   |                  |
|-------------------------------------------------------------------|-----|----------|-------------------|------------------|
| <b>Total lymphocyte count change from baseline to six months</b>  |     |          |                   |                  |
| Ended lymphopaenic                                                | 37  | 27 (73%) | 7.66 (4.32-13.60) | 4.54 (2.19-9.39) |
| Lymphopaenic to normal                                            | 52  | 7 (13%)  | 1.41 (0.59-3.40)  | 1.59 (0.66-3.80) |
| Lymphopaenia not seen                                             | 126 | 12 (10%) | 1                 | 1                |
| <b>Pattern of change in proteinuria</b>                           |     |          |                   |                  |
| Proteinuria at 6 months regardless of baseline proteinuria status | 37  | 24 (65%) | 6.73 (3.34-13.58) | 2.63 (1.25-5.54) |
| Proteinuria at baseline and/or 3 months but not 6 months          | 95  | 14 (15%) | 1.53 (0.67-3.47)  | 1.26 (0.62-2.57) |
| No proteinuria seen                                               | 83  | 8 (10%)  | 1                 | 1                |

218 CI: confidence interval; RR: relative risk; ART: antiretroviral therapy.

219 Univariable and multivariable analysis by modified Poisson regression.

220

221 BMI and CD4 count were directly correlated at baseline, 3, and 6 months. TLC and CD4 count  
 222 were moderately positively correlated; while urine protein and CD4 count were inversely  
 223 correlated (see Supplementary Figures 1, 2, and 3 in Additional file 1).

224

225 **Predictors of viral non-suppression at six months among individuals with HIV initiated on**

226 **ART**

227 Only 46 participants (21%) were not virally suppressed at six months. The strongest clinical  
 228 predictors of viral non-suppression in the multivariable analysis were lymphopaenia at six months  
 229 irrespective of baseline lymphocyte status, with 73% of participants with lymphopaenia at six  
 230 months not being suppressed. After adjusting for other factors, lymphopaenia at six months was  
 231 associated with HIV non-suppression {RR = 4.54, 95% CI (2.19-9.39)}. Among participants with

1  
2  
3 232 a drop in body mass index at six months of 5% or more from baseline, 80% were non-suppressed  
4  
5 233 {RR = 2.73; 95% CI (1.36-5.47)}. In an alternative analysis, we considered BMI changes of 10%,  
6  
7 234 but only 9 of the non-suppressed participants (20%) had such large decreases. The risk of HIV  
8  
9 235 non-suppression at six months was higher among participants with proteinuria at six months {RR  
10  
11 236 = 2.63; 95% CI (1.25-5.54)}, Table 2. The area under the Receiver Operating Characteristic (ROC)  
12  
13 237 curve for the multivariable model was 0.895 (Fig 2). Baseline HIV stage was not related to HIV  
14  
15 238 non-suppression at six months, {adjusted RR = 1.14, 95% CI (0.63-2.08)} for baseline WHO HIV  
16  
17 239 clinical stage II and {adjusted RR = 0.82, 95% CI (0.51-1.31)} for advanced baseline WHO HIV  
18  
19 240 clinical stages (III and IV)}.

20  
21  
22  
23  
24 241 Using the rounded coefficients of the three variables in a model containing only these variables,  
25  
26 242 which all rounded to 1, we made a “prediction score” with values 0 (n=154, of which 10 were non-  
27  
28 243 suppressed), 1 (n=36, 13 non-suppressed), 2 (n=17, 15 non-suppressed), and 3 (n=8, all non-  
29  
30 244 suppressed). The median value of this score among the non-suppressed was 1.5 and the first  
31  
32 245 quartile value was 1. Thus, having any 2 of the risk factors would be a conservative predictor of  
33  
34 246 non-suppression, and having any one would be less conservative.  
35  
36  
37  
38  
39  
40  
41  
42  
43  
44  
45  
46  
47  
48  
49  
50  
51  
52  
53  
54  
55  
56  
57

1  
2  
3 247 **Figure 2. Receiver Operating Characteristic curve assessing a model using BMI decrease,**  
4  
5 248 **proteinuria, and total lymphocyte counts to predict viral non-suppression among ART naïve**  
6  
7 249 **individuals with HIV initiated on ART in Dar es Salaam, Tanzania, 2019**  
8  
9

10  
11 250

12  
13  
14 251

15  
16  
17 252 Using the median score among the non-suppressed as a cut-off (equivalent to having any two of  
18  
19 253 the components), the sensitivity predicting non-suppression was 0.50, and the specificity was 0.99.

20  
21 254 Only 12% of the study population met this criterion. When we lowered the cut-off scores to the  
22  
23 255 first quartile value among the non-suppressed (i.e. any one of the components), the sensitivity was  
24  
25 256 0.78 and the specificity was 0.85, with 28% of the study population meeting this criterion.  
26  
27  
28

29  
30 257  
31  
32  
33  
34  
35  
36  
37  
38  
39  
40  
41  
42  
43  
44  
45  
46  
47  
48  
49  
50  
51  
52  
53  
54  
55  
56  
57  
58  
59  
60

## 258 Discussion

259 This cohort study recruited ART naïve individuals with HIV from three care and treatment centres  
260 in Dar es Salaam, Tanzania, with the aim of assessing the utility of total lymphocyte count, body  
261 mass index, and proteinuria in predicting ART responses at six months. The intention of this study  
262 is not to replace CD4 cell count testing and HIV viral load monitoring but to assist clinicians when  
263 faced with decision making if these standard monitoring parameters are not easily accessible.  
264 Contrary to earlier studies done when the ART medications were not as effective as the current  
265 ones [12], patient characteristics at ART initiation did not affect the probability of viral non-  
266 suppression at six months, whereas patterns of change and the patient's status at 6 months were  
267 highly predictive.

268 Baseline WHO HIV clinical stage did not help predict HIV non-suppression at six months,  
269 possibly because under the current "Test and Treat" strategy [21], most individuals initiating ART  
270 are in WHO HIV clinical stages I and II (76% of our sample). Current therapy is highly effective  
271 except for a few patients whose disease is so advanced that they die before the medication can  
272 improve their immune status (2 patients in this study). Symptomatic individuals with advanced  
273 HIV will likely adhere to treatment to alleviate their symptoms. Perhaps patients with advanced  
274 disease fear death and therefore are motivated to adhere to ART, with eventual viral suppression.  
275 Advanced HIV disease has been shown to be linked with ART adherence [22]. Some studies,  
276 however, indicate that early HIV stages are linked with high ART adherence and viral suppression  
277 [23].

278 Lymphopaenia at six months, a decrease in body mass index of 5% or more from baseline, and  
279 proteinuria predicted HIV non-suppression at six months. Lymphopaenia at six months was the  
280 strongest predictor for HIV non-suppression at six months. Lymphopaenia at six months predicted

1  
2  
3 281 HIV non-suppression irrespective of a participant's lymphocyte count (normal or low) before ART  
4  
5 282 initiation. CD4 cells are a subset of lymphocytes and therefore lymphopaenia could be indicative  
6  
7 283 of a decline in CD4 cells, as a result of high HIV replication with high viral load signifying viral  
8  
9 284 non-suppression with consequent CD4 cell destruction. Lymphopaenia was significantly  
10  
11 285 associated with CD4 <500 cells/mm<sup>3</sup> at all time points. In this study, an increase in total  
12  
13 286 lymphocyte cell count from lymphopaenia to normal lymphocyte counts from baseline to six  
14  
15 287 months was significantly associated with an increase in CD4 cell count (Additional file 1). Total  
16  
17 288 lymphocyte count is sensitive and specific in predicting CD4 cell counts [16,24] though there have  
18  
19 289 been contradictory reports [25]. The assessment of total lymphocyte counts among patients on  
20  
21 290 ART, therefore, could serve as an alternative, especially in settings with limited availability of  
22  
23 291 CD4 cell count measurement. A drop in total lymphocyte count in such a setting can alert a  
24  
25 292 clinician to the likelihood of immunological failure. A drop in lymphocytes could also signal the  
26  
27 293 possibility of immunological non responders, who will need primary and secondary prophylaxis  
28  
29 294 for opportunistic infection.

30  
31 295 Weight loss with consequent BMI drop of 5% or more at six months while on ART from weight  
32  
33 296 prior to ART initiation, predicts HIV non-suppression, though HIV non-suppression was not  
34  
35 297 associated with being underweight prior to ART initiation, perhaps because of the low prevalence  
36  
37 298 of underweight leading to low power. In this study, sustained weight gain was significantly  
38  
39 299 associated with viral suppression and sustained weight loss was associated with viral non-  
40  
41 300 suppression at six months of ART. An increase in weight and hence BMI may be a sign of immune  
42  
43 301 status improvement signalling a return to health [26,27] and improved survival [28], while a  
44  
45 302 decrease in weight and hence BMI may be a sign of HIV progression or decline in CD4 cell counts  
46  
47 303 [5,11,29]. Weight loss may be due to HIV itself, opportunistic infections, or HIV-associated

1  
2  
3 304 tumours. Failure to gain weight has been associated with efavirenz toxicity over time as was  
4  
5 305 observed in a study in South Africa [30]. Weight loss in both ART naïve and exposed patients has  
6  
7 306 been associated with increased morbidity and mortality [31,32]. A study in England observed that  
8  
9 307 each log<sub>10</sub> increase in HIV viral load was associated with a 0.92 kg decrease in body weight.  
10  
11 308 However, a decrease in viral load was not significantly associated with weight gain, contrary to  
12  
13 309 our study [33]. Since weight changes correlate with the virological response, losing weight should  
14  
15 310 be viewed as an alarming sign of HIV viral non suppression from any cause. Monitoring of weight  
16  
17 311 and body mass index prior to ART initiation and during follow up is a valuable inexpensive way  
18  
19 312 of identifying individuals with possible viral non suppression. In an alternative analysis, we  
20  
21 313 considered BMI changes of 10%, but only 9 of the non-suppressed participants (20%) had such  
22  
23 314 large decreases, making the 10% decrease not useful as a cut-off in our situation.  
24  
25  
26  
27  
28

29 315 Half of the ART-naïve study participants had proteinuria, similar to a report from Zimbabwe [34].  
30  
31 316 The presence of proteinuria was associated with HIV non-suppression. Proteinuria at six months  
32  
33 317 was a strong predictor of HIV non-suppression. Proteinuria in individuals with HIV is attributed  
34  
35 318 to a direct effect of HIV on the glomerular and tubular epithelial cells with the progression of HIV  
36  
37 319 disease to AIDS, nephrotoxicity from ART, the progression of chronic kidney disease and death  
38  
39 320 [14,35] The higher the viral load, the greater the damage to the kidney [36]. We observed a  
40  
41 321 significant proportion of participants with proteinuria of 2+ or above in WHO HIV clinical stage  
42  
43 322 IV. This underscores the fact that, as HIV disease advances, the greater the damage to the kidneys  
44  
45 323 as evidenced by increasing proteinuria. Therefore, routine screening for renal disease may serve  
46  
47 324 not only as a follow-up of renal disease progression but also for HIV treatment response  
48  
49 325 monitoring.  
50  
51  
52  
53  
54  
55  
56  
57

1  
2  
3 326 The presence of proteinuria, lymphopaenia, and a drop in BMI of 5% are relatively simple  
4  
5 327 parameters to monitor among people living with HIV on ART especially in a setting where viral  
6  
7 328 load monitoring is a challenge. The presence of any of these parameters should alert a clinician on  
8  
9  
10 329 the possibility of viral non-response and review adherence issues including individualized  
11  
12 330 enhanced adherence counselling and subsequent treatment options.

13  
14  
15 331 Our findings require validation in a study with a larger sample size. Our small sample may have  
16  
17 332 constrained some predictors of viral non-suppression. Similar studies conducted in different  
18  
19 333 locations are also needed since local conditions and treatment standards may influence some  
20  
21 334 observed patterns, both in prevalence and effect. Furthermore, use of new antiviral drugs and  
22  
23 335 changes in patient characteristics at presentation may change our estimates, and possibly the  
24  
25 336 important predictor variables. We recommend further studies with extended follow up of patients  
26  
27 337 beyond six months to monitor further change in lymphopaenia, proteinuria and drop in BMI of 5%  
28  
29 338 or more especially for individuals maintained on the same regimen after enhanced adherence  
30  
31 339 counselling. We recommend further studies to examine the relationship between virological  
32  
33 340 response and anaemia as well as opportunistic infections and AIDS associated malignancies  
34  
35 341 especially now that ART is initiated early.

36  
37  
38 342 One strength of our study is the cohort design with complete follow up data at three and six months  
39  
40  
41 343 for 98% of the enrolled participants. Although our scoring system is crude, it is easy to compute  
42  
43 344 and is likely to be valid for a wide variety of situations, whereas a score based on more precise  
44  
45 345 computations would at best work only in our location.

46  
47  
48  
49  
50  
51 346

52  
53  
54 347 **Conclusion**

1  
2  
3 348 A drop in BMI by more than 5%, persistent lymphopaenia or decrease in total lymphocyte count  
4  
5 349 to lymphopaenia, and proteinuria at six months are associated with HIV non-suppression at 6  
6  
7  
8 350 months after ART initiation. Scores based on these parameters are easy to use and can serve as  
9  
10 351 alternatives to CD4 cell counts and viral load assessment in facilities with scarcity.  
11  
12

### 13 352 **List of abbreviations**

14  
15  
16 353 AIDS: Acquired immunodeficiency syndrome  
17

18  
19 354 ART: Antiretroviral therapy  
20

21  
22 355 BMI: Body mass index  
23

24  
25 356 CD4: Cluster of differentiation 4  
26

27  
28 357 HIV: Human immunodeficiency virus  
29

30  
31 358 TLC: Total lymphocyte counts  
32

33  
34 359 WHO: World Health Organization  
35

36  
37 360  
38

39  
40 361  
41

### 42 362 **Acknowledgements**

43  
44  
45 363 We are grateful to the participants for their willingness to take part in this study and to the health  
46  
47 364 workers from Temeke regional referral hospital, Mbagala Rangi-tatu district hospital, and  
48  
49 365 Mbagala Kizuiani dispensary for their assistance in participant recruitment and data collection.  
50  
51  
52

### 53 366 **Author Contributions**

54  
55  
56  
57



1  
2  
3 367 Study design: LJ and PM; data collection: LJ and PM; Data analysis and interpretation: LJ, PM,  
4  
5 368 BT and EH; Manuscript writing: LJ, PM, BT and EH. All the authors gave final approval of the  
6  
7  
8 369 manuscript.  
9

10  
11 370

12  
13  
14 371 **Funding**

15  
16  
17 372 This research received no specific grant from any funding agency in the public, commercial or  
18  
19 373 not-for-profit sectors.  
20

21  
22 374 **Competing interests**

23  
24  
25 375 None declared.  
26

27  
28 376 **Patient consent for publication**

29  
30  
31 377 Not applicable.  
32

33  
34 378 **Ethics approval**

35  
36  
37 379 Ethical approval was obtained from the Research and Publications Committee of Muhimbili  
38  
39 380 University of Health and Allied Sciences (Ref. No. DA.287/298/01A). Permission to conduct the  
40  
41 381 study was obtained from Temeke Municipal Hospital administration. Participants were enrolled  
42  
43 382 after providing written informed consent. The confidentiality of patient information was ensured.  
44  
45  
46 383 Participants without viral suppression at the 6<sup>th</sup> month of follow up were managed according to  
47  
48 384 Tanzania National Guidelines for management of HIV and AIDS.  
49

50  
51 385 **Data availability statement**  
52  
53  
54  
55  
56  
57

1  
2  
3 386 The dataset analysed during the current study is available upon reasonable request to the  
4  
5 387 corresponding author.  
6  
7

### 8 388 **ORCID iDs**

9  
10  
11 389 Basil Tumaini: <https://orcid.org/0000-0002-2894-1684>

12  
13 390 Ellen Hertzmark: <https://orcid.org/0000-0003-0148-2761>

### 14 391 **Ethics Statement**

15  
16 392 Muhimbili University of Health and Allied Sciences Institutional Review Board with reference  
17  
18 393 number DA287/298/01A/  
19  
20  
21  
22

23 394

### 24 395 **References**

- 25  
26  
27  
28 396 1. UNAIDS. UNAIDS data 2020 | UNAIDS [Internet]. 2020 [cited 2020 Aug 19].  
29 397 <https://www.unaids.org/en/resources/documents/2020/un aids-data>  
30  
31  
32 398 2. World Health Organization. Consolidated guidelines on the use of antiretroviral drugs for  
33 399 treating and preventing HIV infection: recommendations for a public health approach.  
34 400 World Health Organization; 2016.  
35  
36 401 [https://apps.who.int/iris/bitstream/handle/10665/208825/9789241549684\\_eng.pdf](https://apps.who.int/iris/bitstream/handle/10665/208825/9789241549684_eng.pdf)  
37  
38 402 3. Roberts T, Bygrave H, Fajardo E, Ford N. Challenges and opportunities for the  
39 403 implementation of virological testing in resource-limited settings. *Journal of the*  
40 404 *International AIDS Society*. 2012;15(2):17324. <https://doi.org/10.7448/IAS.15.2.17324>  
41 405 PMID: 23078767  
42  
43  
44 406 4. Sepkowitz KA. AIDS - the first 20 years. *New England Journal of Medicine*.  
45 407 2001;344(23):1764-72. <https://www.nejm.org/doi/full/10.1056/NEJM200106073442306>  
46 408 PMID: 11396444  
47  
48  
49 409 5. Mangili A, Murman DH, Zampini AM, Wanke CA, Mayer KH. Nutrition and HIV  
50 410 infection: review of weight loss and wasting in the era of highly active antiretroviral  
51  
52  
53  
54  
55  
56  
57

- 1  
2  
3 411 therapy from the nutrition for healthy living cohort. *Clinical Infectious Diseases*.  
4 412 2006;42(6):836-42. <https://doi.org/10.1086/500398> PMID: 16477562  
5  
6  
7 413 6. Koethe JR, Lukusa A, Giganti MJ, Chi BH, Nyirenda CK, Limbada MI, et al. Association  
8 414 between weight gain and clinical outcomes among malnourished adults initiating  
9 415 antiretroviral therapy in Lusaka, Zambia. *Journal of Acquired Immune Deficiency*  
10 416 *Syndromes*. 2010;53(4):507-13.  
11 417 [https://journals.lww.com/jaids/Fulltext/2010/04010/Association\\_Between\\_Weight\\_Gain\\_](https://journals.lww.com/jaids/Fulltext/2010/04010/Association_Between_Weight_Gain_and_Clinical.12.aspx)  
12 418 [and\\_Clinical.12.aspx](https://journals.lww.com/jaids/Fulltext/2010/04010/Association_Between_Weight_Gain_and_Clinical.12.aspx) PMID: 19730111  
13  
14 419 7. Mannheimer S, Friedland G, Matts J, Child C, Chesney M. The consistency of adherence  
15 420 to antiretroviral therapy predicts biologic outcomes for Human Immunodeficiency Virus -  
16 421 infected persons in clinical trials. *Clinical Infectious Diseases*. 2002;34(8):1115-21.  
17 422 <https://doi.org/10.1086/339074> PMID: 11915001  
18  
19 423 8. Paton NI, Sangeetha S, Earnest A, Bellamy R. The impact of malnutrition on survival and  
20 424 the CD4 count response in HIV-infected patients starting antiretroviral therapy. *HIV*  
21 425 *medicine*. 2006;7(5):323-30. <https://doi.org/10.1111/j.1468-1293.2006.00383.x> PMID:  
22 426 16945078  
23  
24 427 9. Wittkop L, Arsandaux J, Trevino A, Schim van der Loeff M, Anderson J, van Sighem A,  
25 428 et al. CD4 cell count response to first-line combination ART in HIV-2+ patients compared  
26 429 with HIV-1+ patients: a multinational, multicohort European study. *Journal of*  
27 430 *Antimicrobial Chemotherapy*. 2017;72(10):2869-78. <https://doi.org/10.1093/jac/dkx210>  
28 431 PMID: 29091198  
29  
30 432 10. Kanya MR, Mayanja-Kizza H, Kambugu A, Bakeera-Kitaka S, Semitala F, Mwebaze-  
31 433 Songa P, et al. Predictors of long-term viral failure among Ugandan children and adults  
32 434 treated with antiretroviral therapy. *Journal of Acquired Immune Deficiency Syndromes*.  
33 435 2007;46(2):187-93. PMID: 17693883  
34  
35 436 11. Olaleye AO, Owhonda G, Daramola O, Adejo I, Olayiwola H, Inyang JI, et al. Factors  
36 437 associated with weight gain among adult patients initiating antiretroviral therapy in Port  
37 438 Harcourt, Nigeria: a retrospective cohort study. *Infectious Diseases*. 2017;49(8):635-8.  
38 439 <https://doi.org/10.1080/23744235.2017.1306102> PMID: 28335659  
39  
40  
41  
42  
43  
44  
45  
46  
47  
48  
49  
50  
51  
52  
53  
54  
55  
56  
57  
58  
59  
60

- 1  
2  
3 440 12. Liu E, Spiegelman D, Semu H, Hawkins C, Chalamilla G, Aveika A, et al. Nutritional  
4 441 status and mortality among HIV-infected patients receiving antiretroviral therapy in  
5 442 Tanzania. *Journal of Infectious Diseases*. 2011;204(2):282-90.  
6  
7 443 <https://doi.org/10.1093/infdis/jir246> PMID: 21673040  
8  
9  
10  
11 444 13. Husain NE, Ahmed MH, Almobarak AO, Noor SK, Elmadhoun WM, Awadalla H, et al.  
12 445 HIV-associated nephropathy in Africa: pathology, clinical presentation and strategy for  
13 446 prevention. *Journal of Clinical Medicine Research*. 2018;10(1):1-8.  
14  
15 447 <https://doi.org/10.14740/jocmr3235w> PMID: 29238427  
16  
17  
18 448 14. Szczech LA, Hoover DR, Feldman JG, Cohen MH, Gange SJ, Goozé L, et al. Association  
19 449 between renal disease and outcomes among HIV-infected women receiving or not  
20 450 receiving antiretroviral therapy. *Clinical Infectious Diseases*. 2004;39(8):1199-206.  
21  
22 451 <https://doi.org/10.1086/424013> PMID: 15486845  
23  
24  
25  
26 452 15. Imlach S, McBreen S, Shirafuji T, Leen C, Bell JE, Simmonds P. Activated peripheral  
27 453 CD8 lymphocytes express CD4 in vivo and are targets for infection by Human  
28 454 Immunodeficiency Virus Type 1. *Journal of Virology*. 2001;75(23):11555-64.  
29  
30 455 <https://doi.org/10.1128/JVI.75.23.11555-11564.2001> PMID: 11689637  
31  
32  
33  
34 456 16. Obirikorang C, Quaye L, Acheampong I. Total lymphocyte count as a surrogate marker  
35 457 for CD4 count in resource-limited settings. *BMC Infectious Diseases*. 2012;12:128.  
36  
37 458 <https://doi.org/10.1186/1471-2334-12-128> PMID: 22676809  
38  
39  
40 459 17. The United Republic of Tanzania; Ministry of Health, Community Development, Gender,  
41 460 Elderly and Children; National AIDS Control Programme. National guidelines for the  
42 461 management of HIV and AIDS. 6th Ed, 2017. Available from:  
43  
44 462 [https://www.differentiatedservicedelivery.org/Portals/0/adam/Content/NqQGryocrU2RTj5](https://www.differentiatedservicedelivery.org/Portals/0/adam/Content/NqQGryocrU2RTj58iR37uA/File/Tanzania_NATIONAL_GUIDELINES_FOR_MANAGEMENT_OF_HIV)  
45 463 [8iR37uA/File/Tanzania\\_NATIONAL GUIDELINES FOR MANAGEMENT OF HIV](https://www.differentiatedservicedelivery.org/Portals/0/adam/Content/NqQGryocrU2RTj58iR37uA/File/Tanzania_NATIONAL_GUIDELINES_FOR_MANAGEMENT_OF_HIV)  
46 464 [AND AIDS 6TH EDITION 2017.pdf](https://www.differentiatedservicedelivery.org/Portals/0/adam/Content/NqQGryocrU2RTj58iR37uA/File/Tanzania_NATIONAL_GUIDELINES_FOR_MANAGEMENT_OF_HIV)  
47  
48  
49  
50 465 18. World Health Organization. Obesity: preventing and managing the global epidemic. WHO  
51 466 Technical Report Series. 2000(894).  
52  
53 467 [https://www.who.int/nutrition/publications/obesity/WHO\\_TRS\\_894/en/](https://www.who.int/nutrition/publications/obesity/WHO_TRS_894/en/)  
54  
55  
56  
57  
58  
59  
60

- 1  
2  
3 468 [https://www.who.int/nutrition/publications/obesity/WHO\\_TRS\\_894/en/](https://www.who.int/nutrition/publications/obesity/WHO_TRS_894/en/)  
4  
5  
6 469 19. Spiegelman D, Hertzmark E. Easy SAS calculations for risk or prevalence ratios and  
7  
8 470 differences. *American Journal of Epidemiology*. 2005; 162(3):199-200.  
9 471 <https://doi.org/10.1093/aje/kwi188> PMID: 15987728  
10  
11 472 20. Dwivedi AK, Mallawaarachchi I, Lee S, Tarwater P. Methods for estimating relative risk  
12  
13 473 in studies of common binary outcomes. *Journal of Applied Statistics*. 2014; 41(3):484-  
14  
15 474 500. <https://doi.org/10.1080/02664763.2013.840772>  
16  
17 475 21. WHO. The use of antiretroviral drugs for treating and preventing HIV infection guidelines  
18  
19 476 HIV/AIDS Programme. 2016 [cited 2021 Jan 19].  
20  
21 477 [http://apps.who.int/iris/bitstream/10665/85322/1/WHO\\_HIV\\_2013.7\\_eng.pdf](http://apps.who.int/iris/bitstream/10665/85322/1/WHO_HIV_2013.7_eng.pdf)  
22  
23 478 22. Biressaw S, Abegaz WE, Abebe M, Taye WA, Belay M. Adherence to Antiretroviral  
24  
25 479 Therapy and associated factors among HIV infected children in Ethiopia: Unannounced  
26  
27 480 home-based pill count versus caregivers' report. *BMC Pediatrics*. 2013;13:132.  
28  
29 481 <https://doi.org/10.1186/1471-2431-13-132> PMID: 24229394  
30  
31 482 23. Haberer JE, Bwana BM, Orrell C, Asiimwe S, Amanyire G, Musinguzi N, et al. ART  
32  
33 483 adherence and viral suppression are high among most non-pregnant individuals with  
34  
35 484 early-stage, asymptomatic HIV infection: an observational study from Uganda and South  
36  
37 485 Africa. *Journal of the International AIDS Society*. 2019;22(2):e25232.  
38  
39 486 <https://doi.org/10.1002/jia2.25232> PMID: 30746898  
40  
41 487 24. Kwantwi LB, Tunu BK, Boateng D, Quansah DY. Body Mass Index, Haemoglobin, and  
42  
43 488 Total Lymphocyte Count as a Surrogate for CD4 Count in Resource Limited Settings. *J*  
44  
45 489 *Biomarkers*. 2017; 2017: 7907352.  
46  
47 490 <https://www.ncbi.nlm.nih.gov/pmc/articles/PMC5412137/> PMID: 28484663  
48  
49 491 25. Akinola NO, Olasode O, Adediran IA, Onayemi O, Murainah A, Irinoye O, et al. The  
50  
51 492 search for a predictor of CD4 cell count continues: Total lymphocyte count is not a  
52  
53 493 substitute for CD4 cell count in the management of HIV-infected individuals in a  
54  
55 494 resource-limited setting. *Clinical Infectious Diseases*. 2004;39(4):579–81.  
56  
57 495 <https://doi.org/10.1086/422722> PMID: 15356826  
58  
59  
60

- 1  
2  
3 496 26. Koethe JR, Jenkins CA, Lau B, Shepherd BE, Wester W, Rebeiro PF, et al. Higher time-  
4 497 updated body mass index: association with improved CD4+ cell recovery on HIV  
5 498 treatment. *Journal of Acquired Immune Deficiency Syndromes*. 2016;73(2):197-204.  
6 499 <https://dx.doi.org/10.1097%2FQAI.0000000000001035> PMID: 27116044  
7  
8  
9  
10 500 27. Biadgilign S, Reda AA, Digaffe T. Predictors of mortality among HIV infected patients  
11 501 taking antiretroviral treatment in Ethiopia: a retrospective cohort study. *AIDS research*  
12 502 *and therapy*. 2012;9:15. <https://doi.org/10.1186/1742-6405-9-15> PMID: 22606951  
13  
14  
15  
16 503 28. Reda AA, Biadgilign S, Deribew A, Gebre B, Deribe K. Predictors of Change in CD4  
17 504 Lymphocyte Count and Weight among HIV Infected Patients on Anti-Retroviral  
18 505 Treatment in Ethiopia: A Retrospective Longitudinal Study. Ensoli B, editor. *PLoS One*.  
19 506 2013;8(4):e58595. <https://doi.org/10.1371/journal.pone.0058595> PMID: 23573191  
20  
21  
22  
23  
24 507 29. Naidoo K, Yende-Zuma N, Augustine S. A retrospective cohort study of body mass index  
25 508 and survival in HIV infected patients with and without TB co-infection. *Infectious*  
26 509 *Diseases of Poverty*. 2018;7:35. <https://doi.org/10.1186/s40249-018-0418-3> PMID:  
27 510 29690932  
28  
29  
30  
31 511 30. Griesel R, Kawuma AN, Wasmann R, Sokhela S, Akpomiemie G, Venter WF, et al.  
32 512 Concentration-response relationships of dolutegravir and efavirenz with weight change  
33 513 after starting antiretroviral therapy. *British Journal of Clinical Pharmacology*. 2022; 88(3):  
34 514 883- 893. <https://doi.org/10.1111/bcp.15177> PMID: 34954840  
35  
36  
37  
38  
39 515 31. Van der Sande MA, van der Loeff MF, Aveika AA, Sabally S, Togun T, Sarge-Njie R, et  
40 516 al. Body mass index at time of HIV diagnosis: a strong and independent predictor of  
41 517 survival. *Journal of Acquired Immune Deficiency Syndromes*. 2004;37(2):1288-94  
42 518 <https://doi.org/10.1097/01.qai.0000122708.59121.03> PMID: 15385737  
43  
44  
45  
46  
47 519 32. Grinspoon S, Mulligan K. Weight loss and wasting in patients infected with Human  
48 520 Immunodeficiency Virus. *Clinical Infectious Diseases*. 2003;36(Supplement\_2):S69-78.  
49 521 <https://doi.org/10.1086/367561> PMID: 12652374  
50  
51  
52  
53 522 33. Mwamburi DM, Wilson IB, Jacobson DL, Spiegelman D, Gorbach SL, Knox TA, et al.  
54 523 Understanding the role of HIV load in determining weight change in the era of highly

- 1  
2  
3 524 active antiretroviral therapy. *Clinical Infectious Diseases*. 2005;40(1):167-73.  
4  
5 525 <https://doi.org/10.1086/426591> PMID: 15614708  
6  
7 526 34. Fana GT, Ndhlovu CE. Renal dysfunction among anti-retroviral therapy naïve HIV  
8  
9 527 infected patients in Zimbabwe. *The Central African Journal of Medicine*. 2011;57(1-4):1-  
10  
11 528 5. <https://www.ajol.info/index.php/cajm/article/view/73724> PMID: 24968654  
12  
13 529 35. Gupta SK, Smurzynski M, Franceschini N, Bosch RJ, Szczech LA, Kalayjian RC. The  
14  
15 530 effects of HIV-1 viral suppression and non-viral factors on quantitative proteinuria in the  
16  
17 531 HAART era. *Antiviral Therapy*. 2009;14(4): 543–549. PMID: 19578239  
18  
19 532 36. Rednor SJ, Ross MJ. Molecular mechanisms of injury in HIV-associated nephropathy.  
20  
21 533 *Frontiers in Medicine*. 2018;5:177. <https://doi.org/10.3389/fmed.2018.00177> PMID:  
22  
23 534 29930940  
24  
25 535

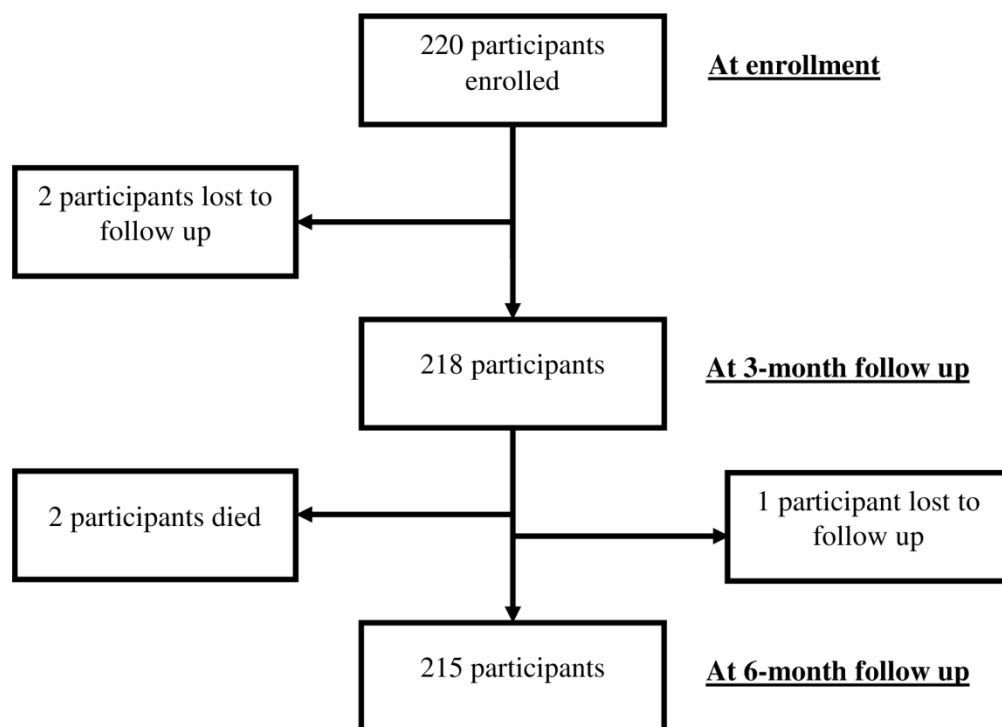

Figure 1. Consort diagram.

146x105mm (300 x 300 DPI)



1  
2  
3  
4  
5  
6  
7  
8  
9  
10  
11  
12  
13  
14  
15  
16  
17  
18  
19  
20  
21  
22  
23  
24  
25  
26  
27  
28  
29  
30  
31  
32  
33  
34  
35  
36  
37  
38  
39  
40  
41  
42  
43  
44  
45  
46  
47  
48  
49  
50  
51  
52  
53  
54  
55  
56  
57  
58  
59  
60

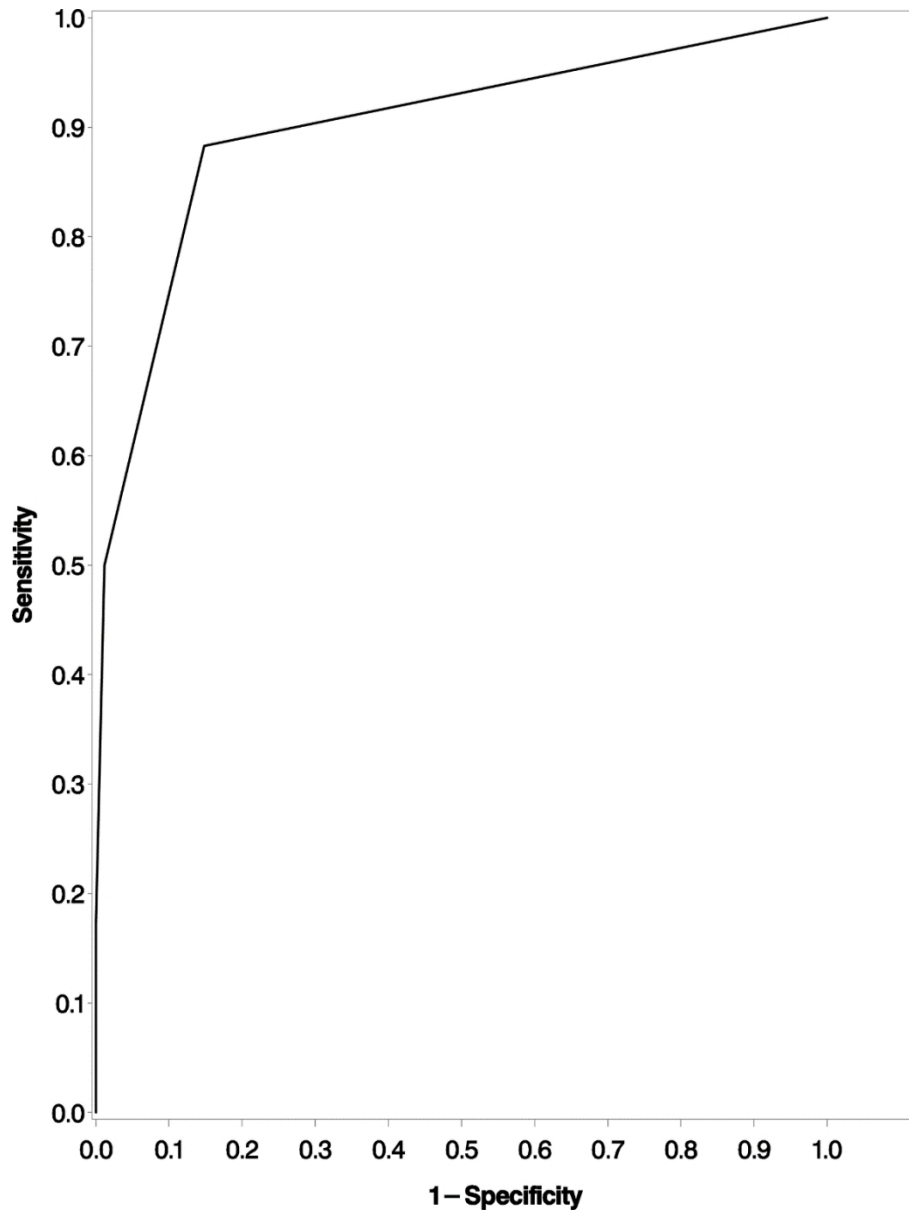

Figure 2. Receiver Operating Characteristic curve assessing a model using BMI decrease, proteinuria, and total lymphocyte counts to predict viral non-suppression among HIV-infected individuals initiated on ART in Dar es Salaam, Tanzania, 2019

137x181mm (220 x 220 DPI)

## Supplementary Figure 1. Scatter plots of BMI and CD4 counts

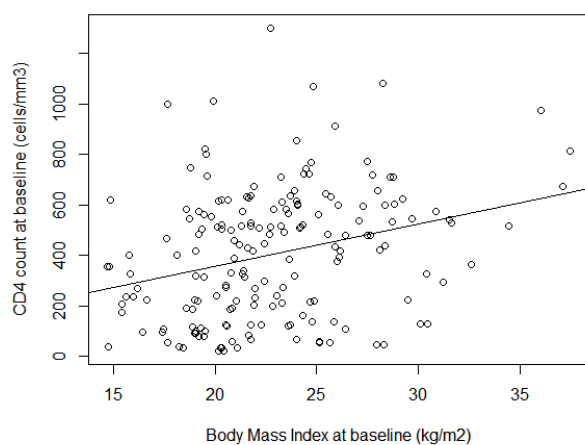

rho 0.287, p <0.0001

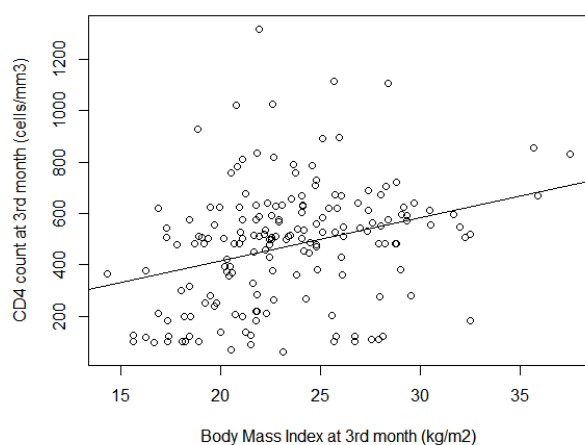

rho 0.305, p <0.0001

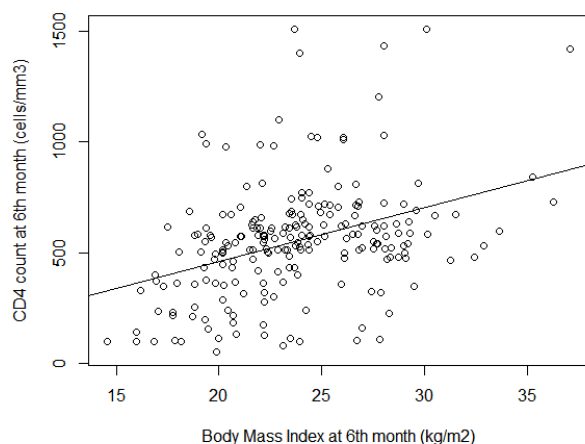

rho 0.373, p <0.0001

Supplementary Figure 2. Scatter plots of total lymphocyte count and CD4 count



rho 0.613, p <0.0001



rho 0.650, p <0.0001



rho 0.602, p <0.0001

Supplementary Figure 3. Scatter plots of urine protein and CD4 count



rho -0.364, p <0.0001



rho -0.334, p <0.0001



rho -0.372, p <0.0001

# Reporting checklist for cohort study.

Based on the STROBE cohort guidelines.

## Instructions to authors

Complete this checklist by entering the page numbers from your manuscript where readers will find each of the items listed below.

Your article may not currently address all the items on the checklist. Please modify your text to include the missing information. If you are certain that an item does not apply, please write "n/a" and provide a short explanation.

Upload your completed checklist as an extra file when you submit to a journal.

In your methods section, say that you used the STROBE cohort reporting guidelines, and cite them as:

von Elm E, Altman DG, Egger M, Pocock SJ, Gøtzsche PC, Vandenbroucke JP. The Strengthening the Reporting of Observational Studies in Epidemiology (STROBE) Statement: guidelines for reporting observational studies.

|                           |                     |                                                                                    | Page   |
|---------------------------|---------------------|------------------------------------------------------------------------------------|--------|
|                           |                     | Reporting Item                                                                     | Number |
| <b>Title and abstract</b> |                     |                                                                                    |        |
| Title                     | <a href="#">#1a</a> | Indicate the study's design with a commonly used term in the title or the abstract | 1      |
| Abstract                  | <a href="#">#1b</a> | Provide in the abstract an informative and balanced summary                        | 3      |

of what was done and what was found

## Introduction

Background / [#2](#) Explain the scientific background and rationale for the 6  
rationale investigation being reported

Objectives [#3](#) State specific objectives, including any prespecified 7  
hypotheses

## Methods

Study design [#4](#) Present key elements of study design early in the paper 8

Setting [#5](#) Describe the setting, locations, and relevant dates, including 8-10  
periods of recruitment, exposure, follow-up, and data collection

Eligibility criteria [#6a](#) Give the eligibility criteria, and the sources and methods of 8-10  
selection of participants. Describe methods of follow-up.

Eligibility criteria [#6b](#) For matched studies, give matching criteria and number of -  
exposed and unexposed

Variables [#7](#) Clearly define all outcomes, exposures, predictors, potential 9,10  
confounders, and effect modifiers. Give diagnostic criteria, if  
applicable

Data sources / [#8](#) For each variable of interest give sources of data and details of 8-10  
measurement methods of assessment (measurement). Describe  
comparability of assessment methods if there is more than one  
group. Give information separately for for exposed and  
unexposed groups if applicable.

|    |                |                      |                                                                   |            |
|----|----------------|----------------------|-------------------------------------------------------------------|------------|
| 1  | Bias           | <a href="#">#9</a>   | Describe any efforts to address potential sources of bias         |            |
| 2  |                |                      |                                                                   |            |
| 3  |                |                      |                                                                   |            |
| 4  | Study size     | <a href="#">#10</a>  | Explain how the study size was arrived at                         | 8          |
| 5  |                |                      |                                                                   |            |
| 6  |                |                      |                                                                   |            |
| 7  | Quantitative   | <a href="#">#11</a>  | Explain how quantitative variables were handled in the            | 9-11       |
| 8  | variables      |                      | analyses. If applicable, describe which groupings were chosen,    |            |
| 9  |                |                      | and why                                                           |            |
| 10 |                |                      |                                                                   |            |
| 11 |                |                      |                                                                   |            |
| 12 |                |                      |                                                                   |            |
| 13 |                |                      |                                                                   |            |
| 14 |                |                      |                                                                   |            |
| 15 | Statistical    | <a href="#">#12a</a> | Describe all statistical methods, including those used to control |            |
| 16 | methods        |                      | for confounding                                                   |            |
| 17 |                |                      |                                                                   |            |
| 18 |                |                      |                                                                   |            |
| 19 |                |                      |                                                                   |            |
| 20 | 10,11          |                      |                                                                   |            |
| 21 |                |                      |                                                                   |            |
| 22 |                |                      |                                                                   |            |
| 23 | Statistical    | <a href="#">#12b</a> | Describe any methods used to examine subgroups and                | 10, 11     |
| 24 | methods        |                      | interactions                                                      |            |
| 25 |                |                      |                                                                   |            |
| 26 |                |                      |                                                                   |            |
| 27 |                |                      |                                                                   |            |
| 28 |                |                      |                                                                   |            |
| 29 | Statistical    | <a href="#">#12c</a> | Explain how missing data were addressed                           | 12         |
| 30 | methods        |                      |                                                                   |            |
| 31 |                |                      |                                                                   |            |
| 32 |                |                      |                                                                   |            |
| 33 |                |                      |                                                                   |            |
| 34 | Statistical    | <a href="#">#12d</a> | If applicable, explain how loss to follow-up was addressed        | -          |
| 35 | methods        |                      |                                                                   |            |
| 36 |                |                      |                                                                   |            |
| 37 |                |                      |                                                                   |            |
| 38 |                |                      |                                                                   |            |
| 39 | Statistical    | <a href="#">#12e</a> | Describe any sensitivity analyses                                 |            |
| 40 | methods        |                      |                                                                   |            |
| 41 |                |                      |                                                                   |            |
| 42 |                |                      |                                                                   |            |
| 43 |                |                      |                                                                   |            |
| 44 |                |                      |                                                                   |            |
| 45 | 11             |                      |                                                                   |            |
| 46 |                |                      |                                                                   |            |
| 47 |                |                      |                                                                   |            |
| 48 | <b>Results</b> |                      |                                                                   |            |
| 49 |                |                      |                                                                   |            |
| 50 |                |                      |                                                                   |            |
| 51 | Participants   | <a href="#">#13a</a> | Report numbers of individuals at each stage of study—eg           | 12         |
| 52 |                |                      | numbers potentially eligible, examined for eligibility, confirmed | (figure 1) |
| 53 |                |                      | eligible, included in the study, completing follow-up, and        |            |
| 54 |                |                      | analysed. Give information separately for for exposed and         |            |
| 55 |                |                      |                                                                   |            |
| 56 |                |                      |                                                                   |            |
| 57 |                |                      |                                                                   |            |
| 58 |                |                      |                                                                   |            |
| 59 |                |                      |                                                                   |            |
| 60 |                |                      |                                                                   |            |

unexposed groups if applicable.

|    |                  |                      |                                                               |
|----|------------------|----------------------|---------------------------------------------------------------|
| 1  |                  |                      |                                                               |
| 2  |                  |                      |                                                               |
| 3  |                  |                      |                                                               |
| 4  | Participants     | <a href="#">#13b</a> | Give reasons for non-participation at each stage              |
| 5  |                  |                      |                                                               |
| 6  |                  |                      | 12                                                            |
| 7  |                  |                      | (figure 1)                                                    |
| 8  |                  |                      |                                                               |
| 9  | Participants     | <a href="#">#13c</a> | Consider use of a flow diagram                                |
| 10 |                  |                      |                                                               |
| 11 |                  |                      |                                                               |
| 12 | 12 (figure 1)    |                      |                                                               |
| 13 |                  |                      |                                                               |
| 14 |                  |                      |                                                               |
| 15 | Descriptive data | <a href="#">#14a</a> | Give characteristics of study participants (eg demographic,   |
| 16 |                  |                      | clinical, social) and information on exposures and potential  |
| 17 |                  |                      | confounders. Give information separately for exposed and      |
| 18 |                  |                      | unexposed groups if applicable.                               |
| 19 |                  |                      |                                                               |
| 20 |                  |                      |                                                               |
| 21 |                  |                      |                                                               |
| 22 |                  |                      |                                                               |
| 23 |                  |                      |                                                               |
| 24 |                  |                      |                                                               |
| 25 | Descriptive data | <a href="#">#14b</a> | Indicate number of participants with missing data for each    |
| 26 |                  |                      | variable of interest                                          |
| 27 |                  |                      |                                                               |
| 28 |                  |                      |                                                               |
| 29 |                  |                      |                                                               |
| 30 | See 12           |                      |                                                               |
| 31 |                  |                      |                                                               |
| 32 |                  |                      |                                                               |
| 33 | Descriptive data | <a href="#">#14c</a> | Summarise follow-up time (eg, average and total amount)       |
| 34 |                  |                      |                                                               |
| 35 |                  |                      |                                                               |
| 36 | 12               |                      |                                                               |
| 37 |                  |                      |                                                               |
| 38 |                  |                      |                                                               |
| 39 |                  |                      |                                                               |
| 40 | Outcome data     | <a href="#">#15</a>  | Report numbers of outcome events or summary measures          |
| 41 |                  |                      | over time. Give information separately for exposed and        |
| 42 |                  |                      | unexposed groups if applicable.                               |
| 43 |                  |                      |                                                               |
| 44 |                  |                      |                                                               |
| 45 |                  |                      |                                                               |
| 46 |                  |                      |                                                               |
| 47 | 14               |                      |                                                               |
| 48 |                  |                      |                                                               |
| 49 |                  |                      |                                                               |
| 50 | Main results     | <a href="#">#16a</a> | Give unadjusted estimates and, if applicable, confounder-     |
| 51 |                  |                      | adjusted estimates and their precision (eg, 95% confidence    |
| 52 |                  |                      | interval). Make clear which confounders were adjusted for and |
| 53 |                  |                      | why they were included                                        |
| 54 |                  |                      |                                                               |
| 55 |                  |                      |                                                               |
| 56 |                  |                      |                                                               |
| 57 |                  |                      |                                                               |
| 58 |                  |                      |                                                               |
| 59 |                  |                      |                                                               |
| 60 |                  |                      |                                                               |



|    |                          |                      |                                                                      |       |
|----|--------------------------|----------------------|----------------------------------------------------------------------|-------|
| 1  | Main results             | <a href="#">#16b</a> | Report category boundaries when continuous variables were            | 12-15 |
| 2  |                          |                      | categorized                                                          |       |
| 3  |                          |                      |                                                                      |       |
| 4  |                          |                      |                                                                      |       |
| 5  |                          |                      |                                                                      |       |
| 6  | Main results             | <a href="#">#16c</a> | If relevant, consider translating estimates of relative risk into    |       |
| 7  |                          |                      | absolute risk for a meaningful time period                           |       |
| 8  |                          |                      |                                                                      |       |
| 9  |                          |                      |                                                                      |       |
| 10 |                          |                      |                                                                      |       |
| 11 |                          |                      |                                                                      |       |
| 12 | -                        |                      |                                                                      |       |
| 13 |                          |                      |                                                                      |       |
| 14 |                          |                      |                                                                      |       |
| 15 | Other analyses           | <a href="#">#17</a>  | Report other analyses done—eg analyses of subgroups and              | 16    |
| 16 |                          |                      | interactions, and sensitivity analyses                               |       |
| 17 |                          |                      |                                                                      |       |
| 18 |                          |                      |                                                                      |       |
| 19 |                          |                      |                                                                      |       |
| 20 | <b>Discussion</b>        |                      |                                                                      |       |
| 21 |                          |                      |                                                                      |       |
| 22 |                          |                      |                                                                      |       |
| 23 | Key results              | <a href="#">#18</a>  | Summarise key results with reference to study objectives             | 20    |
| 24 |                          |                      |                                                                      |       |
| 25 |                          |                      |                                                                      |       |
| 26 | Limitations              | <a href="#">#19</a>  | Discuss limitations of the study, taking into account sources of     | 5     |
| 27 |                          |                      | potential bias or imprecision. Discuss both direction and            |       |
| 28 |                          |                      | magnitude of any potential bias.                                     |       |
| 29 |                          |                      |                                                                      |       |
| 30 |                          |                      |                                                                      |       |
| 31 |                          |                      |                                                                      |       |
| 32 |                          |                      |                                                                      |       |
| 33 |                          |                      |                                                                      |       |
| 34 | Interpretation           | <a href="#">#20</a>  | Give a cautious overall interpretation considering objectives,       | 18-20 |
| 35 |                          |                      | limitations, multiplicity of analyses, results from similar studies, |       |
| 36 |                          |                      | and other relevant evidence.                                         |       |
| 37 |                          |                      |                                                                      |       |
| 38 |                          |                      |                                                                      |       |
| 39 |                          |                      |                                                                      |       |
| 40 |                          |                      |                                                                      |       |
| 41 |                          |                      |                                                                      |       |
| 42 | Generalisability         | <a href="#">#21</a>  | Discuss the generalisability (external validity) of the study        | 20    |
| 43 |                          |                      | results                                                              |       |
| 44 |                          |                      |                                                                      |       |
| 45 |                          |                      |                                                                      |       |
| 46 |                          |                      |                                                                      |       |
| 47 | <b>Other Information</b> |                      |                                                                      |       |
| 48 |                          |                      |                                                                      |       |
| 49 |                          |                      |                                                                      |       |
| 50 | Funding                  | <a href="#">#22</a>  | Give the source of funding and the role of the funders for the       | 22    |
| 51 |                          |                      | present study and, if applicable, for the original study on which    |       |
| 52 |                          |                      | the present article is based                                         |       |
| 53 |                          |                      |                                                                      |       |
| 54 |                          |                      |                                                                      |       |
| 55 |                          |                      |                                                                      |       |
| 56 |                          |                      |                                                                      |       |
| 57 |                          |                      |                                                                      |       |
| 58 |                          |                      |                                                                      |       |
| 59 |                          |                      |                                                                      |       |
| 60 |                          |                      |                                                                      |       |

1 None The STROBE checklist is distributed under the terms of the Creative Commons Attribution  
2 License CC-BY. This checklist can be completed online using <https://www.goodreports.org/>, a tool  
3 made by the [EQUATOR Network](#) in collaboration with [Penelope.ai](#)  
4  
5  
6  
7  
8  
9  
10  
11  
12  
13  
14  
15  
16  
17  
18  
19  
20  
21  
22  
23  
24  
25  
26  
27  
28  
29  
30  
31  
32  
33  
34  
35  
36  
37  
38  
39  
40  
41  
42  
43  
44  
45  
46  
47  
48  
49  
50  
51  
52  
53  
54  
55  
56  
57  
58  
59  
60

For peer review only
