# Supplementary material for: Body mass index, proteinuria and total lymphocyte counts in predicting treatment responses among ART naïve individuals with HIV initiated on antiretroviral treatment in Dar es Salaam, Tanzania, 2019: a cohort study
Source: PubMed Central journal article supplement — BMJ Open. 2022 Jun 8;12(6):e059193. doi: 10.1136/bmjopen-2021-059193 (PMC9185589; doi:10.1136/bmjopen-2021-059193), 2022-06-08
Supplement: bmjopen-2021-059193supp001.pdf [file bmjopen-2021-059193supp001.pdf]

**Supplementary Figure 1. Scatter plots of BMI and CD4 counts**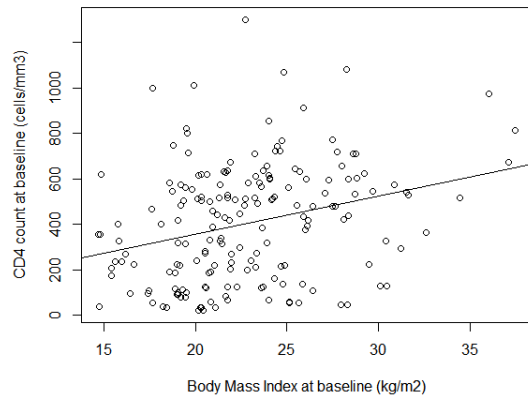

$\rho = 0.287, p < 0.0001$

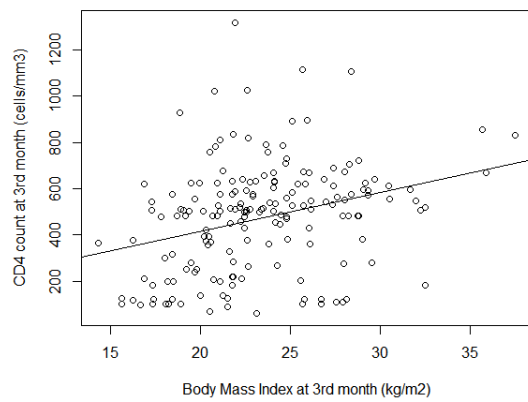

$\rho = 0.305, p < 0.0001$

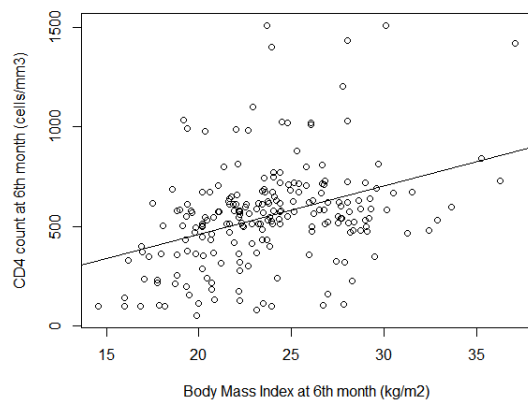

$\rho = 0.373, p < 0.0001$

**Supplementary Figure 2. Scatter plots of total lymphocyte count and CD4 count**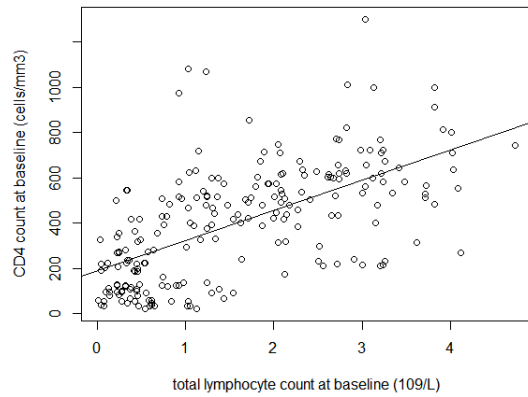

rho 0.613, p <0.0001

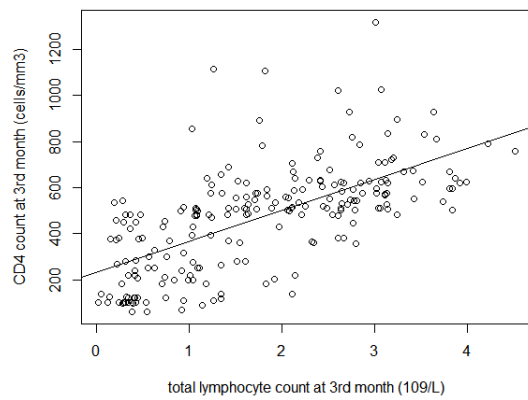

rho 0.650, p <0.0001

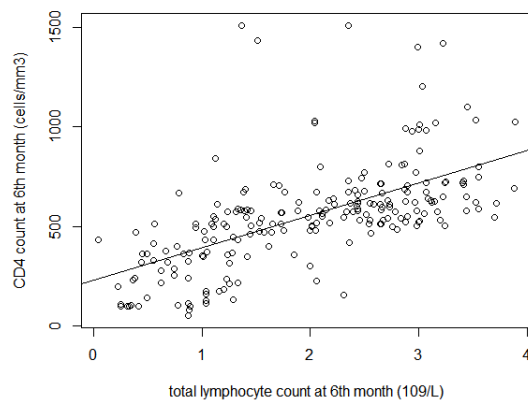

rho 0.602, p <0.0001

**Supplementary Figure 3. Scatter plots of urine protein and CD4 count**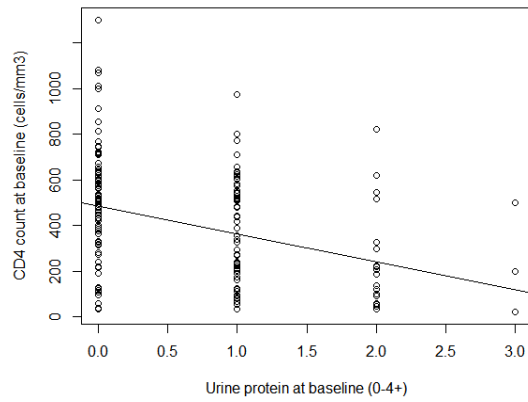

rho -0.364, p <0.0001

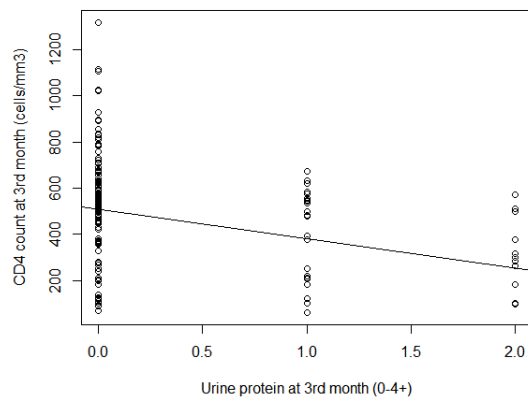

rho -0.334, p <0.0001

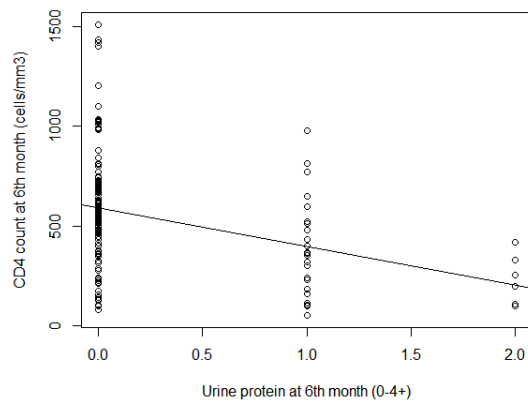

rho -0.372, p <0.0001
